1 **Lipid droplets regulate actin remodeling via prostaglandin signaling during *Drosophila***  
2 **oogenesis**

3

4 Michelle S. Giedt<sup>\*</sup> <sup>1</sup>, Jonathon M. Thomalla<sup>\*</sup> <sup>2</sup>, Matthew R. Johnson<sup>2</sup>, Zon Weng Lai<sup>3</sup>, Tina L.  
5 Tootle<sup>#</sup> <sup>1</sup>, and Michael A. Welte<sup>#</sup> <sup>2</sup>

6

7 <sup>\*</sup>equal contribution

8 <sup>#</sup>co-senior and co-corresponding authors, [tina-tootle@uiowa.edu](mailto:tina-tootle@uiowa.edu) and

9 [michael.welte@rochester.edu](mailto:michael.welte@rochester.edu)

10

11 <sup>1</sup> Anatomy and Cell Biology, University of Iowa Carver College of Medicine, Iowa City, IA

12 <sup>2</sup> Department of Biology, University of Rochester, Rochester, NY

13 <sup>3</sup> Harvard T.H. Chan Advanced Multi-omics Platform, Harvard T.H. Chan School of Public  
14 Health, Boston, MA

15

16

17

18 Short Title: Lipid droplets regulate actin remodeling via prostaglandin signaling

19

20 Key words: actin cytoskeleton, lipid droplets, prostaglandin signaling, *Drosophila*, oogenesis

21 **Abstract**

22

23 To ensure fertility, it is paramount to understand the factors controlling oocyte quality. One  
24 incompletely characterized factor contributing to oocyte quality is lipids. In somatic cells, a key  
25 regulator of lipid metabolism is lipid droplets (LDs), the sites of intracellular fat storage. Yet the  
26 role of LDs in fertility is poorly understood. Here we use *Drosophila* oogenesis as a model for  
27 uncovering if and how LDs promote egg development. LD accumulation in nurse cells coincides  
28 with dynamic actin remodeling necessary for late-stage follicle morphogenesis and fertility. Loss  
29 of major LD proteins, including PLIN2, Jabba, and ATGL, disrupts both actin bundle formation  
30 and cortical actin integrity; this unusual phenotype is also seen when Pxt, the enzyme  
31 responsible for prostaglandin (PG) synthesis, is missing. Further, both pharmacologic and  
32 genetic loss of PG synthesis or loss of PLIN2 or Jabba impairs intracellular LD dispersal. These  
33 similar phenotypes suggest that PGs and LD proteins act in the same pathway. Dominant  
34 genetic interaction studies indicate that there are three actin regulatory pathways: PLIN2  
35 regulates actin remodeling independent of PG signaling, whereas Jabba and ATGL act in two  
36 separate PG-dependent pathways to regulate actin remodeling. We find that neither Jabba nor  
37 ATGL modulate the levels of Pxt or its localization to the endoplasmic reticulum. As ATGL is a  
38 triglyceride lipase, we hypothesize that it may release arachidonic acid (AA), the substrate for  
39 PG production, from triglycerides stored in LDs. Indeed, lipidomic analysis reveals the presence  
40 of AA-containing triglycerides in ovaries. In addition, exogenous AA is toxic and reduction of  
41 ATGL ameliorates toxicity; these observations suggest that ATGL indeed generates free AA.  
42 Our studies provide the first evidence that LDs and their associated proteins regulate PG  
43 signaling to control actin remodeling. In particular, we propose that ATGL releases AA from LDs  
44 to drive PG synthesis necessary for follicle development. We speculate that the same pathways  
45 are conserved across organisms to regulate oocyte development and promote fertility.

## 46 **Introduction**

47 Rates of infertility have increased globally between 1990 and 2017 [1], and combatting this  
48 increase is considered a public health priority [2]. Fertility requires the production of high-quality  
49 oocytes. It is becoming increasingly clear that among the key factors ensuring oocyte quality are  
50 the amount and types of lipids present during oogenesis [3, 4]. In mammalian follicles, for  
51 example, fatty acids (FAs) likely contribute a critical source of energy since inhibitors of FA  
52 oxidation impair oocyte maturation [5, 6]. In addition, lipid signaling molecules – from steroid  
53 hormones to eicosanoids – control diverse aspects of oocyte development and fertility [7].  
54 Indeed, prostaglandins (PGs), a class of eicosanoids, regulate oocyte development, ovulation,  
55 fertilization, implantation, maintenance of pregnancy, and childbirth [8, 9]. Thus, control of lipid  
56 metabolism is likely central for oocyte development and fertility, yet only few of the underlying  
57 mechanisms have been elucidated.

58 Key regulatory steps in lipid metabolism are mediated by lipid droplets (LDs), the cellular  
59 organelles dedicated to the storage of neutral lipids [10]. For example, LDs store excess  
60 amounts of cholesterol and related sterols as sterol esters, and safely sequester toxic FAs in the  
61 form of triglycerides. Once such FAs are released by LD-bound lipases, they can then be  
62 shuttled to mitochondria for oxidative breakdown, used to generate various membrane  
63 precursors, or turned into signaling molecules [11]. Since both triglycerides and LDs are  
64 abundant in oocytes, LDs might perform similar regulatory roles during follicle development.  
65 Indeed, LD accumulation, composition, and localization are dynamic during oocyte maturation  
66 across organisms [3, 4, 12], and, in the context of obesity, oocytes display changes in LDs that  
67 are associated with infertility [13-15]. However, the functions of LDs in oogenesis remain largely  
68 undefined.

69 *Drosophila* oogenesis is a promising model for uncovering the roles of LDs in follicle  
70 development. Adult female flies have two ovaries, each comprised of ~15 ovarioles or chains of  
71 sequentially maturing follicles, also called egg chambers. Each follicle is made up of ~1000

72 epithelial cells termed follicle cells as well as 16 germline cells (15 nurse cells and one oocyte).  
73 Follicles develop over the course of ~10 days through 14 stages. Over just a few hours in mid-  
74 oogenesis, tens of thousands of LDs are newly formed and disperse throughout the nurse cells.  
75 Strikingly, failure to form LDs, due to loss of diacylglycerol O-acyl transferase 1 (DGAT1,  
76 *Drosophila* Midway), results in developmentally arrested follicles and an aberrant actin  
77 cytoskeleton [16]. These observations suggest that LDs may have a role in follicle development  
78 and directly or indirectly regulate actin.

79 Both LDs and the actin cytoskeleton undergo dramatic changes in mid-oogenesis (see  
80 Fig 1A-1I) [17]. Prior to Stage 8, only a few scattered LDs are found throughout the follicle, and  
81 the only obvious actin cytoskeletal structure in the nurse cells is F-actin (filamentous actin) at  
82 the cell cortex. In Stage 9, LD biogenesis is massively upregulated in the nurse cells, so that by  
83 Stage 10B, the nurse cell cytoplasm is full of uniformly sized LDs (~0.5  $\mu\text{m}$  in diameter) [16, 18].  
84 During Stage 10B, the actin cytoskeleton is also massively remodeled, parallel actin bundles  
85 extend from the plasma membrane to the nuclei to form a cage, and the cortical actin  
86 substantially thickens. Both of these actin structures are required during Stage 11 for the  
87 process of nurse cell dumping, during which the nurse cells squeeze their cytoplasmic contents  
88 into the oocyte via ring canals, intercellular bridges between the germline cells [19-21]; cortical  
89 actin provides the contractile force, and actin bundles prevent the nuclei from being pushed into  
90 and plugging the ring canals. Dumping also transfers the LDs from nurse cells to the oocyte.  
91 These LDs then provide the future embryo with stores of energy and specific proteins needed  
92 for embryo development; indeed, embryos with reduced numbers of LDs have reduced hatching  
93 probability [18, 22]. From Stage 12 onwards, oocyte LD content remains stable [23], and nurse  
94 cells undergo cell death [24].

95 The actin remodeling events during mid-oogenesis are regulated by lipid signaling via  
96 PGs. PGs are derived from arachidonic acid (AA) [8], a poly-unsaturated FA, which is converted  
97 first into  $\text{PGH}_2$  and then into several types of bioactive PGs. These enzymatic steps are

98 mediated by cyclooxygenase (COX) enzymes and specific PG synthases, respectively.  
99 *Drosophila* has a single COX-like enzyme called Pxt, and its absence during oogenesis results  
100 in severe disruption in actin bundle formation, breakdown of cortical actin, and failure of nurse  
101 cell contraction, ultimately leading to severe defects in follicle development and female sterility  
102 [25, 26]. How PG production is temporally and spatially regulated during *Drosophila* oogenesis  
103 is unknown, but in many cells the release of AA from cellular lipids is the rate limiting step [8,  
104 27]. Those precursor lipids are generally thought to be phospholipids in cellular membranes, but  
105 in mammalian immune cells neutral lipids are an essential source of AA for PG synthesis [28,  
106 29].

107         Given the significance of lipid signals in actin remodeling during *Drosophila* oogenesis  
108 and the central role of LDs in lipid metabolism in other cells, we sought to determine if LDs  
109 contribute to *Drosophila* follicle development. We find that loss of each of three lipid droplet  
110 proteins – LSD2/PLIN2 (subsequently referred to as PLIN2), Jabba, or ATGL (*Drosophila*  
111 Brummer) – results in *pxt*-like actin remodeling defects during Stage 10B. Conversely, loss of  
112 Pxt or pharmacological inhibition of PG synthesis results in aberrant LD clustering during Stage  
113 10B; LD clustering also occurs in *PLIN2* and *Jabba* mutants. The similar phenotypes led us to  
114 ask if LD proteins and Pxt function in the same pathway to regulate actin remodeling during  
115 *Drosophila* oogenesis. Dominant genetic interaction studies support that there are three actin  
116 regulatory pathways: PLIN2 regulates actin remodeling independent of PG signaling, whereas  
117 Jabba and ATGL act in two separate PG-dependent pathways. The connection between LD  
118 proteins and PG signaling is not due to Pxt localizing to LDs. Instead, our data support the  
119 model that ATGL is required to release AA to provide the substrate for PG production.  
120 Ultimately, these PGs control actin remodeling and thereby follicle development. Our studies  
121 thus have uncovered a role for LDs in regulating a critical developmental transition during  
122 oogenesis.

123

124 **Results**

125 *DGAT1 functions suggest a link between LDs and actin organization during oogenesis*

126 During *Drosophila* oogenesis, both actin and LDs undergo dramatic changes over the course of  
127 just a few hours (Fig. 1A-I). F-actin present at the cortex of the nurse cells throughout early  
128 stages (Fig. 1 F, G) is dramatically strengthened during Stage 10B (Fig 1H); in addition, actin  
129 bundles form that hold the nurse cell nuclei in place (Fig. 1H-1J). LDs start to accumulate in  
130 Stage 9, fill the nurse cells by Stage 10B, and are transferred to the oocyte by Stage 12 (Fig.  
131 1B-D).

**Fig 1. LD accumulation and actin cytoskeletal remodeling occur during mid-oogenesis. (A-D)** Single confocal slices of wild-type follicles of the indicated stages (E) stained for LDs (Nile red) in white and DNA (Hoechst) in cyan. **(E)** Schematic depicting the progression of LD accumulation and actin remodeling during oogenesis. **(F-I)** Single confocal slices of wild-type follicles of the indicated stages (E) stained for F-Actin (phalloidin) in white and DNA (Hoechst) in cyan. Note that all images and diagram in A-I are on top of a black box. **(J)** Single confocal slice of a Stage 10B nurse cell stained for F-Actin (phalloidin) in white and DNA (Hoechst) in cyan; actin bundles are indicated by the green arrowhead and cortical actin is indicated by the magenta arrowhead. Scale bars=50 $\mu$ m (A-I) or 10 $\mu$ m (J). **(K)** Thin layer chromatograph of whole-lipid extracts from late-stage follicles. **(L)** Quantitation of (K), in which the ratio of TAG to cholesterol intensity is plotted; error bars, SD. Few LDs are present in the nurse cells during early oogenesis, but begin to accumulate by Stage 9 (B). By Stage 10B, LDs are present in large numbers and evenly distributed throughout the nurse cell cytoplasm (C). The LDs are dumped into the oocyte during Stage 11 and are highly abundant in the ooplasm by Stage 12 (D). This temporal accumulation is also reflected by the increase in triglycerides and sterol esters (K, L), neutral lipids stored in LDs. Massive remodeling of the nurse cell actin cytoskeleton begins when LDs are highly abundant. During Stage 10B (H), cortical actin thickens (magenta arrowhead, J) and parallel actin bundles extend from the nurse cell membrane to the nucleus (green arrowhead, J). During Stage 11, the actin bundles hold the nurse cell nuclei in place while the cortical actin contracts, squeezing the nurse cell cytoplasm into the oocyte in a process termed nurse cell dumping. This process ultimately results in the nurse cells shrinking and the oocyte expanding (I). Cortical actin surrounds each nurse cell throughout oogenesis(F-I); during Stage 10B, actin bundles form (J) and support nurse cell dumping.

132

133 The main neutral lipids stored in LDs are triglycerides and/or sterol esters [10]. Using  
134 thin-layer chromatography on tissue extracts, we find that developing follicles accumulate both  
135 classes of neutral lipids, with a large predominance of triglycerides (Fig 1K-1L). The final step of  
136 triglyceride synthesis is mediated by DGATs, which catalyze the attachment of a third FA to

137 diacylglycerol. Like most animals, *Drosophila* encodes two such enzymes, DGAT1/Midway, and  
138 DGAT2 [30]. Genome-wide expression data indicate that DGAT1 predominates in most tissues,  
139 including in ovaries [31]. In *DGAT1* loss-of-function mutants, LDs fail to accumulate and follicles  
140 die by Stage 8/9 of oogenesis [16]. We confirmed that LDs in nurse cells and oocytes (though  
141 not follicle cells) are essentially abolished in follicles from *DGAT1* mutant animals and that  
142 mutant ovaries have massively reduced amounts of neutral lipids (Fig 2A-2D).

**Fig 2. DGAT1 is required for LD formation and actin cytoskeletal remodeling. (A-B)** Single confocal slices of Stage 9 follicles stained for LDs (Nile red) in white and DNA (Hoechst) in cyan. **(A)** WT, wild-type (Oregon R). **(B)** *DGAT1*<sup>-/-</sup> (*DGAT1*<sup>QX25</sup>/*DGAT1*<sup>RF48</sup>). **(C)** Thin layer chromatograph of whole-lipid extracts from whole ovary lysates of the indicated genotypes. **(D)** Graph of neutral lipid levels in the ovaries of the indicated genotypes normalized to cholesterol; TAG=triacylglycerol and SE=sterol esters. Error bars, SD. \*\**p*=0.0028, \**p*=0.0234, Sidák's multiple comparisons test. **(E-G)** Single confocal slices of *DGAT1*<sup>-/-</sup> follicles of the indicated stages stained for F-Actin (phalloidin) in white and DNA (Hoechst) in cyan. **(H-I)** Single confocal slices of germline RNAi knockdown of *DGAT1* (*mat-alpha4-Gal4-VP16>DGAT1* RNAi (TRiP.HMC06242)); same follicle, different focal plane, stained for F-Actin (H, phalloidin) or LDs (I, Nile red) in white and DNA (Hoechst) in cyan. Magenta arrowheads indicate cortical actin defects, and green arrowheads indicate actin bundle defects. Scale bars=50µm. Loss of DGAT1 results in decreased lipid accumulation in the ovaries (C-D) and a loss of LDs in nurse cells and oocyte (B compared to A). Loss of DGAT1 also results in defects within the actin cytoskeleton. In early and mid-oogenesis, cortical actin breaks down (magenta arrowheads) and actin bundles form prematurely (green arrowheads) (E-F). Ultimately, *DGAT1*<sup>-/-</sup> follicles die at mid-oogenesis (G). Germline RNAi knockdown of *DGAT1* exhibits both actin remodeling defects (H) and decreased LD accumulation (I).

143  
144 It had previously been reported that DGAT1 mutant follicles form premature actin  
145 bundles [16]. We also observe such bundles in the *DGAT1* mutant, e.g., in Stage 9 (Fig 2F,  
146 green arrowhead); in the wild type, they only appear by Stage 10B (Fig 1J). In addition, we also  
147 detect defects in cortical actin, such as absence from the nurse cell periphery or aggregates  
148 around ring canals between neighboring nuclei (Fig 2E-2F, magenta arrowhead). DGAT1 is  
149 expressed throughout the adult fly, particularly in the fat body, the fly's adipose tissue [31]. Yet  
150 knocking down DGAT1 expression specifically in the germline via RNAi was sufficient to  
151 severely restrict LD accumulation and result in abnormal bundle formation and fractured cortical

152 actin (Fig 2H-2I). These tissue-autonomous actin defects suggest that DGAT1 and  
153 consequently LDs in nurse cells are linked to actin remodeling.

154 Because lack of DGAT1 results in follicle death, it is conceivable that the actin defects  
155 are a secondary consequence of the dramatic breakdown of cellular structures. This possibility  
156 seems unlikely since germline specific knockdown of DGAT1 allowed follicles to progress  
157 further, yet still resulted in fewer LDs and in actin defects (Fig 2H-2I). Nevertheless, to  
158 circumvent this problem, we next sought to disrupt specific LD functions without preventing LD  
159 accumulation or causing follicle death.

160

#### 161 Major lipid droplet proteins are required for actin remodeling in nurse cells

162 In early *Drosophila* embryos, the two most abundant LD-specific proteins are PLIN2 and Jabba  
163 [32, 33]. PLIN2 is one of the two members of the perilipin family of LD proteins in flies and  
164 regulates lipid metabolism by protecting LDs from the lipolytic machinery [34-36]. Jabba anchors  
165 proteins from other cellular compartments to LDs [33, 37] and has been proposed to contribute  
166 to lipid metabolism during oogenesis [38].

167 Similar to germline knockdown of DGAT1 (Fig 3B), females lacking either Jabba or  
168 PLIN2 display two types of actin defects during oogenesis (Fig 3C-3D compared to 3A). First,  
169 actin bundles are aberrant. Specifically, some nurse cell membranes lack bundles, and the  
170 bundles that form are not uniformly distributed, shorter, and/or fail to project toward the nurse  
171 cell nuclei (Fig 3C-3D, green arrowheads). Second, cortical actin is broken down, leading to the  
172 appearance of multinucleate nurse cells (Fig 3C-3D, magenta arrowheads). Since in these  
173 mutants LDs are abundant [18, 33] (see also Fig 4) and because the frequency of dying follicles  
174 is similar to wild type (data not shown), we conclude that disruption of LD function indeed affects  
175 actin remodeling.



**Fig 3. LD proteins regulate actin bundling and cortical actin integrity in Stage 10B follicles.** (A-F) Maximum projections of three confocal slices of S10B follicles stained for F-Actin (phalloidin) in white, and DNA (DAPI) in cyan. Arrowheads indicate examples of defective actin bundling (green) and disrupted cortical actin (magenta). Images were brightened by 30% to increase clarity. Black boxes were placed behind channel labels to improve visualization. Scale bars=50 $\mu$ m. (A) WT, *wild-type* (*yw*). (B) *DGAT1* RNAi (*osk3-GAL4>TRiP.HMC06242/+*). (C) *Jabba*<sup>-/-</sup> (*Jabba<sup>z101</sup>/Jabba<sup>z101</sup>*). (D) *PLIN2*<sup>-/-</sup> (*Lsd-2<sup>KG00149</sup>/Lsd-2<sup>KG00149</sup>*). (E) *ATGL*<sup>-/-</sup> (*bmm<sup>1</sup>/bmm<sup>1</sup>*). (F) *pxt*<sup>-/-</sup> (*pxt<sup>f01000</sup>/pxt<sup>f01000</sup>*). In wild-type late Stage 10B follicles, actin bundles extend from the nurse cell periphery to the nucleus, and the cortical actin is thickened relative to earlier stages (A). Actin bundles fail to form or form improperly, and cortical actin is disrupted upon RNAi knockdown of *DGAT1* (B), or loss of *Jabba* (C), *PLIN2* (D), or *ATGL* (E). These phenotypes resemble loss of the COX-like enzyme *Pxt* (F).

176

177 Most actin regulators impact either actin bundle formation or cortical actin, but not both  
178 [17, 21]. However, the same combination of phenotypes is observed when PG signaling is lost:  
179 lack of the COX-like enzyme *Pxt* causes delayed bundle development, collapsed, stunted or  
180 absent actin bundles, and cortical actin breakdown with a failure of nurse cell contraction (Fig  
181 3F compared to 3A) [25, 26]. In most cases of actin bundling defects, nurse cell nuclei are  
182 pushed into the ring canals when the cortical actin contracts. However, this does not occur in  
183 *Pxt* [26, 39], *Jabba*, or *PLIN2* mutants (data not shown), suggesting that cortical actin  
184 contraction is also disrupted, presumably as result of the simultaneous breakdown of cortical  
185 actin. The fact that loss of all three proteins results in this unusual combination of phenotypes  
186 suggests a functional relationship between PGs and LD proteins in actin remodeling.

187

### 188 Both LD proteins and PG signaling control the intracellular distribution of LDs

189 The similarities between lack of PG signaling and lack of LD proteins extends to phenotypes  
190 beyond F-actin: *Jabba*, *PLIN2*, and *pxt* mutants all display altered spatial distribution of LDs. In  
191 wild-type Stage 10B follicles, LDs are dispersed throughout the entire nurse cell cytoplasm, with  
192 only minor variations in LD density (Fig 4A-4A'). In contrast, in all three mutants, some regions  
193 of the cytoplasm are depleted of LDs, while others have dense LD accumulation/clustering (Fig

194 4B-4D'). Clustering varies somewhat across the same follicle and between follicles. But when  
195 Stage 10B follicles were scored as having either normal, mild, or severe LD clustering (see  
196 Material and Methods for details), half or more of all follicles exhibited severe clustering in all  
197 three mutants (Fig 4F).

**Fig 4. PG signaling and LD proteins promote LD dispersal. (A-E')** Single confocal slices of follicles of Stage 10B follicles stained for LDs (Nile red) in white and DNA (Hoechst) in cyan; A'-E' are zoomed in images of A-E. A black box was added under the channel labels in A' to aid in visualization. **(A)** WT, wild-type (Oregon R). **(B)** *pxt*<sup>-/-</sup> (*pxt*<sup>f01000</sup>/*pxt*<sup>f01000</sup>). **(C)** *Jabba*<sup>-/-</sup> (*Jabba*<sup>DL</sup>/*Jabba*<sup>DL</sup>). **(D)** *PLIN2*<sup>-/-</sup> (*LSD-2*<sup>KG</sup>/*LSD-2*<sup>KG</sup>). **(E)** *ATGL*<sup>-/-</sup> (*bmm*<sup>1</sup>/*bmm*<sup>1</sup>). **(F)** Quantification of LD clustering in Stage 10B follicles for the indicated genotypes. Follicles were classified as normal or as exhibiting moderate or severe clustering, and the percentage of each class was calculated. **(G)** Quantification of actin cytoskeletal and LD clustering defects in control versus 3mM aspirin-treated Stage 10B follicles. Dots represent the average of separate experiments; control n=49 and aspirin n=63. Error bars, SD. \*\*\**p*=0.0001, \*\*\*\*=*p*<0.0001, Sidák's multiple comparisons test. **(H-I')** Single confocal slices of Stage 10B follicles treated with vehicle (control, EtOH or DMSO) or 3mM aspirin for 1 hour, and then stained for F-Actin (H, I, phalloidin) or LDs (H', I', Nile red) in white; H'' and I'' are zoomed in images of H' and (I'). Note that images in panels H-H' are on black box, and a black box was added under the I'' label to aid in visualization. Scale bars=50µm (A-E, H-H', I-I') or 10µm (A'-E', H'', I''). Loss of Pxt or two LD proteins (Jabba and PLIN2) result in similar LD clustering/reorganization phenotypes. Similarly, treatment of Stage 10B follicles with 3mM aspirin, a COX inhibitor, for 1 hour results in both LD clustering (H'-H'' compared to I'-I'', and G) and actin cytoskeletal defects (H compared to I, and G).

198

199 To test whether clustering is caused by defective PG signaling within the follicle or some  
200 as-yet uncharacterized function of Pxt, we pharmacologically inhibited Pxt to abolish PG  
201 production [26]. Wild-type Stage 10B follicles were incubated *in vitro* for 1-1.5 hours in medium  
202 containing either the solvent control or 3mM aspirin, an inhibitor of COX enzymes. Follicles were  
203 then stained for both LDs and F-actin. Under control conditions, follicles maintain uniform LD  
204 distribution and intact actin bundles and cortical actin, very similar to follicles without any  
205 treatment (Fig 4G-4H''). In the aspirin treated samples, the actin cytoskeleton is disrupted, as  
206 expected from previous studies (Fig 4G-4I) [26]. This treatment causes LD clustering (Fig 4G,  
207 4I'-4I''). Such a rapid response supports the idea that PG signaling within the follicle not only  
208 promotes actin remodeling but also maintains LD dispersal. Together, our observations indicate

209 that LDs and PG signaling may reciprocally influence each other. As the molecular mechanisms  
210 underlying LD dispersal are not well understood, we focus the rest of the study on the actin  
211 remodeling effects.

212

213 *Pxt functions in a linear pathway with Jabba, but not with PLIN2, to regulate actin remodeling*

214 The similar actin phenotypes in *pxt*, *PLIN2*, and *Jabba* mutants suggest these proteins act in the  
215 same pathway to regulate actin remodeling. To test this hypothesis, we used a dominant  
216 genetic interaction assay to assess actin remodeling defects. As the severity of actin disruption  
217 can exhibit considerable variability within a given genotype, we developed a method to quantify  
218 both actin bundle and cortical actin defects from confocal stacks of phalloidin-stained Stage 10B  
219 follicles. Specifically, the degree of penetrance of actin bundle and cortical actin defects are  
220 scored separately and summed to give an Actin Defect Index (ADI) that is used to classify each  
221 follicle into three categories of defects: normal, mild, or severe (see the Material and Methods  
222 and S1 Fig for details).

**S1 Fig. Examples and criteria used for scoring actin remodeling phenotypes.**

Maximum projection of three confocal slices of representative Stage 10B follicles stained for F-Actin (phalloidin) in white, and DNA (DAPI) in cyan, and written definitions of the indicated actin bundle and cortical actin phenotypes. Actin bundle and cortical actin phenotypes were independently binned into four categories: Normal, Mild Defects, Moderate Defects, or Severe Defects. Images were brightened by 30% to increase clarity. Green arrowheads indicate examples of actin bundle defects, and magenta arrowheads indicate examples of cortical actin breakdown. Scale bar=50 $\mu$ m.

223

224 We expect heterozygosity for mutations in *pxt*, *PLIN2*, or *Jabba* alone to have little to no  
225 effect on actin dynamics. If either *PLIN2* and *Pxt* or *Jabba* and *Pxt* function in the same  
226 pathway, then double heterozygotes for *PLIN2* and *pxt* or *Jabba* and *pxt* will exhibit severe actin  
227 defects. Conversely, if they function in separate pathways, then actin defects in the double  
228 heterozygotes will remain low or be additive of what is observed in the single heterozygotes.

229 As expected, there are few actin defects in single heterozygotes of PLIN2 (63% normal)  
230 and *pxt* (80% normal) (Fig 5A-5B, 5G). Co-reduction of both PLIN2 and Pxt (*PLIN2*+/+;*pxt*+/+)  
231 does not significantly increase the frequency of actin defects (Fig 5C, 5G; 60% normal). This  
232 failure to exhibit a genetic interaction is not likely due to insufficient protein reduction as PLIN2  
233 heterozygotes show a 40% reduction in PLIN2 protein level (S2 Fig), but instead suggests that  
234 Pxt and PLIN2 regulate actin remodeling via separate pathways.

**Fig 5. PLIN2 acts independently of Pxt, while Jabba acts in a linear pathway with Pxt to regulate actin remodeling.** (A-F) Maximum projections of three confocal slices of S10B follicles stained for F-Actin (phalloidin) in white, and DNA (DAPI) in cyan. Arrowheads indicate examples of defective actin bundling (green) and disrupted cortical actin (magenta). Images were brightened by 30% to increase clarity. Scale bars=50 $\mu$ m. (A) *PLIN2*+/+ (*Lsd-2*<sup>KG00149</sup>/+). (B) *pxt*+/+ (*pxt*<sup>f01000</sup>/+). (C) *PLIN2*+/+; *pxt*+/+ (*Lsd-2*<sup>KG00149</sup>/+;; *pxt*<sup>f01000</sup>/+). (D) *Jabba*+/+ (*Jabba*<sup>z101</sup>/+). (E) *Jabba*+/+; *pxt*+/+ (*Jabba*<sup>z101</sup>/+; *pxt*<sup>f01000</sup>/+). (F) *PLIN2*+/+; *Jabba*+/+ (*Lsd-2*<sup>KG00149</sup>/+; *Jabba*<sup>z101</sup>/+). (G-I) Graphs of quantification of actin phenotypes. Data were from the following genotypes: *pxt*+/+ = *pxt*<sup>f01000</sup>/+ and *pxt*<sup>EY03052</sup>/+; *Jabba*+/+ = *Jabba*<sup>z101</sup>/+ and *Jabba*<sup>DL</sup>/+; *Jabba*+/+; *pxt*+/+ = *Jabba*<sup>z101</sup>/+; *pxt*<sup>f01000</sup>/+, *Jabba*<sup>z101</sup>/+; *pxt*<sup>EY03052</sup>/+, *Jabba*<sup>DL</sup>/+; *pxt*<sup>f01000</sup>/+, and *Jabba*<sup>DL</sup>/+; *pxt*<sup>EY03052</sup>/+; *PLIN2*+/+; *pxt*+/+ = *Lsd-2*<sup>KG00149</sup>/+;; *pxt*<sup>f01000</sup>/+ and *Lsd-2*<sup>KG00149</sup>/+;; *pxt*<sup>EY03052</sup>/+; and *PLIN2*+/+; *Jabba*+/+ = *Lsd-2*<sup>KG00149</sup>/+; *Jabba*<sup>z101</sup>/+. Actin defects were quantified by scoring the penetrance of actin bundle and cortical actin defects. Scores were summed and the total binned into one of three categories: normal, mildly defective, and severely defective. For a detailed description of the quantification see the Materials and Methods and Supplemental Figure 1. \*\*\*\**p*<0.0001, Pearson's chi-squared test. Error bars, SD. Both actin bundles and cortical actin are largely normal in *PLIN2*+/+ (A, G, I), *PLIN2*+/+; *pxt*+/+ (C, G), or *PLIN2*+/+; *Jabba*+/+ (F, I) Stage 10B follicles. In contrast, in *Jabba*+/+; *pxt*+/+ follicles (E), actin bundles are absent, sparse, and stunted and there are instances of cortical actin breakdown. The double heterozygotes thus exhibit significantly more mild and severe actin defects than either *pxt*+/+ (B, H) or *Jabba*+/+ (D, H) follicles (H).

**S2 Fig. *PLIN2*+/+ heterozygotes have reduced PLIN2 protein.** (A) Immunoblot comparing PLIN2 protein levels in wild type (WT, Oregon R), *PLIN2*+/+ (*Lsd-2*<sup>KG00149</sup>/+), and *PLIN2*-/- (*Lsd-2*<sup>KG00149</sup>/*Lsd-2*<sup>KG00149</sup>) Stage 10B follicles. (B) Quantification of (A), in which PLIN2 band intensity was normalized to the nonspecific bands (asterisk). *p*<0.0001, unpaired t-test, two-tailed. PLIN2 protein levels are reduced by approximately half in *PLIN2*+/+ Stage 10B follicles.

235

236 We next examined the relationship between Jabba and Pxt. Like before, the single  
237 heterozygotes have only minor actin defects, with the vast majority of all follicles exhibiting  
238 normal actin remodeling (Fig 5B, 5D, 5H). In contrast, only 11% of follicles from double

239 heterozygotes (*Jabba*<sup>+/+</sup>; *pxt*<sup>+/+</sup>) were normal, and the frequency of the severe class increased  
240 almost tenfold (Fig 5E, 5H). This synergistic increase in actin defects suggests Pxt and Jabba  
241 act in the same pathway to regulate actin remodeling.

242 For the relationship between Jabba and PLIN2, we considered two scenarios. In the first,  
243 Jabba acts in two pathways, one with PLIN2 and one with Pxt, to regulate actin remodeling. In  
244 the second, PLIN2 regulates actin remodeling independently of both Pxt and Jabba. The actin  
245 phenotypes of *PLIN2*<sup>+/+</sup>; *Jabba*<sup>+/+</sup> double heterozygotes are mild, with the frequency of each  
246 category similar to those seen in the single heterozygotes (Fig 5F, 5I). We conclude that actin  
247 remodeling is regulated by two separate pathways involving LD proteins, with Jabba and Pxt  
248 acting in the same pathway (see Fig 10).

249

#### 250 *Pxt is not enriched on LDs*

251 The observed genetic interaction between Jabba and Pxt could be explained if the two proteins  
252 directly or indirectly regulate each other's expression. However, Western analysis on extracts  
253 from Stage 10B follicles revealed that Jabba protein levels in wild-type and *pxt* mutant follicles  
254 were indistinguishable, as were Pxt levels in wild-type and *Jabba* mutant follicles (S3A-S3D  
255 Fig). Thus, we find no evidence that Jabba and Pxt interact by regulating each other's  
256 expression. We also find no effect of PLIN2 on the levels of Jabba and Pxt, and vice versa  
257 (S3A, S3E-S3F Fig).

#### **S3 Fig. Pxt and LD proteins do not affect each other's expression. (A, C, E)**

Immunoblots for Pxt and alpha-Tubulin (A), Jabba (C), and PLIN2 (E) of the indicated genotypes: WT, wild-type (Oregon R), *Jabba*<sup>-/-</sup> (*Jabba*<sup>z101</sup>/*Jabba*<sup>z101</sup>), *PLIN2*<sup>-/-</sup> (*Lsd-2*<sup>KG00149</sup>/*Lsd-2*<sup>KG00149</sup>), *ATGL*<sup>-/-</sup> (*bmm*<sup>1</sup>/*bmm*<sup>1</sup>) and *pxt*<sup>-/-</sup> (*pxt*<sup>f01000</sup>/*pxt*<sup>f01000</sup>). Asterisk indicates non-specific band in C and E. (B, D, F) Quantification of A, C, and E, respectively, in which band intensity was normalized as indicated. ns=p>0.05, unpaired t-test, two-tailed. Loss of Jabba, PLIN2, or ATGL have no effect on Pxt levels (A-B), and loss of Pxt has no effect on Jabba (C-D) or PLIN2 (E-F) levels.

258

259 Jabba and Pxt might also regulate each other's activity by being physically present in the  
260 same cellular compartment. Jabba localizes to LDs in embryos [33] and in nurse cells [23], and  
261 in other systems, components of the PG synthesis machinery are sometimes enriched on LDs  
262 [40]. Using immunostaining, LD purification, and *in vivo* centrifugation, we assessed Pxt's  
263 relationship to LDs in wild-type nurse cells. All three methods show that Pxt is not enriched on  
264 LDs. By immunostaining, Pxt localizes to the Golgi compartments prior to Stage 9 and to the  
265 Endoplasmic reticulum (ER) by Stage 10B, but not obviously to LDs (Fig 6A-6C"). We also  
266 prepared an LD enriched biochemical fraction from ovary lysates, as previously described for  
267 embryos [33], and analyzed it by Western blotting for Pxt, PLIN2 (as a marker for LDs), and  
268 Calnexin (as marker for the ER). Pxt behaves like an ER protein, not like an LD protein (Fig 6D-  
269 6E). Finally, we separated LDs from other cellular components by *in vivo* centrifugation: when  
270 living *Drosophila* follicles are centrifuged, their contents separate by density within each nurse  
271 cell/oocyte, with LDs accumulating on the side that faced up [32, 33]. Staining of fixed  
272 centrifuged follicles reveals no enrichment of Pxt (magenta) in the LD layer (green, marked by  
273 yellow arrowhead) (Fig 6F). We conclude that the majority of Pxt is not present on LDs.

**Fig 6. Pxt is not enriched on LDs. (A-C")** Single confocal slices of nurse cells of the indicated stages, stained for Pxt (A-C), organelle marker (A'-C'), and DNA (D"-G", Hoechst). Merged image (A""-C""): Pxt, magenta; organelle marker, green; and DNA, cyan. Organelle marker: LDs (A', A""; Nile red); Golgi-eYFP (B', B""); and ER-eYFP (C', C""). Scale bars=10µm. **(D)** Western blots of purified LDs and a dilution series of ovary lysate (OL) for Calnexin (magenta) and Pxt (green) in the top half of the blot and α-Tubulin (magenta) and PLIN2 (green) in the bottom half of the blot; dashed line indicates where the membrane was cut. **(E)** Quantification the abundance of proteins in the LD fraction relative to undiluted ovary lysate (OL). The ratio of signal for the LD and OL lane in Western blots like in (F) were computed for the indicated proteins and normalized to the average value for PLIN2. Error bars, SD. \*\* $p < 0.0028$ , Tukey's multiple comparisons test. **(F-F")** Single confocal slices of centrifuged wild-type Stage 10B follicle stained for Pxt (F), LDs (F', Nile red), and DNA (F", Hoechst). Merged image (A""-C""): Pxt, magenta; LDs, green; and DNA, cyan. Scale bars=50µm. Pxt does not colocalize with LDs (A-A""), is not enriched on purified LDs (D-E), and does not co-accumulate with LDs in centrifuged follicles (F-F"). Instead, Pxt localizes to the Golgi during Stage 8 (B-B") and the ER during Stage 10B (C-C").

274

275           Alternatively, Pxt and Jabba might genetically interact because they influence each  
276 other's localization. We find that this is not the case, as in Stage 10B follicles, Pxt still robustly  
277 colocalizes with the ER in *Jabba* mutants (S4B-S4B''' compared to S4A-S4A''' Fig), and Jabba  
278 still localizes to LDs in *pxt* mutants (S4F-S4F''' compared to S4E-S4E'''). There are some  
279 changes in the overall spatial distribution of LDs and ER in these mutants: LDs are clustered in  
280 *pxt* mutant (consistent with Fig 4B-4B') and, in *Jabba* mutants, the ER has a more diffuse  
281 appearance and is excluded from areas occupied by LD clusters (S4B-S4B''' compared to S4A-  
282 S4A''' Fig). However, in either mutant condition, Jabba and Pxt remain enriched on LDs and ER,  
283 respectively, as in the wild type. Similarly, loss of PLIN2 has no effect on Pxt localization (S4C-  
284 S4C''' Fig).

**S4 Fig. LD proteins do not affect Pxt's localization to the ER. (A-D''''')** Single confocal slices of Stage 10B nurse cells, stained for Pxt (A-D), Calnexin (A'-D', ER marker), and DNA (A''-D'', Hoechst). Merged image (A''', A''''-D''', D'''''): Pxt, magenta; Calnexin (ER marker), green; and DNA (Hoechst), cyan. **(E-F''''')** Single confocal slices of Stage 10B nurse cells, stained for Jabba (E-F), LDs (E'-F', Nile red) and DNA (E''-F'', Hoechst). Merged image (E''', E''''', F''', F'''''): Jabba, magenta; LDs (Nile red), green; and DNA (Hoechst), cyan. Genotypes: WT, wild-type (Oregon R); *Jabba* *-/-* (*Jabba*<sup>z101</sup>/*Jabba*<sup>z101</sup>); *PLIN2* *-/-* (*LSD-2*<sup>KG00149</sup>/*LSD-2*<sup>KG00149</sup>); *ATGL* *-/-* (*bmm*<sup>1</sup>/*bmm*<sup>1</sup>), and *pxt* *-/-* (*pxt*<sup>f01000</sup>/*pxt*<sup>f01000</sup>). Scale bars=10µm. Note that black boxes were added under some panel and/or channel labels to aid in visualization (A, A', A''', D, E, F' and F'''). In Stage 10B follicles, Pxt's localization to the ER is similar to wild-type in *Jabba* (B-B'''), *PLIN2* (C-C'''), and *ATGL* mutants (D-D'''). As in the wild type (E-E'''), Jabba localizes to LDs in *pxt* mutants (F-F'''), even though the spatial distribution of LDs is altered.

285  
286 *The triglyceride lipase ATGL/Brummer and Pxt act in the same pathway to regulate actin*  
287 If there is no clear physical relationship between LDs and Pxt, how else might LDs modulate PG  
288 production? In some mammalian cells, the substrate for COX enzymes, arachidonic acid (AA),  
289 can be released from triglycerides stored in LDs by the triglyceride lipase ATGL [28]. These FAs  
290 can either be directly used as COX substrate or be first incorporated into membrane  
291 phospholipids and subsequently released by phospholipases [41]. In the latter case, diffusing  
292 phospholipids may deliver AA to ER regions spatially distant from LDs. Thus, AA availability for  
293 PG production may ultimately depend on the breakdown of LD triglycerides.

294 The *Drosophila* homolog of ATGL is called Brummer (Bmm; referred thereafter as ATGL  
295 for clarity); it catalyzes the conversion of triacylglycerol to diacylglycerol and free FA [42]. Based  
296 on RNA-seq analyses, ATGL is highly expressed in ovaries [43], and in-situ analysis reveals  
297 that ATGL mRNA is expressed in the nurse cells and oocytes in early and mid-oogenesis [44].  
298 Intriguingly, we find that loss of ATGL causes actin remodeling defects in Stage 10B follicles  
299 that resemble those seen in *pxt* and *Jabba* mutants, *i.e.*, defects in both cortical actin and actin  
300 bundles (Fig 3C, 3E, 3F compared to 3A); conversely, loss of ATGL does not alter LD dispersal  
301 (Fig. 4E-4F). Additionally, ATGL does not regulate the level or localization of Pxt (S3A and S4D-  
302 S4D''' Fig), similar to our findings related to *Jabba* and *PLIN2*.

303 To test if ATGL acts in the same pathway as Pxt to regulate actin remodeling, we used  
304 our quantitative dominant genetic interaction assay to assess actin remodeling during Stage  
305 10B. As expected, actin remodeling is largely normal in single heterozygotes of *pxt* (87%) and  
306 *ATGL* (84%) (Fig 7A, 7D). In contrast, only 46% of the double heterozygotes of *pxt* and *ATGL*  
307 (*pxt/ATGL*) exhibit normal actin remodeling, and the frequency of severe cases is increased  
308 almost tenfold (Fig 7B, 7D). This synergistic increase in actin defects indicates that ATGL and  
309 Pxt regulate actin remodeling via a shared pathway.

**Fig 7. ATGL acts in a linear pathway with Pxt but not with Jabba to regulate actin remodeling.** (A-C) Maximum projections of three confocal slices of Stage 10B follicles stained for F-Actin (phalloidin) in white, and DNA (DAPI) in cyan. Arrowheads indicate examples of defective actin bundling (green) and disrupted cortical actin (magenta). Images were brightened by 30% to increase clarity. Scale bars=50 $\mu$ m. (A) *ATGL*<sup>-/+</sup> (*bmm*<sup>1/+</sup>). (B) *ATGL/pxt* (*bmm*<sup>1/pxt</sup><sup>f01000</sup>). (C) *Jabba*<sup>-/+</sup>; *ATGL*<sup>-/+</sup> (*Jabba*<sup>z101/+</sup>; *bmm*<sup>1/+</sup>). (D-E) Graphs of quantification of actin phenotypes of the indicated genotypes. Data were from the following genotypes: *pxt*<sup>-/+</sup> = *pxt*<sup>f01000</sup><sup>-/+</sup> and *pxt*<sup>EY03052</sup><sup>-/+</sup>, *ATGL*<sup>-/+</sup> = *bmm*<sup>1/+</sup>, *ATGL/pxt* = *bmm*<sup>1/pxt</sup><sup>f01000</sup> and *bmm*<sup>1/pxt</sup><sup>EY03052</sup>; *Jabba*<sup>-/+</sup> = *Jabba*<sup>z101/+</sup>; and *Jabba*<sup>-/+</sup>; *ATGL*<sup>-/+</sup> = *Jabba*<sup>z101/+</sup>; *bmm*<sup>1/+</sup>. Actin defects were quantified by scoring the penetrance of actin bundle and cortical actin defects. Scores were summed and the total binned into one of three categories: normal, mildly defective, and severely defective. For a detailed description of the quantification see the Materials and Methods and Supplemental Figure 1. \*\*\**p*<0.0001, Pearson's chi-squared test. Error bars, SD. Actin bundles and cortical actin are largely normal in the *ATGL*<sup>-/+</sup> and *pxt*<sup>-/+</sup> Stage 10B follicles (A-B, D-E). In contrast, *ATGL/pxt* Stage 10B follicles have stunted and incomplete bundles (green arrowheads) and breakdown of cortical actin (magenta arrowheads, B, D). Actin remodeling is normal in *Jabba*<sup>-/+</sup>; *ATGL*<sup>-/+</sup> Stage 10B follicles (C, E).



310

311 We also assessed dominant genetic interactions between ATGL and Jabba, and ATGL  
312 and PLIN2. We find that frequency of actin remodeling defects observed in the double  
313 heterozygotes (*Jabba*<sup>+/+</sup>; *ATGL*<sup>+/+</sup>) is similar to that seen in the single heterozygotes (Fig 7C,  
314 7E), indicating that Jabba and ATGL act in different pathways to regulate actin remodeling.  
315 Similarly, we find that PLIN2 and ATGL do not interact genetically (S5 Fig).

**S5 Fig. ATGL and PLIN2 regulate actin remodeling via separate pathways. (A-C)**

Maximum projections of three confocal slices of S10B follicles stained for F-Actin (phalloidin) in white, and DNA (DAPI) in cyan. Images were brightened by 30% to increase clarity. Scale bars=50µm. (A) *PLIN2*<sup>-/+</sup> (*Lsd-2*<sup>KG00149</sup><sup>-/+</sup>). (B) *ATGL*<sup>-/+</sup> (*bmm*<sup>1</sup><sup>-/+</sup>). (C) *PLIN2*<sup>-/+</sup>; *ATGL*<sup>-/+</sup> (*Lsd-2*<sup>KG00149</sup><sup>-/+</sup>; *bmm*<sup>1</sup><sup>-/+</sup>). (D) Graph of quantification of actin phenotypes of the indicated genotypes. Actin defects were quantified by scoring the penetrance of actin bundle and cortical actin defects. Scores were summed and the total binned into one of three categories: normal, mildly defective, and severely defective. For a detailed description of the quantification see the Materials and Methods and Supplemental Figure 1. ns=p>0.05, Pearson's chi-squared test. Error bars, SD. The level of actin defects in *PLIN2*<sup>-/+</sup>; *ATGL*<sup>-/+</sup> (C-D) is not significantly different from that in *PLIN2*<sup>-/+</sup> (A, D) or *ATGL*<sup>-/+</sup> (B, D).

316

317 Taken together, these data reveal an intricate relationship between Pxt and LD proteins  
318 in which activity of both is necessary for proper actin remodeling. Specifically, our data supports  
319 that three pathways control actin remodeling. PLIN2 regulates actin dynamics independently of  
320 Jabba, ATGL, and Pxt. Conversely, Pxt acts in two separate pathways with Jabba and ATGL to  
321 regulate actin remodeling (see Fig 10). While there are no obvious mechanisms for how Pxt and  
322 Jabba work together to regulate actin remodeling, ATGL may regulate the availability of the  
323 substrate, AA, necessary for PG production.

324

325 *AA is present in ovary triglycerides*

326 If ATGL is indeed responsible for generating the substrate for Pxt, our model implies that AA-  
327 containing triglycerides are present in *Drosophila* follicles. We therefore extracted lipids from  
328 wild-type and *ATGL* mutant ovaries and analyzed them by LC-MS/MS mass spectrometry.

329 Among the 98 different triglyceride species identified (STable 1), two contain a twenty-carbon  
330 FA with four double bonds (20:4), presumably AA. AA was relatively rare, making up on the  
331 order of 0.06-0.07% of all FAs detected in triglycerides (Fig 8A), with four FA species  
332 accounting for the bulk (~85%) of FAs: the mono-unsaturated palmitoleic (16:1) and oleic (18:1)  
333 acids, and the saturated myristic (14:0) and palmitic (16:0) acids. We did not detect AA in the  
334 phospholipids recovered in our analysis (data not shown).

**STable 1. Quantitation of triglyceride species in ovaries**

Column A lists the fatty acid content of various triglyceride species detected in ovaries by lipidomics.

Columns B through H show the relative amount of those species in three wild-type and four ATGL<sup>-/-</sup> samples. Reads are background corrected. A fourth wild-type sample was discarded as an outlier because the detected lipid amounts were an order of magnitude lower than in the other samples.

**Fig 8. Ovary triglycerides contain arachidonic acid. (A-F)** Lipids were extracted from wild-type and ATGL<sup>-/-</sup> (*bmm<sup>1</sup>/bmm<sup>1</sup>*) ovaries and analyzed by mass spectrometry. Error bars, SD. **(A)** Abundance of individual fatty acids in triglycerides expressed as fraction of all such fatty acids; significance evaluated using Sidak's multiple comparisons test. **(B)** Total amount of saturated (SF), monounsaturated (MUFA) or polyunsaturated (PUFA) fatty acids relative to all fatty acids in triglycerides; significance evaluated using Tukey's multiple comparisons test. **(C)** Levels of the three phospholipid classes phosphatidylcholine (PC), phosphatidylethanolamine (PE), and phosphatidylinositol (PI); significance evaluated using Sidak's multiple comparisons test. **(D)** Overall triglyceride levels. ns =  $p = 0.1239$ , unpaired t-test, two-tailed. **(E)** Thin layer chromatograph of whole-lipid extracts from Stage 14 follicles of the indicated genotypes. **(F)** Quantitation of the triacylglycerol (TAG) to cholesterol ratio in (D).  $*p=0.0477$ , Dunnett's multiple comparisons test. **(G, H)** Quantification of two triglyceride species containing arachidonic acid (AA).  $*p=0.0419$ ,  $**p=0.0019$ , unpaired t-tests, two-tailed. Wild-type and ATGL mutant ovaries exhibit a similar abundance of fatty acids in triglycerides (A, B), phospholipids (C), and total triglycerides (D) by lipidomic analysis. Similarly, thin layer chromatographic analysis of Stage 14 follicles reveals no significant differences in triglycerides (E-F). However, two AA-containing triglyceride species are present in wild-type ovaries, and their levels are elevated in the absence of ATGL (G, H).

335  
336 Our lipidomic analysis did not uncover a significant difference in the content of  
337 phospholipids (Fig 8C) or of total triglycerides (Fig 8D) between wild-type and ATGL mutant  
338 ovaries. The overall FA profile in triglycerides was also similar between the two genotypes (Fig  
339 8A-B). In addition, there was no significant difference in total triglycerides in Stage 14 oocytes,

340 as detected by thin layer chromatography (Fig 8E-8F), even though we could confirm the  
341 previously described reduced triglyceride loading in PLIN2 mutants [18]. Thus, ATGL mediated  
342 lipolysis during oogenesis does not appear to lead to bulk turnover of LDs and may be restricted  
343 to supporting lipid signaling.

344 However, wild-type and *ATGL* mutant ovaries exhibited differences in the AA-containing  
345 triglycerides, both of which were elevated in the absence of ATGL (Fig 8G-8H). This trend  
346 persisted even when measurements were normalized to total triglycerides (not shown) or all  
347 lipids in the sample (S6A-S6B Fig). These observations are consistent with the possibility that in  
348 the *ATGL* mutants less AA is released from triglycerides, resulting in a reduced pool of free AA  
349 available for signaling or phospholipid production.

**S6 Fig. AA-containing TAG and total TAG normalized to total lipids in sample.** Lipids were extracted from wild-type and *ATGL*<sup>-/-</sup> (*bmm*<sup>1</sup>/*bmm*<sup>1</sup>) ovaries and analyzed by mass spectrometry. Data from main Figure 8 has been re-plotted as relative abundance normalized to total lipids in the sample. Error bars, SD. **(A, B)** Two triglyceride species containing arachidonic acid (AA). Error bars, SD, \**p*=0.0279, \*\**p*=0.0019, unpaired t-tests, two-tailed. **(C)** Overall triglyceride levels are slightly increased in *ATGL*<sup>-/-</sup> ovary lipids. Error bars, SD, \*\**p*=0.002, unpaired t-test, two-tailed. **(D)** Relative amounts of phosphatidylcholine (PC), phosphatidylethanolamine (PE), and phosphatidylinositol (PI) in wild-type versus *ATGL*<sup>-/-</sup> ovary lipids. Error bars, SD, \**p*=0.0329, \**p*=0.0416, \*\*\**p*=0.0001, Sidak's multiple comparisons test. While overall triglyceride levels are similar between the two genotypes (C), the AA-containing triglycerides are increased (A, B), and three classes of phospholipids are decreased (D) in the absence of ATGL. The reason for the decrease in phospholipids is not clear. One possibility is that ATGL breaks down triglycerides to generate precursors for phospholipid production; alternatively, in the absence of ATGL, ovaries may contain a different mix of follicle stages (and thus different levels of triglyceride accumulation) due to altered developmental progression.

350

351 *ATGL limits arachidonic acid levels to control PG-dependent actin remodeling*

352 We hypothesize that ATGL acts on LD triglycerides to release AA, which then serves as the  
353 substrate for Pxt-dependent PG production; PG, in turn, controls actin remodeling necessary for  
354 follicle development. Thus, the actin defects due to reduction or loss of ATGL, or co-reduction in  
355 ATGL and Pxt should be suppressed by exogenous free AA.

356 We utilized our *in vitro* egg maturation (IVEM) assay, in which isolated Stage 10B  
357 follicles mature *in vitro* in a simple culture medium [45]. One of its key components is fetal  
358 bovine serum (FBS), which supplies numerous nutrients and growth factors. Using this assay,  
359 we find that the majority of Stage 10B follicles from single heterozygotes of *pxt* and *ATGL*  
360 develop *in vitro*, while 55% of the follicles from double heterozygotes fail to develop (S7 Fig).  
361 These data recapitulate what we observed when we quantitatively assessed the actin defects in  
362 the double heterozygotes (Fig 7B, 7D). To test if *ATGL* supplies AA for PG production, we  
363 hoped to use the IVEM assay to determine if exogenous AA rescues follicle development in the  
364 double heterozygotes (*pxt/ATGL*). Unfortunately, this experiment yielded highly variable results  
365 (data not shown), likely because FBS contains unknown amounts of FAs, including AA.

**S7 Fig. *ATGL* and *Pxt* genetically interact in the *in vitro* egg maturation assay.** Graph of the percentage of Stage 10B follicles developing *in vitro*, normalized to wild-type (*yw*) development, for the following genotypes: *ATGL*<sup>-/+</sup> (*bmm*<sup>1</sup><sup>-/+</sup>), *pxt*<sup>-/+</sup> (*pxt*<sup>f01000</sup><sup>-/+</sup>), and *ATGL/pxt* (*bmm*<sup>1</sup>/*pxt*<sup>f01000</sup>). *ATGL/pxt* follicle development is reduced by ~50% compared to the *ATGL*<sup>-/+</sup> and *pxt*<sup>-/+</sup> controls.

366  
367 As an alternative approach, we reduced the amount of FBS in the medium and assessed  
368 follicle response to exogenous free AA (Fig 9A). At ~60μM, a slightly higher percentage of  
369 follicles developed than in control medium, but that fraction dropped steadily as AA  
370 concentrations were raised further. This finding indicates that high levels of AA are toxic to  
371 follicle development; AA is known to be cytotoxic for cultured cells, at least in part due to  
372 pleotropic effects unrelated to PG production [46].

373

**Fig 9. ATGL controls free arachidonic acid. (A)** Graph of the percentage of wild-type (*yw*) Stage 10B follicles that develop *in vitro* in control (EtOH, ethanol) or arachidonic acid (AA) media. Error bars, SD. **(B-C')** Maximum projection of three confocal slices of wild-type (*yw*) S10B follicles treated with either IVEM medium containing EtOH or 500 $\mu$ M AA for 1 hour and stained for LDs (Nile red) in white; B' and C' are zoomed in images of the boxed regions in B and C. All images were brightened by 70% to improve visibility. B and C, scale bars=50 $\mu$ m. B' and C', scale bars=10 $\mu$ m. **(D)** Graph of quantification of LD clustering in nurse cells of wild-type (*yw*) S10B follicles exposed to either EtOH or 500 $\mu$ M AA for one hour. Pearson's chi-square test,  $p>0.05$ . **(E)** Schematic depicting the rationale of the experimental approach used in F (created with Biorender.com). **(F)** Graph of relative percentage of follicles from the indicated genotypes developing in 500 $\mu$ M AA media versus control media (EtOH). Genotypes tested are wild-type (*yw*), *pxt*<sup>-/+</sup> (*pxt*<sup>f01000</sup>/+), *ATGL*<sup>-/+</sup> (*bmm*<sup>1</sup>/+), and *ATGL/pxt* (*bmm*<sup>1</sup>/*pxt*<sup>f01000</sup>). Error bars=SD. \* $p<0.05$ , \*\* $p<.001$  by paired t-test. Wild-type follicle development, *in vitro*, is inhibited with increasing AA concentration (A). Exposure to high doses of AA causes LD clustering (C-D), suggesting AA is accumulating in the LDs. If the release of AA from LDs is mediated by ATGL, and this free AA contributed to impairing *in vitro* follicle development when exogenous AA is provided, then reducing ATGL will improve the percentage of follicles developing (E). While reducing Pxt does not alter the relative percentage of follicles developing in 500 $\mu$ M AA media compared to wild-type follicles, reducing ATGL alone or in combination with reduced Pxt results in increased follicle development compared to wild-type follicles (F).

374

375 In other systems, exogenous AA is initially stored in LDs [40, 47, 48]. Similarly, we find  
376 that high-doses of AA (500 $\mu$ M AA) result in LD clustering in 60% of the follicles, and perhaps an  
377 increase in LD size (Fig 9B-9D). These observations are consistent with the notion that some  
378 exogenous free AA can be sequestered by LDs, but at higher levels AA inhibits follicle  
379 development.

380 The dose-dependent AA inhibition of follicle development provided a new approach to  
381 determine the contribution of ATGL in this system. We reasoned that if ATGL is required to  
382 release AA from internal stores and thus generate free AA, then reducing ATGL levels will  
383 partially suppress the inhibition of follicle development by high levels of exogenous AA (Fig 9E)  
384 as total free AA levels will be lower. We find that development of *pxt* heterozygous follicles is  
385 impaired to the same level as wild-type follicles in the presence of 500 $\mu$ M AA (Fig 9F). In  
386 contrast, two-fold more Stage10B follicles from *ATGL* heterozygotes or double heterozygotes of

387 *ATGL* and *pxt* develop in the presence of 500 $\mu$ M AA than wild-type follicles (Fig 9F). These data  
388 are consistent with the model that *ATGL* releases AA, which is required for PG production (Fig  
389 10). These PGs then regulate actin remodeling necessary for follicle development.  
390

**Fig 10. LD proteins regulate actin remodeling via three pathways.** Schematic (created with Biorender.com) summarizing the findings presented. Synthesis of TAG (triglyceride) by DGAT1 (magenta) leads to accumulation of TAG between the inner and outer leaflets of the ER membrane (dashed inset=zoomed in schematic) and eventually LD budding from the ER. Arachidonic acid (AA, red lines) is stored either in the form of TAG or is incorporated into the phospholipid membrane. We identified three pathways by which LD proteins regulate actin remodeling. In the first, PLIN2 (blue) regulates actin remodeling by a PG-independent pathway. In the second, Jabba (green) and Pxt act together to regulate actin remodeling, but the precise nature of this relationship is unknown (dashed arrow). In the third pathway, *ATGL* (red) can liberate AA from TAG stored in LDs, providing the substrate, either directly or indirectly, for Pxt and PG production (orange) to regulate actin remodeling. The AA freed from TAG by *ATGL* (red) could be supplied directly to Pxt or be first incorporated into phospholipids (surrounding the neutral lipid core of LDs or present in the ER or other cellular membranes). In a second step, cPLA2 can then release AA from these phospholipids to provide the substrate for PG production.

## 391 Discussion

392 Our data reveal that multiple LD proteins have critical roles in regulating actin cytoskeletal  
393 dynamics during *Drosophila* follicle development. Loss of either ATGL, PLIN2, or Jabba results  
394 in cortical actin breakdown, cortical contraction failure, and defective actin bundle formation  
395 during Stage 10B of oogenesis (Fig 3). This phenotype is uncommon, but is observed in flies  
396 lacking Pxt, the *Drosophila* COX-like enzyme [26]. Dominant genetic interactions reveal that  
397 LDs participate in three distinct pathways to regulate actin remodeling (Fig 10): PLIN2 acts  
398 independent of PGs, and Jabba and ATGL act in two separate PG-dependent pathways (Figs 5  
399 and 7). For the ATGL-dependent pathway, we provide evidence that ATGL controls actin  
400 remodeling by regulating the availability of AA for PG synthesis (Fig 9). While PG signaling is  
401 known to have a conserved role in regulating actin remodeling across organisms and cell-types  
402 [49-54], this study provides the first evidence linking LDs to PG-dependent actin remodeling.

403

### 404 LDs provide the substrate for PG production

405 The rate limiting step for PG production is the enzymatic release of AA from cellular lipids [8,  
406 27]. To explain the genetic interaction between Pxt and the triglyceride lipase ATGL, we  
407 propose that ATGL regulates the release of AA from triglyceride stores, and that this AA serves  
408 – directly or indirectly – as substrate for Pxt-dependent PG production. Consistent with our  
409 model, we detect triglycerides containing AA in the ovary (Fig 8) and find that the toxic effect of  
410 exogenous AA on development is modulated by ATGL levels (Fig 9). While 500 $\mu$ M AA severely  
411 impairs *in vitro* wild-type follicle development, reducing ATGL dosage significantly increases the  
412 number of developing follicles (Fig 9F). These finding suggest that release of endogenous AA is  
413 impaired in ATGL-/+ follicles and therefore total free AA levels do not as readily reach toxic  
414 levels (Fig 9E); free AA is likely toxic due to its many diverse roles in cellular signaling [55, 56].

415 Our studies also provide the first evidence that AA has a functional role during  
416 *Drosophila* oogenesis: AA is present in ovary triglycerides; exogenous AA has both beneficial

417 and detrimental effects on follicle development, depending on concentration; and ATGL  
418 heterozygosity shifts the sensitivity of follicles to exogenous AA (Figs. 8 and 9). These findings  
419 are particularly important as it has been debated whether AA is present in flies. Some studies  
420 report that AA is not detectable in various life stages and body parts [57-59], while others find it  
421 [60-62]. These differences may be due to varying detection sensitivities and the fact that lipid  
422 profiles vary dramatically between tissues and/or on different diets [63].

423         The free AA that serves as Pxt substrate might originate from two different sources:  
424 phospholipids and triglycerides. In mammalian systems, both sources make contributions to PG  
425 synthesis [47]. Cytoplasmic phospholipase A2 (cPLA2) releases AA from phospholipids, and in  
426 many cell types, inhibiting cPLA2 severely impairs PG production [64-66]. Conversely,  
427 knockdown/inhibition of ATGL decreases PG production in mast cells [28] and leukocytes [29].  
428 The AA released by ATGL might either directly serve as substrate for PG synthesis, or it might  
429 first be incorporated into phospholipids, to be released by cPLA2 in a subsequent step (Fig 10).

430         The site of PG synthesis in *Drosophila* Stage 10B nurse cells remains to be determined.  
431 In a variety of mammalian cell types, the PG synthesis machinery localizes to LDs [40]. For  
432 example, cPLA2, and its activators, localize to LDs and provide AA for PG production [67, 68],  
433 and COX2 and PGE<sub>2</sub> synthases localize to and produce PGE<sub>2</sub> on LDs in cultured colon  
434 adenocarcinoma cells [69]. Similarly, PGE<sub>2</sub> production is observed on LDs in normal rat  
435 intestinal epithelial cells [67] and in macrophages during parasitic infection [70]. In fly ovaries,  
436 PG may also be produced directly on LDs, or LDs may regulate the concentration of AA-  
437 containing phospholipids and free AA and thus indirectly control PG synthesis on the ER. As the  
438 cytoplasm of Stage 10B follicles is full of both ER and LDs (S4A-S4A''' and S4E-S4E''' Fig), the  
439 two organelles are in very close proximity; in addition, in many cells, LDs remain physically  
440 connected to the ER via lipidic bridges, which could convey AA or AA-containing phospholipids  
441 to the ER [71]. Further, although we do not observe enrichment of Pxt on LDs by  
442 immunofluorescence or biochemical purification (Fig 6), these observations do not rule out that



443 a fraction of Pxt is intimately associated with LDs. To resolve exactly where in nurse cells PG  
444 synthesis occurs, it will be important to determine if cPLA2 and PG-type specific synthases are  
445 enriched on LDs or elsewhere and to directly visualize the site of PG production.

446

#### 447 Why LDs?

448 As Pxt resides in the ER and AA can be released from ER phospholipids, why would the  
449 organism use LDs to control AA availability? LDs are increasingly recognized as a critical way  
450 station during FA trafficking in cells [11] and often transiently sequester excess FAs from  
451 external and internal sources to prevent cellular damage, such as ER stress and mitochondrial  
452 dysfunction [72, 73]. Once safely stored in LDs, FAs can then be released in a regulated  
453 manner and directed to specific intracellular fates, like energy production or signaling [74, 75].  
454 Thus, LDs serve as FA trafficking hubs to both channel FAs to the correct intracellular  
455 destinations and buffer the FA supply.

456 Proper channeling is particularly important for AA because it is cytotoxic, even at  
457 concentrations that overlap physiological ones [46]. For example, in cultured hippocampal  
458 neurons, low concentrations of AA support survival, but higher concentrations are quite toxic,  
459 much more so than other FAs [76]. This pattern also holds true for oogenesis: a recent study on  
460 bovine granulosa cells found that while low doses increase survival, high levels (200 $\mu$ M) induce  
461 apoptosis [77]. We observe the same trend when we incubate *Drosophila* follicles, *in vitro*, in  
462 AA. Low doses support a small increase in follicle development, while higher doses largely  
463 inhibit development (Fig 9A). This sensitivity to AA suggests that cells need to carefully buffer  
464 AA availability. Indeed, microscopic autoradiographic experiments reveal that in both immune  
465 and epithelial cells exogenous AA is initially almost exclusively incorporated into LDs, in both  
466 the phospholipid and neutral lipid pools [40, 47, 48].

467 We hypothesize that *Drosophila* follicles face a similar challenge. During Stages 9 and  
468 10, nurse cells generate tens of thousands of LDs (Fig 1A-C) from lipids taken up from the

469 hemolymph [22]. This massive influx of FAs presumably includes AA, and AA, like other FAs, is  
470 likely initially sequestered into LDs upon arrival. Exposing follicles to AA promoted LD clustering  
471 and possibly LD enlargement (Fig 9B-D), consistent with the idea that AA is taken up by the  
472 follicles and incorporated into LDs. Currently, we cannot tell if all the AA present in Stage 10B  
473 follicles passed through LDs at some point or whether some is incorporated into phospholipids  
474 directly. The penetrance and severity of actin defects in Stage 10B follicles of *ATGL* mutants is  
475 somewhat variable, but can approach those of *pvt* mutants (Fig 3). These data are consistent  
476 with the model that ATGL-dependent release of AA from LDs is a substantial, and possibly the  
477 primary, source of AA for PG production during late-stage *Drosophila* oogenesis.

478

#### 479 *ATGL* function in *Drosophila*

480 Given this critical role of ATGL in controlling PG synthesis during specific periods of *Drosophila*  
481 follicle development, it will be interesting to determine whether it contributes to PG signaling in  
482 other tissues. ATGL is best known for its role in fat storage [42] and is highly expressed in the  
483 larval and adult fat body, the adipose tissue of the fly. Loss of ATGL causes triglyceride  
484 overaccumulation in this tissue [42]. Notably, PG may be involved in regulating fat body  
485 development: normally, cells of the larval fat body persist through pupal stages and are cleared  
486 in early adulthood [78]; however, loss of *Pvt* results in their accumulation in adult abdomens  
487 (TLT, unpublished observation). In males, ATGL function in neurons and testes regulates  
488 whole-body energy storage by an as-yet uncharacterized mechanism thought to involve  
489 systemic signaling. And ectopic ATGL expression has beneficial roles in two *Drosophila* disease  
490 models, neurodegeneration due to mitochondrial dysfunction [79] and impairment of  
491 nephrocytes, components of the renal system, due to high fat diet [80]. Here, tissue-specific  
492 overexpression of ATGL in glia or nephrocytes, respectively, reverts disease-induced LD  
493 accumulation as well as disease phenotypes. Intriguingly, glia cells in other organisms activate  
494 PG signaling during brain inflammation/neurodegeneration [81, 82]. In the nephrocyte example,

495 ectopic ATGL affects transcription via lipid signaling, but exact mechanisms remain unknown.  
496 Our work identifies a specific signaling pathway, PG signaling, that is regulated by ATGL during  
497 oogenesis and provides evidence that AA is the relevant lipid released by ATGL. It will be  
498 important to determine how widely used this new signaling pathway is, given the strong potential  
499 for PGs to be playing roles in tissues with known ATGL functions.

500

#### 501 *LDs regulate actin remodeling via multiple mechanisms*

502 ATGL is not the only LD protein promoting actin remodeling in nurse cells. The actin  
503 cytoskeleton is similarly disturbed in mutants that lack two other LD proteins, Jabba and PLIN2  
504 (Fig 3). Our genetic interaction tests suggest that PLIN2 affects actin remodeling via a  
505 mechanism that does not involve PGs (Fig 5) and that Jabba and ATGL act in distinct PG-  
506 dependent pathways (Fig 7). Thus, neither PLIN2 nor Jabba are likely to regulate ATGL activity,  
507 suggesting the existence of additional mechanisms by which LDs control actin remodeling in  
508 nurse cells.

509 One such mechanism might be an alternate means of generating AA. This possibility  
510 seems unlikely for PLIN2 since there is no genetic interaction with Pxt. Jabba, however, might  
511 regulate a distinct lipase pathway that acts in parallel to ATGL to release AA. Indeed, Jabba has  
512 been proposed to regulate lipid metabolism in the ovary [38]. Jabba recruits numerous proteins  
513 to LDs [32, 33], which might include lipases or their regulators, such as the ATGL paralog Dob  
514 [42] or a cPLA2 ortholog. Another intriguing candidate is Hsl, an enzyme involved in the  
515 breakdown of sterol esters in *Drosophila* [83]. Hsl is among the most abundant proteins on  
516 maternally inherited LDs of early embryos [32], and its substrates, sterol esters, are present in  
517 ovary LDs (Fig 1K and 8E-8F).

518 Jabba might alternatively regulate the localization of PG synthesis machinery. The direct  
519 product of COX-like Pxt is the intermediate PGH<sub>2</sub> which is then converted by various synthases  
520 into PGs with distinct functions. Previous work suggests that Stage 9 follicles produce an

521 unknown PG that inhibits actin remodeling, while during Stage 10B  $\text{PGF}_{2\alpha}$  promotes remodeling  
522 [84]. Because Pxt relocalizes from the Golgi to the ER during this time (Fig 6), we hypothesize  
523 that these two compartments recruit different PG synthases, leading to the production of distinct  
524 PGs. If this hypothesis is correct, a role of Jabba might be to directly or indirectly control the  
525 targeting of PG synthases between these compartments, e.g., Jabba might recruit certain  
526 synthases to ER regions adjacent to LDs. Intriguingly, work in mammalian systems has  
527 suggested that spatial segregation of PG synthesis enzymes between Golgi and ER is  
528 functionally important [85].

529 A final possibility is that PLIN2 or Jabba regulate actin dynamics by recruiting actin and  
530 actin binding proteins to LDs. Actin and actin-regulators have been found in purified LD  
531 preparations in numerous biochemical and proteomic studies [e.g., 86, 87-89]. LDs might  
532 therefore regulate the concentration of these molecules free in the cytosol and thus their  
533 availability for actin assembly. If Jabba's ability to recruit these proteins is regulated by PG  
534 signaling, it would explain how Pxt and Jabba act in the same pathway. Further, since LDs are  
535 highly motile [88], including in nurse cells [1], they may deliver actin and its binding partners to  
536 sites of actin remodeling within the cell. Intriguingly, PLIN2 regulates LD transport during early  
537 *Drosophila* embryogenesis [90], and the extensive LD clustering in *Jabba* mutants may interfere  
538 with their motility (Fig 4C-4C", 4F).

539 While many questions remain, our findings have uncovered a critical role of LD proteins  
540 in regulating actin cytoskeletal remodeling. Given the conservation of ATGL and PLIN2 protein  
541 and metabolic functions, it is likely this new actin regulatory function is also conserved across  
542 organisms.

543

#### 544 LD dispersal

545 The intracellular distribution of LDs is highly regulated and can change with the cell cycle,  
546 developmental stage, and nutritional state [88, 91]. We find that PG signaling promotes LD

547 dispersal as loss of Pxt causes severe LD clustering in Stage 10B (Fig 4B-4B', 4F). Because LD  
548 clustering also occurs after just ~1hr treatment with the COX inhibitor aspirin (Fig 4G, 4H-H"),  
549 this phenotype is indeed due to loss of PG synthesis and signaling within the follicle, and is not  
550 an artifact of poor health of the follicles. These findings are exciting as there is little evidence yet  
551 in the literature that PGs regulate LDs. One study implicated PGE<sub>2</sub> signaling in inhibiting  
552 triglyceride storage in LDs in white adipose tissue [92]. Conversely, in granulosa cells of  
553 periovulatory follicles, PGE<sub>2</sub> upregulates PLIN2 [93]. And in human trophoblastic cells, COX2  
554 inhibition reduces LD production induced by the intracellular parasite *Toxoplasma gondii* [94].  
555 These limited studies suggest that PGs may have cell-type specific roles in regulating LD  
556 dynamics and lipid storage. Our results now reveal a dramatic effect of PGs on the spatial  
557 distribution of LDs in a genetically tractable model, setting the stage for a mechanistic dissection  
558 in the future.

559 PGs may regulate LD distribution by controlling actin dynamics. Indeed, actomyosin is  
560 known to regulate LD transport, distribution, and shape from plants to mammals [95-97]. In  
561 osteosarcoma cells, non-muscle myosin-dependent actin remodeling is required to drive  
562 clustered LDs apart [87]. Whether actin cytoskeletal dynamics regulate LDs during *Drosophila*  
563 oogenesis is unknown, but it is tempting to speculate that the LD clustering observed in *pxt*  
564 mutants is due to defective actin remodeling. Indeed, evidence suggests that PGs promote  
565 myosin activity during Stage 10B [98]. Alternatively, PGs may control ER integrity and/or LD  
566 biogenesis or lipolysis and thereby regulate LD distribution.

567 We also find that LD proteins regulate LD distribution. Specifically, loss of PLIN2 or  
568 Jabba causes dramatically clustered LDs (Fig 4). In embryos, LDs are normally dispersed in  
569 *PLIN2* mutants [90] and less dramatically clustered in *Jabba* mutants [33], suggesting that these  
570 proteins promote oogenesis-specific dispersal. A key question is whether the LD clustering is  
571 related to the disrupted actin remodeling observed in the LD protein mutants. We deem this  
572 unlikely, as the severity of LD clustering does not correlate with the level of actin defects when

573 the LD proteins are lost. For example, *Jabba* mutants have mild actin defects, but severe LD  
574 clustering, whereas *ATGL* mutants have limited LD clustering and severe actin defects (Figs 3,  
575 4, 5, and 7). Thus, we favor the model that the LD proteins regulate LD clustering at least in part  
576 independently of PG signaling controlled actin remodeling.

577 Live imaging of *ex vivo* follicles and inhibition of various cytoskeletal components will  
578 likely be critical to determine how LD clustering arises. For example, clustering may arise during  
579 LD biogenesis, if LDs originate from a limited region of the ER and do not disperse. *PLIN2*  
580 mutants have been proposed to exhibit LD biogenesis defects in nurse cells [18]. If like in  
581 oocytes and embryos, nurse cell LDs move along microtubules, defects in the arrangement of  
582 microtubules or in kinesin-1 and cytoplasmic dynein activity could also induce clustering [99-  
583 101]. *PLIN2* regulates the relative activity of these motors on embryonic LDs [90]. Alternatively,  
584 if like in osteosarcoma cells, LDs nucleate actin filaments to segregate from each other [87],  
585 *Jabba* and *PLIN2* may recruit actin and actin-regulators, and PG signaling may regulate their  
586 actin remodeling activity.

587

### 588 *LDs as regulators of development and female fertility*

589 Animal development requires careful regulation of metabolism, specific to tissue type and  
590 developmental stage [102]. Yet despite the fact that LDs have a central role in lipid metabolism  
591 and energy homeostasis in normal physiology and diseases [10, 11, 103], they have so far been  
592 implicated as regulators of development in only a handful of cases [23, 33, 37, 104]. Our  
593 analysis now reveals that LDs not only play a critical role at a specific transition during follicle  
594 development, but identifies PG signaling as one of the mechanisms by which they exert their  
595 regulatory role.

596 We speculate that this pathway is conserved across organisms. Indeed, LD  
597 accumulation, composition, and localization are dynamic during oocyte maturation [4, 12], LDs  
598 are hubs for FA trafficking, and FA levels (including that of AA) are critical for oocyte

599 development in many species [7, 13, 105]. Further, in both mouse models and human patients,  
600 metabolic syndrome causes LD clustering in oocytes, failures in oocyte maturation, and  
601 decreased fertility [13-15, 106, 107]. But does this relate to PG signaling? It is already well-  
602 established that PG signaling plays critical roles in oocyte development across organisms [108-  
603 114]. Recent evidence implicates LDs as a foci of PG production during reproduction. For  
604 example, COX enzymes localize to LDs in the rat corpus luteum [115], and in fetal membranes  
605 during advanced gestation and at induction of labor, times when PG synthesis and signaling are  
606 upregulated [116, 117]. In mammals, it is not yet known whether the PG effects on oogenesis  
607 and reproduction are due to changes in the actin cytoskeleton. However, cytoplasmic actin  
608 density and cortical actin thickness increase during oocyte maturation, contribute to meiotic  
609 resumption, and play roles in fertilization and early embryonic divisions [118, 119]. Given these  
610 data, and our findings connecting LDs, PG signaling, and actin remodeling during *Drosophila*  
611 oogenesis, we speculate the same pathways that regulate oocyte development in the fly are  
612 conserved across organisms to regulate oocyte development, and contribute to infertility issues  
613 due to limited or excess nutrition.

614

## 615 **Materials and Methods**

616

### 617 Fly stocks

618 Flies used in actin quantification and *in vitro* egg maturation experiments were maintained on  
619 cornmeal/agar/yeast food at room temperature except as noted below. Flies used in all other  
620 experiments were maintained on molasses/agar/yeast/malt extract/corn flour/soy flour food at  
621 room temperature except as noted below. Stocks used were *y<sup>1</sup>w<sup>1</sup>* (BDSC1495), Oregon R  
622 (BDSC 5), *pxt<sup>f01000</sup>* (Harvard Exelixis Collection, [120]), *pxt<sup>EY03052</sup>* (BDSC 15620), *Jabba<sup>DL</sup>* [33],  
623 *Jabba<sup>z101</sup>* [33], *bmm<sup>1</sup>* [34], *Lsd-2<sup>KG00149</sup>* (BDSC13382), *osk3-GAL4* (BDSC 44242), *DGAT1 RNAi*  
624 (TRiP.HMC06242, BDSC 65963), *mdy<sup>QX25</sup>* (BDSC5095), *mdy<sup>RF48</sup>* [16], *mat-alpha4 GAL4-VP16*

625 (BDSC 7063), *Lsd-2* RNAi (TRiP.HMS00629, BDSC 32846), *Lsd-2* RNAi (TRiP.HMS01292,  
626 BDSC 34617), *sqh-EYFP-ER* (BDSC7195, [121]), and *sqh-EYFP-Golgi* (BDSC7193, [121]). For  
627 the *DGAT1* RNAi germline knockdown, either mat-alpha4 GAL4-VP16>*DGAT1* RNAi or *osk3-*  
628 *GAL4*>*DGAT1* RNAi crosses were performed at room temperature. For mat-alpha4-GAL4  
629 knockdown, adult progeny were shifted to 29°C for 5 days and were fed on wet yeast paste  
630 (paste replaced once on day 2 or 3). For *osk3-GAL4* knockdown, progeny were fed wet yeast  
631 paste at room temp for 48 hours, then shifted to 29°C for 24 hours. Ovaries were subsequently  
632 dissected and treated as described.

633

#### 634 Immunofluorescence and fluorescent reagent staining

635 For Figures 1, 2, 4, 6, and Supplemental Figure 4 the following method, referred to as Staining  
636 Method 1, was used. Adult female and male flies (to allow for mating) younger than two weeks  
637 old were fed dry yeast for 48 hours at room temperature before ovary dissection in PBS-T  
638 (phosphate buffered saline, 0.1% Triton X-100), except for RNAi knockdown as noted above.  
639 Ovaries were fixed with 3.6% formaldehyde in PBS for 12 minutes at room temperature. Ovaries  
640 were washed with PBS-T, and follicles of desired stages were isolated using forceps and pin  
641 vises. Follicles were blocked in ovary block (10% BSA, PBS, 0.1% Triton X-100, 0.02% sodium  
642 azide) overnight at 4°C. Primary antibodies were diluted in ovary block and incubated overnight  
643 at 4°C. The following primary antibodies were obtained from the Developmental Studies  
644 Hybridoma Bank (DSHB) developed under the auspices of the National Institute of Child Health  
645 and Human Development and maintained by the Department of Biology, University of Iowa  
646 (Iowa City, Iowa): mouse anti-Calnexin99A at 1:1000 (Cnx99A 6-2-1, Munro, S.) and mouse  
647 anti-Golgin84 at 1:1000 (Golgin84 12-1, Munro, S.) [122]. Additionally, the following primary  
648 antibodies were used: rabbit anti-Jabba preabsorbed at 1:10 against *Jabba* *-/-* embryos in ovary  
649 block and used at 1:1000 [37] and rabbit anti-Pxt preabsorbed at 1:10 on *pxt* *-/-* ovaries in ovary  
650 block and used at 1:1000 [84]. Samples were washed 3x with PBS-T, and then protected from



651 light for the remainder of the experiment. Samples were incubated in the following secondary  
652 antibodies diluted to 1:1000 in ovary block overnight at 4°C: goat anti-rabbit IgG Alexa Fluor 633  
653 (Invitrogen), goat anti-mouse IgG Alexa Fluor 488 (Invitrogen), and goat anti-rabbit IgG Alexa  
654 Fluor 488 (Invitrogen). Samples were washed 3x with PBS-T and then stained with the following  
655 reagents diluted in ovary block: Phalloidin Alexa Fluor 633 (Invitrogen) 1:150, 1 hour at room  
656 temperature; Nile Red (1 mg/ml, Sigma-Aldrich) 1:50, 1 hour at room temperature; and Hoechst  
657 33342 (1 mg/ml, Thermo Fisher Scientific) 1:1000, 20 minutes room temperature. Samples were  
658 washed 3x with PBS-T, and then mounted on coverslips in Aqua Polymount (PolySciences).

659 For Figures 3, 5, 7, 9, and Supplemental Figures 1 and 5 the following protocol, referred  
660 to as Staining Method 2, was used: Adult female and male flies (to allow for mating) within 24hrs  
661 of eclosion were fed wet yeast paste for 72 hours at room temperature before dissection in  
662 room-temperature Grace's medium (Lonza). Ovaries were fixed in 4% paraformaldehyde in  
663 Grace's medium for 10 minutes at room temperature. Ovaries were washed 6x 10 minutes in  
664 antibody wash (1X PBS-T + 0.1% Bovine Serum Albumin (BSA)). Samples were stained  
665 overnight at 4°C with Alexa Fluor-488, -568, or -647 Phalloidin (Invitrogen) at 1:250. Samples  
666 were then washed 5-6 times in 1X PBS for 10 minutes each and stained with 4'6'-diamidino-2-  
667 phenylindole (DAPI, 5 mg/mL) at 1:5000 in 1X PBS for 10 minutes. Samples were rinsed in 1X  
668 PBS and mounted in 1 mg/mL phenylenediamine in 50% glycerol, pH 9 [123].

669

#### 670 Image acquisition and processing

671 Microscope images of fixed and stained *Drosophila* follicles were obtained using the following  
672 microscopes: Leica SPE confocal microscope with an ACS APO x20/0.60 IMM CORR-/D or  
673 ACS APO x40/1.5 oil CS objective (Leica Microsystems), Zeiss 700 confocal microscope or  
674 Zeiss 880 confocal microscope (Carl Zeiss Microscopy) using a Plan-Apochromat x20/0.8  
675 working distance (WD)=0.55 M27 objective, or Leica SP5 confocal microscope (Leica  
676 Microsystems) using an HCX PL APO CS 63.0x1.40 oil UV objective and Leica HyD detectors.

677 Maximum projections of images, image cropping, and image rotation were performed in  
678 Fiji/ImageJ software [124], scale bars were added in either Adobe Illustrator or Adobe  
679 Photoshop (Adobe, San Jose, CA) and figures were assembled using Adobe Illustrator. Images  
680 in Figures 3, 5, 7, and Supplemental Figures 1 and 5 were brightened by 30% and images in  
681 Figure 9 were brightened 70% in Adobe Photoshop to improve visualization.

682

### 683 Quantification of actin defects

684 Confocal images of phalloidin stained Stage 10B follicles were collected as described. Actin  
685 bundle and cortical actin defects were scored by scanning through confocal z-stacks of Stage  
686 10B follicles in ImageJ in a genotypically blinded manner. Representative images of follicles and  
687 scoring criteria are provided in Supplemental Figure 1. Briefly, actin bundles were scored as  
688 normal (score = 0) if they were straight, forming from the nurse cell plasma membrane and  
689 oriented inwards toward the nurse cell nuclei. Mild defects in bundling (score = 1) were defined  
690 as sparse bundle formation or slight delay in bundle growth relative to follicle development.  
691 Moderate defects (score = 2) were defined as collapsed, thick, and/or missing bundles from  
692 regions of the nurse cell plasma membrane. Severe defects (score=3) included those previously  
693 described, as well as a complete failure of bundles to form. Cortical actin was scored based on  
694 whether the cortical actin was intact or disrupted. Defects in cortical actin are evident by an  
695 absence or incomplete phalloidin staining between nurse cells and/or by nurse cell nuclei in  
696 close proximity or contacting each other. Normal cortical actin (score = 0) is defined as being  
697 completely intact and fully surrounding each nurse cell. Degree of severity of cortical actin  
698 defect was determined by the relative number of disruptions in cortical actin observed with mild  
699 defects (score=1) having a single instance, moderate defects (score=2) having two instances,  
700 and severe defects (score = 3) having three or more instances of disrupted cortical actin. The  
701 actin defect index (ADI) was then calculated by adding the bundle and cortical actin defect  
702 scores and binning them into normal (total score = 0-1), mildly defective (total score = 2-3), or

703 severely defective (score = 4-6). Pearson's chi-squared analysis was performed using R  
704 ([www.r-project.org](http://www.r-project.org)).

705

706 *In vitro egg maturation (IVEM) assay*

707 Adult female and male flies (to allow for mating) within 24hrs of eclosion were fed wet yeast  
708 paste daily for 3 days prior to dissection. Ovaries were dissected in room temperature Grace's  
709 medium (Lonza) containing 1x penicillin/streptomycin (100x, Gibco) and either 10% (S7 Fig) or  
710 2.5% (Fig 9) fetal bovine serum (FBS, Atlanta Biologicals); this is termed IVEM medium. Stage  
711 10B follicles were isolated and distributed between wells of a 24-well plastic tissue culture plate  
712 (Falcon) and 1ml of fresh media was added with no additions (S7 Fig), arachidonic acid (AA,  
713 Cayman Chemicals) diluted in 100% ethanol (EtOH) at the final concentrations listed, or an  
714 equivalent amount of EtOH. Follicles were incubated overnight at room temperature in the dark.  
715 The next day the number of follicles at each developmental stage were counted, and the  
716 percentage developing was calculated; follicles that reached Stage 12 and older were  
717 considered developed. For Supplemental Figure 7, the percent developing was normalized for  
718 each experiment to the percent of wild-type follicles developing. Statistical analysis was  
719 performed using the paired t-test function in Prism 8 (GraphPad Software).

720

721 *Aspirin or arachidonic treatment, staining, and phenotypic quantification of follicles*

722 Adult female and male flies (to allow for mating) within 24hrs of eclosion were fed wet yeast  
723 paste daily for 3 days prior to dissection. Ovaries were dissected in room temperature Grace's  
724 medium containing 1x penicillin/streptomycin and either 10% (Fig 4) or 2.5% (Fig 9) FBS. Stage  
725 10B follicles were isolated and transferred to wells of a 24 well plastic cell culture plate. Fresh  
726 medium was added to each well, to which 3mM aspirin (Cayman Chemicals) dissolved in EtOH  
727 or DMSO, 500µM AA (dissolved in EtOH), or the same volume of solvent was added. Follicles  
728 were incubated at room temperature in the dark for 1-1.5 hours. For Figure 4, samples were

729 stained with Phalloidin and Nile Red as described above in Staining Method 1. For Figure 9, the  
730 medium was removed and follicles were fixed in 4% paraformaldehyde in 1X PBS for 10  
731 minutes. Follicles were washed 3 times in PBS-T and stained for 2 hours at room temperature  
732 with Nile Red 1:5000 (1 mg/mL) and Alexa 647 Phalloidin 1:250 (Invitrogen). Follicles were then  
733 stained with DAPI (5 mg/mL) at 1:5000 in 1X PBS for 10 minutes and then washed 2 times in  
734 1X PBS. Samples were mounted in Aqua-Polymount (PolySciences, Inc.).

735 Confocal images of Stage 10B follicles were scored in a genotypically blinded manner  
736 for LD clustering and actin defects. LD clustering was scored based on the penetrance of the  
737 phenotype with normal defined as  $\leq 2$  nurse cells exhibiting clustering, mild being defined as 3 to  
738 4 nurse cells with clustering, and severe defined as  $>4$  nurse cells with clustering. Follicles were  
739 scored as having actin defects if actin bundle defects and/or disrupted cortical actin were  
740 observed. Pearson's chi squares analysis was performed using R.

741

#### 742 Western blots

743 Follicles from well-fed females of the indicated genotypes and stage were dissected and fixed  
744 as described in Staining Method 1. Note that proteins from such samples run at the same  
745 molecular weight as those from lysates prepared from live ovary tissue (S8 Fig). 25-50 follicles  
746 were collected per sample and boiled in sample buffer (Laemmli Sample Buffer, Bio-Rad + 2-  
747 mercaptoethanol, Bio-Rad). Samples were run on 4-15% gradient gels (Bio-Rad) at 80-120V  
748 and transferred onto PVDF membrane (Immobilon-FL, EMD Millipore) in either Towbin (10%  
749 Tris-Glycine + 20% MeOH; 80V for 30 minutes; for anti-PLIN2, anti-Pxt, anti-Calnexin) or CAPS  
750 (Sigma-Aldrich; 10mM CAPS + 20% MeOH; 50V for 40 minutes; for anti-Jabba) transfer buffer.  
751 Membranes were blocked for 1 hour at room temperature in Li-COR Odyssey Block (LI-COR  
752 Biosciences). Primary antibodies diluted in Odyssey Block were performed overnight at 4  
753 degrees. The following primary antibodies were used rabbit anti-Jabba (1:5000) [37], rabbit anti-  
754 Pxt (1:5000) [84], rabbit anti-PLIN2 (1:5000) [90], mouse anti-Calnexin99A (1:5000, DSHB),

755 Mouse anti- $\alpha$ -Tubulin (1:5000, Cell Signaling Technologies). Before use, anti-Jabba had been  
756 preabsorbed against PVDF membranes with samples from *Jabba* *-/-* ovaries. Membranes were  
757 washed 3 times in 1X PBS-0.1% Tween 20 (PBS-Tween). The following secondary antibody  
758 incubations were performed for 1 hour at room temperature: IRDye 800CW Goat anti-Rabbit  
759 IgG (1:5000, Li-COR), and IRDy3 680RD Goat anti-Mouse IgG (1:5000, Li-COR). After  
760 secondary antibody incubation, membranes were washed two times in PBS-Tween and once in  
761 1X PBS. Membranes were imaged on a Li-COR Odyssey CLx imager and blots were processed  
762 and quantified in Image Studio Lite 5.2 (Li-COR). To quantify, fluorescence intensity of each  
763 band was measured and normalized to respective experimental controls. Data were analyzed  
764 and plotted using Prism (GraphPad).

765

**S8 Fig. Immunoblots comparing live vs. fixed samples. (A-C)** Three simultaneously scanned immunoblots comparing the blotting patterns of live versus formaldehyde fixed wild-type whole-ovary samples, 5 ovaries per lane. **(A)** anti-Jabba immunoblot. **(B)** anti-Pxt immunoblot. **(C)** anti-PLIN2 immunoblot. The live vs. fixed banding pattern is comparable for all three antibodies tested. Fixed samples were used in S1 and S2 Fig immunoblots.

766

#### 767 Ovary centrifugation

768 Mated adult females of mixed ages fed dry yeast were anesthetized and beheaded before being  
769 mounted in Eppendorf tubes filled with 2.5% apple juice agar as described in [125]. Tubes were  
770 spun for 10 minutes at 10,000 rpm at room temperature using an Eppendorf Microcentrifuge  
771 (Model 5415D). Flies were removed from agar with forceps and ovaries were isolated and  
772 treated as described in Staining Method 1 above.

773

#### 774 Lipid droplet purification

775 250-300 ovaries per sample were rapidly dissected from mated and dry yeast fed females and  
776 kept on ice in TSS (68 mM Na Cl<sub>2</sub>, 0.03% Triton X-100) in 2mL Eppendorf tubes. Ovaries were  
777 then washed 3x with TKM (50 mM Tris, pH 7.4, 25 mM KCl, 5 mM MgCl<sub>2</sub>) to remove detergent.

778 TKM was removed and the volume of ovaries was estimated visually. Ovaries were kept on ice,  
779 to which were added: 2 times the estimated ovary volume of TKM + 1M sucrose, protease  
780 inhibitor cocktail to final concentration of 1X protease inhibitor cocktail (Sigma-Aldrich), and  
781 calyculin A serine/threonine phosphatase inhibitor (10 $\mu$ L per mL of volume; Cell Signaling).  
782 Ovaries were homogenized on ice by grinding with an automated tissue grinder (KONTES pellet  
783 pestle) for 1-2 minutes, and then 20 $\mu$ L ovary lysate samples were transferred from the total  
784 lysate to 0.65mL Eppendorf tubes and stored at -80°C. The remaining ovary lysates were spun  
785 at 13200rpm for 10 minutes in an Eppendorf Microcentrifuge (Model 5145D) at 4°C. The  
786 following was then added to samples slowly to avoid disturbing the LD layer: 300 $\mu$ L TKM + 0.5M  
787 sucrose, 300 $\mu$ L TKM + 0.25M sucrose, 400 $\mu$ L TKM (no sucrose). Tubes were spun for 20  
788 minutes at 4°C, with the speed adjusted as follows: 1000rpm for 5 minutes, 5000rpm for 5  
789 minutes, 13200rpm for 10 minutes. Purified LDs were then scooped off the top of the sucrose  
790 gradient using a drawn Pasteur pipette loop (Fisher Scientific, loop drawn by holding over a  
791 flame). LDs were washed off the pipette loop with 20 $\mu$ L TKM (no sucrose) and stored at -80°C  
792 until analyzed.

793 In past Western analyses, we loaded equal amounts of protein from LD preparations and  
794 original tissue lysate for easy comparison [33]. This approach was not feasible here because of  
795 the relatively low amounts of LDs recovered from the large volume of ovaries used. Instead, we  
796 compared the LD sample to dilutions of ovary lysate. Purified LDs and ovary lysates were  
797 diluted as indicated in 2X Laemmli Sample Buffer before being boiled for 30 minutes and  
798 subsequently run on 4-15% SDS-PAGE gradient gels (Western blot protocol as described  
799 above). Before the blocking step, the membrane was cut with a razor blade between 50 and  
800 75kDa and each half was treated separately. Quantification was performed as described above  
801 in Western blots.

802

803 Lipid extractions

804 25 ovaries per sample were dissected from mated, mixed-age, and dry yeast fed females and  
805 homogenized in a 2mL Eppendorf tube with a motorized pestle (KONTES pellet pestle) in 1X  
806 PBS and kept on ice. Lysates were then incubated 1:1 in a 2:1 chloroform/methanol mixture  
807 overnight at 4°C. Samples were spun in an Eppendorf Microcentrifuge (model 5415D) at max  
808 speed at room temperature for 1 minute, and the bottom organic layer was transferred to an  
809 0.65mL Eppendorf tube. Samples were then vacuum dried and either analyzed immediately or  
810 stored at -80°C for thin layer chromatography (TLC) analysis, or stored at -80°C before being  
811 shipped on dry ice for mass spectrometry analysis.

812

### 813 Thin layer chromatography

814 Evaporated lipids were resuspended in 10µL 2:1 chloroform/methanol and spotted on  
815 dehydrated silica plates (EMD Millipore; dehydrated by baking for 30 minutes at 100°C). Plates  
816 were placed in a chamber (Millipore Sigma/Sigma-Aldrich Z266000) pre-saturated for 30  
817 minutes with Petroleum Ether/Diethyl Ether/acetic acid (32:8:0.8) and allowed to develop until  
818 the solvent almost reached the top of the plates, and the solvent line was quickly marked with a  
819 pencil after removing plates from the chamber. The plates were then air-dried and briefly  
820 submerged in charring solution (50% ethanol, 3.2% H<sub>2</sub>SO<sub>4</sub>, 0.5% MgCl<sub>2</sub>). Plates were air-dried  
821 briefly and were charred for 30 minutes at 120°C. Plates were imaged using a Bio-Rad Gel Doc  
822 and bands were quantified using Fiji. Lipids were identified according to Knittelfelder & Kohlwein  
823 [126] and by comparing whole lipid extracts to lipid standards (Millipore Sigma, data not shown).  
824 Colorimetric band intensities were quantified in Fiji and triglyceride or sterol ester bands were  
825 normalized to cholesterol band intensity. Statistical tests were run in GraphPad Prism as  
826 follows: Figure 2D, Sidak's multiple comparisons test and Figure 8F, Dunnett's multiple  
827 comparisons test.

828

### 829 LC-MS/MS Mass Spectrometry Analysis

830 Extracted lipids were dissolved in corresponding volumes of 2:1 methanol:chloroform (v/v) and 5  
831  $\mu$ l of each sample was injected for positive and negative acquisition modes, respectively. Mobile  
832 phase A consisted of 3:2 (v/v) water/acetonitrile, including 10 mM ammonium formate and 0.1%  
833 formic acid, and mobile phase B consisted of 9:1 (v/v) 2- propanol/acetonitrile, also including 10  
834 mM ammonium formate and 0.1% formic acid. Lipids were separated using an UltiMate 3000  
835 UHPLC (Thermo Fisher Scientific) under a 90 min gradient; during 0–7 minutes, elution starts  
836 with 40% B and increases to 55%; from 7 to 8 min, increases to 65% B; from 8 to 12 min,  
837 elution is maintained with 65% B; from 12 to 30 min, increase to 70% B; from 30 to 31 min,  
838 increase to 88% B; from 31 to 51 min, increase to 95% B; from 51 to 53 min, increase to 100%  
839 B; during 53 to 73 min, 100% B is maintained; from 73 to 73.1 min, solvent B was decreased to  
840 40% and then maintained for another 16.9 min for column re-equilibration. The flow-rate was set  
841 to 0.2 mL/min. The column oven temperature was set to 55° C, and the temperature of the  
842 autosampler tray was set to 4° C. Eluted lipids were analyzed using Orbitrap Q Exactive  
843 (Thermo Fisher Scientific) Orbitrap mass analyzer. The spray voltage was set to 4.2 kV, and the  
844 heated capillary and the HESI were held at 320° C and 300° C, respectively. The S-lens RF  
845 level was set to 50, and the sheath and auxiliary gas were set to 35 and 3 units, respectively.  
846 These conditions were held constant for both positive and negative ionization mode  
847 acquisitions. External mass calibration was performed using the standard calibration mixture  
848 every 7 days. MS spectra of lipids were acquired in full-scan/data-dependent MS2 mode. For  
849 the full-scan acquisition, the resolution was set to 70,000, the AGC target was 1e6, the  
850 maximum integration time was 50 msec, and the scan range was  $m/z = 133.4\text{--}2000$ . For data-  
851 dependent MS2, the top 10 ions in each full scan were isolated with a 1.0 Da window,  
852 fragmented at a stepped normalized collision energy of 15, 25, and 35 units, and analyzed at a  
853 resolution of 17,500 with an AGC target of 2e5 and a maximum integration time of 100 msec.  
854 The underfill ratio was set to 0. The selection of the top 10 ions was subject to isotopic exclusion  
855 with a dynamic exclusion window of 5.0 sec. Mass spectrometry data was analyzed using



856 LipidSearch version 4.1 SP (Thermo Fisher Scientific). Identified lipid species with grade A and  
857 B were manually curated. A total of 98 different triglyceride species were identified (STable 1).

858 For the quantitative analysis in Figures 8A-AD, 8G-H and Supplemental Figure 6, four  
859 ovaries each from wild-type and *ATGL* mutant females were analyzed and the quantity of the 98  
860 triglyceride species determined, relative to background. One wild-type sample contained an  
861 order of magnitude less lipid and was discarded as an outlier (STable 1). In total, 25 different  
862 types of FAs were identified in the ovary triglycerides. The abundance of each FA was  
863 estimated by summing the amount of each triglyceride species containing that FA, weighted by  
864 how many times that FA is represented in that triglyceride. For Figures 8A-8B, this abundance is  
865 expressed as fraction of the total amount of fatty acids such identified. For Figure 8C, the signal  
866 for all species of phosphatidylcholine, phosphatidylethanolamine, and phosphatidylinositol,  
867 respectively, was summed and normalized to the average of the wild type. For Figure 8D, the  
868 signal for all triglyceride species was summed and normalized to the average of the wild type.  
869 To express the abundance of various lipid species relative to total lipids recovered (S6 Fig),  
870 values for various lipid species were divided by the sum of all lipids in the sample. For Figure  
871 8G and 8H, the signal for two AA-containing triglyceride species was computed, and normalized  
872 to the average of the wild-type signal. Amounts and fractions were calculated using Microsoft  
873 Excel and graphed using Prism 8 (GraphPad Software). Statistical tests for Figure 8 were as  
874 follows: 8A and 8C was Sidak's multiple comparisons test, 8B was Tukey's multiple  
875 comparisons test, 8D was an unpaired t-test, two-tailed, and 8G-H were unpaired t-tests, two-  
876 tailed.

877

878 **Acknowledgements:** We thank the Dunnwald lab for helpful discussions, and Dr. Martine  
879 Dunnwald, the Tootle lab and the Welte lab for helpful discussions and careful review of the  
880 manuscript. We are grateful to Marcus Kilwein for help with thin layer chromatography. We  
881 thank the Harvard T.H. Chan Advanced Multi-omics Platform at the Harvard T.H. Chan School

882 of Public Health for performing the lipidomics analysis. Stocks obtained from the Bloomington  
883 Drosophila Stock Center (NIH P40OD018537) were used in this study. At the University of Iowa,  
884 Information Technology Services – Research Services provided data storage support. This  
885 project is supported by National Institutes of Health (NIH) R01 GM116885 (T.L.T.) and R01  
886 GM12155 (M.A.W), as well as a PumpPrimerII grant from the University of Rochester (M.A.W).  
887 M.S.G. was partially supported by NIH T32 CA078586 Free Radical and Radiation Biology,  
888 University of Iowa.  
889

## 890 References

- 891 1. Lu W, Lakonishok M, Gelfand VI. Gatekeeper function for Short stop at the ring canals of  
892 the Drosophila ovary. *Curr Biol*. 2021. Epub 2021/06/06. doi: 10.1016/j.cub.2021.05.010.  
893 PubMed PMID: 34089646.
- 894 2. National Public Health Action Plan for the Detection, Prevention, and Management of  
895 Infertility. . Atlanta, Georgia: Centers for Disease Control and Prevention; 2014.
- 896 3. Brusentsev EY, Mokrousova VI, Igonina TN, Rozhkova IN, Amstislavsky SY. Role of  
897 Lipid Droplets in the Development of Oocytes and Preimplantation Embryos in  
898 Mammals. *Russian Journal of Developmental Biology*. 2019;50(5):230-7. doi:  
899 10.1134/S1062360419050102.
- 900 4. Dunning KR, Russell DL, Robker RL. Lipids and oocyte developmental competence: the  
901 role of fatty acids and beta-oxidation. *Reproduction*. 2014;148(1):R15-27. Epub  
902 2014/04/25. doi: 10.1530/REP-13-0251. PubMed PMID: 24760880.
- 903 5. Dunning KR, Akison LK, Russell DL, Norman RJ, Robker RL. Increased beta-oxidation  
904 and improved oocyte developmental competence in response to l-carnitine during  
905 ovarian in vitro follicle development in mice. *Biol Reprod*. 2011;85(3):548-55. Epub  
906 2011/05/27. doi: 10.1095/biolreprod.110.090415. PubMed PMID: 21613630.
- 907 6. Dunning KR, Cashman K, Russell DL, Thompson JG, Norman RJ, Robker RL. Beta-  
908 oxidation is essential for mouse oocyte developmental competence and early embryo  
909 development. *Biol Reprod*. 2010;83(6):909-18. Epub 2010/08/06. doi:  
910 10.1095/biolreprod.110.084145. PubMed PMID: 20686180.
- 911 7. Prates EG, Nunes JT, Pereira RM. A role of lipid metabolism during cumulus-oocyte  
912 complex maturation: impact of lipid modulators to improve embryo production. *Mediators  
913 Inflamm*. 2014;2014:692067. Epub 2014/04/16. doi: 10.1155/2014/692067. PubMed  
914 PMID: 24733963; PubMed Central PMCID: PMC3964899.
- 915 8. Tootle TL. Genetic insights into the in vivo functions of prostaglandin signaling. *The  
916 international journal of biochemistry & cell biology*. 2013;45(8):1629-32. Epub  
917 2013/05/21. doi: 10.1016/j.biocel.2013.05.008. PubMed PMID: 23685076.
- 918 9. Sugimoto Y, Inazumi T, Tsuchiya S. Roles of prostaglandin receptors in female  
919 reproduction. *J Biochem*. 2015;157(2):73-80. Epub 2014/12/07. doi: 10.1093/jb/mvu081.  
920 PubMed PMID: 25480981.
- 921 10. Walther TC, Farese RV, Jr. Lipid droplets and cellular lipid metabolism. *Annu Rev  
922 Biochem*. 2012;81:687-714. doi: 10.1146/annurev-biochem-061009-102430. PubMed  
923 PMID: 22524315; PubMed Central PMCID: PMC3767414.
- 924 11. Welte MA. Expanding roles for lipid droplets. *Curr Biol*. 2015;25(11):R470-81. Epub  
925 2015/06/03. doi: 10.1016/j.cub.2015.04.004. PubMed PMID: 26035793; PubMed Central  
926 PMCID: PMC3767414.
- 927 12. Ami D, Mereghetti P, Natalello A, Doglia SM, Zanoni M, Redi CA, et al. FTIR spectral  
928 signatures of mouse antral oocytes: molecular markers of oocyte maturation and  
929 developmental competence. *Biochim Biophys Acta*. 2011;1813(6):1220-9. Epub  
930 2011/03/26. doi: 10.1016/j.bbamcr.2011.03.009. PubMed PMID: 21435359.
- 931 13. Cardozo E, Pavone ME, Hirshfeld-Cytron JE. Metabolic syndrome and oocyte quality.  
932 *Trends Endocrinol Metab*. 2011;22(3):103-9. Epub 2011/02/01. doi:  
933 10.1016/j.tem.2010.12.002. PubMed PMID: 21277789.
- 934 14. Jungheim ES, Schoeller EL, Marquard KL, Loudon ED, Schaffer JE, Moley KH. Diet-  
935 induced obesity model: abnormal oocytes and persistent growth abnormalities in the  
936 offspring. *Endocrinology*. 2010;151(8):4039-46. Epub 2010/06/25. doi: 10.1210/en.2010-  
937 0098. PubMed PMID: 20573727; PubMed Central PMCID: PMC2940512.
- 938 15. Marei WFA, Smits A, Mohey-Elsaeed O, Pintelon I, Ginneberge D, Bols PEJ, et al.  
939 Differential effects of high fat diet-induced obesity on oocyte mitochondrial functions in

- 940 inbred and outbred mice. *Sci Rep.* 2020;10(1):9806. Epub 2020/06/20. doi:  
941 10.1038/s41598-020-66702-6. PubMed PMID: 32555236; PubMed Central PMCID:  
942 PMCPMC7299992.
- 943 16. Buszczak M, Lu X, Segreaves WA, Chang TY, Cooley L. Mutations in the midway gene  
944 disrupt a *Drosophila* acyl coenzyme A: diacylglycerol acyltransferase. *Genetics.*  
945 2002;160(4):1511-8. Epub 2002/04/26. PubMed PMID: 11973306; PubMed Central  
946 PMCID: PMCPMC1462074.
- 947 17. Buszczak M, Cooley L. Eggs to die for: cell death during *Drosophila* oogenesis. *Cell*  
948 *Death Differ.* 2000;7(11):1071-4. Epub 2001/01/04. doi: 10.1038/sj.cdd.4400755.  
949 PubMed PMID: 11139280.
- 950 18. Teixeira L, Rabouille C, Rorth P, Ephrussi A, Vanzo NF. *Drosophila* Perilipin/ADRP  
951 homologue Lsd2 regulates lipid metabolism. *Mech Dev.* 2003;120(9):1071-81. Epub  
952 2003/10/11. doi: 10.1016/s0925-4773(03)00158-8. PubMed PMID: 14550535.
- 953 19. Guild GM, Connelly PS, Shaw MK, Tilney LG. Actin filament cables in *Drosophila* nurse  
954 cells are composed of modules that slide passively past one another during dumping. *J*  
955 *Cell Biol.* 1997;138(4):783-97. Epub 1997/08/25. doi: 10.1083/jcb.138.4.783. PubMed  
956 PMID: 9265646; PubMed Central PMCID: PMCPMC2138051.
- 957 20. Huelsmann S, Ylanne J, Brown NH. Filopodia-like actin cables position nuclei in  
958 association with perinuclear actin in *Drosophila* nurse cells. *Developmental cell.*  
959 2013;26(6):604-15. Epub 2013/10/05. doi: 10.1016/j.devcel.2013.08.014. PubMed  
960 PMID: 24091012; PubMed Central PMCID: PMCPMC3791400.
- 961 21. Wheatley S, Kulkarni S, Karess R. *Drosophila* nonmuscle myosin II is required for rapid  
962 cytoplasmic transport during oogenesis and for axial nuclear migration in early embryos.  
963 *Development.* 1995;121(6):1937-46. Epub 1995/06/01. PubMed PMID: 7601006.
- 964 22. Parra-Peralbo E, Culi J. *Drosophila* lipophorin receptors mediate the uptake of neutral  
965 lipids in oocytes and imaginal disc cells by an endocytosis-independent mechanism.  
966 *PLoS Genet.* 2011;7(2):e1001297. Epub 2011/02/25. doi:  
967 10.1371/journal.pgen.1001297. PubMed PMID: 21347279; PubMed Central PMCID:  
968 PMCPMC3037410.
- 969 23. Stephenson RA, Thomalla JM, Chen L, Kolkhof P, White RP, Beller M, et al.  
970 Sequestration to lipid droplets promotes histone availability by preventing turnover of  
971 excess histones. *Development.* 2020.
- 972 24. McCall K. Eggs over easy: cell death in the *Drosophila* ovary. *Dev Biol.* 2004;274(1):3-  
973 14. Epub 2004/09/10. doi: 10.1016/j.ydbio.2004.07.017. PubMed PMID: 15355784.
- 974 25. Spracklen AJ, Tootle TL. *Drosophila* – a model for studying prostaglandin signaling. In:  
975 Yokomizo T, Murakami M, editors. *Bioactive Lipid Mediators: Current Reviews and*  
976 *Protocols: Springer Protocols*; 2015. p. 181-97.
- 977 26. Tootle TL, Spradling AC. *Drosophila* Pxt: a cyclooxygenase-like facilitator of follicle  
978 maturation. *Development.* 2008;135(5):839-47. Epub 2008/01/25. doi:  
979 10.1242/dev.017590. PubMed PMID: 18216169; PubMed Central PMCID:  
980 PMCPMC2818214.
- 981 27. Funk CD. Prostaglandins and leukotrienes: advances in eicosanoid biology. *Science.*  
982 2001;294(5548):1871-5. Epub 2001/12/01. doi: 10.1126/science.294.5548.1871.  
983 PubMed PMID: 11729303.
- 984 28. Dichlberger A, Schlager S, Maaninka K, Schneider WJ, Kovanen PT. Adipose  
985 triglyceride lipase regulates eicosanoid production in activated human mast cells. *J Lipid*  
986 *Res.* 2014;55(12):2471-8. Epub 2014/08/13. doi: 10.1194/jlr.M048553. PubMed PMID:  
987 25114172; PubMed Central PMCID: PMCPMC4242440.
- 988 29. Schlager S, Goeritzer M, Jandl K, Frei R, Vujic N, Kolb D, et al. Adipose triglyceride  
989 lipase acts on neutrophil lipid droplets to regulate substrate availability for lipid mediator

- 990 synthesis. *J Leukoc Biol.* 2015;98(5):837-50. Epub 2015/06/26. doi: 10.1189/jlb.3A0515-  
991 206R. PubMed PMID: 26109679; PubMed Central PMCID: PMCPMC4594763.
- 992 30. Yen CL, Stone SJ, Koliwad S, Harris C, Farese RV, Jr. Thematic review series:  
993 glycerolipids. DGAT enzymes and triacylglycerol biosynthesis. *J Lipid Res.*  
994 2008;49(11):2283-301. Epub 2008/09/02. doi: 10.1194/jlr.R800018-JLR200. PubMed  
995 PMID: 18757836; PubMed Central PMCID: PMCPMC3837458.
- 996 31. Chintapalli VR, Wang J, Dow JA. Using FlyAtlas to identify better *Drosophila*  
997 melanogaster models of human disease. *Nat Genet.* 2007;39(6):715-20. Epub  
998 2007/05/31. doi: 10.1038/ng2049. PubMed PMID: 17534367.
- 999 32. Cermelli S, Guo Y, Gross SP, Welte MA. The lipid-droplet proteome reveals that droplets  
1000 are a protein-storage depot. *Curr Biol.* 2006;16(18):1783-95. Epub 2006/09/19. doi:  
1001 10.1016/j.cub.2006.07.062. PubMed PMID: 16979555.
- 1002 33. Li Z, Thiel K, Thul PJ, Beller M, Kuhnlein RP, Welte MA. Lipid droplets control the  
1003 maternal histone supply of *Drosophila* embryos. *Curr Biol.* 2012;22(22):2104-13. Epub  
1004 2012/10/23. doi: 10.1016/j.cub.2012.09.018. PubMed PMID: 23084995; PubMed Central  
1005 PMCID: PMCPMC3513403.
- 1006 34. Gronke S, Beller M, Fellert S, Ramakrishnan H, Jackle H, Kuhnlein RP. Control of fat  
1007 storage by a *Drosophila* PAT domain protein. *Curr Biol.* 2003;13(7):603-6. Epub  
1008 2003/04/05. doi: 10.1016/s0960-9822(03)00175-1. PubMed PMID: 12676093.
- 1009 35. Beller M, Bulankina AV, Hsiao HH, Urlaub H, Jackle H, Kuhnlein RP. PERILIPIN-  
1010 dependent control of lipid droplet structure and fat storage in *Drosophila*. *Cell Metab.*  
1011 2010;12(5):521-32. Epub 2010/11/03. doi: 10.1016/j.cmet.2010.10.001. PubMed PMID:  
1012 21035762.
- 1013 36. Bi J, Xiang Y, Chen H, Liu Z, Gronke S, Kuhnlein RP, et al. Opposite and redundant  
1014 roles of the two *Drosophila* perilipins in lipid mobilization. *J Cell Sci.* 2012;125(Pt  
1015 15):3568-77. Epub 2012/04/17. doi: 10.1242/jcs.101329. PubMed PMID: 22505614.
- 1016 37. Johnson MR, Stephenson RA, Ghaemmaghami S, Welte MA. Developmentally  
1017 regulated H2Av buffering via dynamic sequestration to lipid droplets in *Drosophila*  
1018 embryos. *Elife.* 2018;7. Epub 2018/07/26. doi: 10.7554/eLife.36021. PubMed PMID:  
1019 30044219; PubMed Central PMCID: PMCPMC6089599.
- 1020 38. McMillan EA, Longo SM, Smith MD, Broskin S, Lin B, Singh NK, et al. The protein  
1021 kinase CK2 substrate Jabba modulates lipid metabolism during *Drosophila* oogenesis. *J*  
1022 *Biol Chem.* 2018;293(8):2990-3002. Epub 2018/01/13. doi: 10.1074/jbc.M117.814657.  
1023 PubMed PMID: 29326167; PubMed Central PMCID: PMCPMC5827434.
- 1024 39. Groen CM, Spracklen AJ, Fagan TN, Tootle TL. *Drosophila* Fascin is a novel  
1025 downstream target of prostaglandin signaling during actin remodeling. *Mol Biol Cell.*  
1026 2012;23(23):4567-78. Epub 2012/10/12. doi: 10.1091/mbc.E12-05-0417. PubMed PMID:  
1027 23051736; PubMed Central PMCID: PMCPMC3510018.
- 1028 40. Bozza PT, Bakker-Abreu I, Navarro-Xavier RA, Bandeira-Melo C. Lipid body function in  
1029 eicosanoid synthesis: an update. *Prostaglandins Leukot Essent Fatty Acids.*  
1030 2011;85(5):205-13. Epub 2011/05/14. doi: 10.1016/j.plefa.2011.04.020. PubMed PMID:  
1031 21565480.
- 1032 41. Jarc E, Petan T. A twist of FATE: Lipid droplets and inflammatory lipid mediators.  
1033 *Biochimie.* 2020;169:69-87. Epub 2019/12/02. doi: 10.1016/j.biochi.2019.11.016.  
1034 PubMed PMID: 31786231.
- 1035 42. Gronke S, Mildner A, Fellert S, Tennagels N, Petry S, Muller G, et al. Brummer lipase is  
1036 an evolutionary conserved fat storage regulator in *Drosophila*. *Cell Metab.*  
1037 2005;1(5):323-30. Epub 2005/08/02. doi: 10.1016/j.cmet.2005.04.003. PubMed PMID:  
1038 16054079.
- 1039 43. Brown JB, Boley N, Eisman R, May GE, Stoiber MH, Duff MO, et al. Diversity and  
1040 dynamics of the *Drosophila* transcriptome. *Nature.* 2014;512(7515):393-9. Epub

- 1041 2014/03/29. doi: 10.1038/nature12962. PubMed PMID: 24670639; PubMed Central  
1042 PMCID: PMCPMC4152413.
- 1043 44. Jambor H, Surendranath V, Kalinka AT, Mejstrik P, Saalfeld S, Tomancak P. Systematic  
1044 imaging reveals features and changing localization of mRNAs in *Drosophila*  
1045 development. *Elife*. 2015;4. Epub 2015/04/04. doi: 10.7554/eLife.05003. PubMed PMID:  
1046 25838129; PubMed Central PMCID: PMCPMC4384636.
- 1047 45. Spracklen AJ, Tootle TL. The utility of stage-specific mid-to-late *Drosophila* follicle  
1048 isolation. *J Vis Exp*. 2013;(82):50493. Epub 2013/12/12. doi: 10.3791/50493. PubMed  
1049 PMID: 24326735; PubMed Central PMCID: PMCPMC4011191.
- 1050 46. Pompeia C, Lima T, Curi R. Arachidonic acid cytotoxicity: can arachidonic acid be a  
1051 physiological mediator of cell death? *Cell Biochem Funct*. 2003;21(2):97-104. Epub  
1052 2003/05/09. doi: 10.1002/cbf.1012. PubMed PMID: 12736897.
- 1053 47. Weller PF, Dvorak AM. Lipid bodies: intracellular sites for eicosanoid formation. *J Allergy*  
1054 *Clin Immunol*. 1994;94(6 Pt 2):1151-6. Epub 1994/12/01. doi: 10.1016/0091-  
1055 6749(94)90325-5. PubMed PMID: 7798553.
- 1056 48. Bozza PT, Magalhaes KG, Weller PF. Leukocyte lipid bodies - Biogenesis and functions  
1057 in inflammation. *Biochim Biophys Acta*. 2009;1791(6):540-51. Epub 2009/05/07. doi:  
1058 10.1016/j.bbaliip.2009.01.005. PubMed PMID: 19416659; PubMed Central PMCID:  
1059 PMCPMC2693476.
- 1060 49. Peppelenbosch MP, Tertoolen LG, Hage WJ, de Laat SW. Epidermal growth factor-  
1061 induced actin remodeling is regulated by 5-lipoxygenase and cyclooxygenase products.  
1062 *Cell*. 1993;74(3):565-75. Epub 1993/08/13. doi: 10.1016/0092-8674(93)80057-l. PubMed  
1063 PMID: 8348619.
- 1064 50. Tamma G, Wiesner B, Furkert J, Hahm D, Oksche A, Schaefer M, et al. The  
1065 prostaglandin E2 analogue sulprostone antagonizes vasopressin-induced antidiuresis  
1066 through activation of Rho. *J Cell Sci*. 2003;116(Pt 16):3285-94. Epub 2003/06/28. doi:  
1067 10.1242/jcs.00640. PubMed PMID: 12829746.
- 1068 51. Bulin C, Albrecht U, Bode JG, Weber AA, Schror K, Levkau B, et al. Differential effects  
1069 of vasodilatory prostaglandins on focal adhesions, cytoskeletal architecture, and  
1070 migration in human aortic smooth muscle cells. *Arterioscler Thromb Vasc Biol*.  
1071 2005;25(1):84-9. Epub 2004/10/02. doi: 10.1161/01.ATV.0000146814.81581.68.  
1072 PubMed PMID: 15458982.
- 1073 52. Pierce KL, Fujino H, Srinivasan D, Regan JW. Activation of FP prostanoid receptor  
1074 isoforms leads to Rho-mediated changes in cell morphology and in the cell cytoskeleton.  
1075 *J Biol Chem*. 1999;274(50):35944-9. Epub 1999/12/10. doi: 10.1074/jbc.274.50.35944.  
1076 PubMed PMID: 10585482.
- 1077 53. Dormond O, Bezzi M, Mariotti A, Ruegg C. Prostaglandin E2 promotes integrin alpha  
1078 Vbeta 3-dependent endothelial cell adhesion, rac-activation, and spreading through  
1079 cAMP/PKA-dependent signaling. *J Biol Chem*. 2002;277(48):45838-46. Epub  
1080 2002/09/19. doi: 10.1074/jbc.M209213200. PubMed PMID: 12237321.
- 1081 54. Birukova AA, Zagranichnaya T, Fu P, Alekseeva E, Chen W, Jacobson JR, et al.  
1082 Prostaglandins PGE(2) and PGI(2) promote endothelial barrier enhancement via PKA-  
1083 and Epac1/Rap1-dependent Rac activation. *Exp Cell Res*. 2007;313(11):2504-20. Epub  
1084 2007/05/12. doi: 10.1016/j.yexcr.2007.03.036. PubMed PMID: 17493609; PubMed  
1085 Central PMCID: PMCPMC1974901.
- 1086 55. Tallima H, El Ridi R. Arachidonic acid: Physiological roles and potential health benefits -  
1087 A review. *J Adv Res*. 2018;11:33-41. Epub 2018/07/24. doi: 10.1016/j.jare.2017.11.004.  
1088 PubMed PMID: 30034874; PubMed Central PMCID: PMCPMC6052655.
- 1089 56. Brash AR. Arachidonic acid as a bioactive molecule. *J Clin Invest*. 2001;107(11):1339-  
1090 45. Epub 2001/06/08. doi: 10.1172/JCI13210. PubMed PMID: 11390413; PubMed  
1091 Central PMCID: PMCPMC209328.

- 1092 57. Yoshioka T, Inoue H, Kasama T, Seyama Y, Nakashima S, Nozawa Y, et al. Evidence  
1093 that arachidonic acid is deficient in phosphatidylinositol of *Drosophila* heads. *J Biochem.*  
1094 1985;98(3):657-62. Epub 1985/09/01. doi: 10.1093/oxfordjournals.jbchem.a135322.  
1095 PubMed PMID: 3936840.
- 1096 58. Shen LR, Lai CQ, Feng X, Parnell LD, Wan JB, Wang JD, et al. *Drosophila* lacks C20  
1097 and C22 PUFAs. *J Lipid Res.* 2010;51(10):2985-92. Epub 2010/07/27. doi:  
1098 10.1194/jlr.M008524. PubMed PMID: 20656917; PubMed Central PMCID:  
1099 PMCPMC2936753.
- 1100 59. Tan L, Xin X, Zhai L, Shen L. *Drosophila* Fed ARA and EPA Yields Eicosanoids, 15S-  
1101 Hydroxy-5Z,8Z, 11Z, 13E-Eicosatetraenoic Acid, and 15S-Hydroxy-5Z,8Z,11Z,13E,17Z-  
1102 Eicosapentaenoic Acid. *Lipids.* 2016;51(4):435-49. Epub 2016/03/05. doi:  
1103 10.1007/s11745-016-4131-3. PubMed PMID: 26931457.
- 1104 60. Steinhauer J, Gijon MA, Riekhof WR, Voelker DR, Murphy RC, Treisman JE. *Drosophila*  
1105 lysophospholipid acyltransferases are specifically required for germ cell development.  
1106 *Mol Biol Cell.* 2009;20(24):5224-35. Epub 2009/10/30. doi: 10.1091/mbc.E09-05-0382.  
1107 PubMed PMID: 19864461; PubMed Central PMCID: PMCPMC2793297.
- 1108 61. Parisi M, Li R, Oliver B. Lipid profiles of female and male *Drosophila*. *BMC Res Notes.*  
1109 2011;4:198. Epub 2011/06/17. doi: 10.1186/1756-0500-4-198. PubMed PMID:  
1110 21676256; PubMed Central PMCID: PMCPMC3146437.
- 1111 62. Sieber MH, Spradling AC. Steroid Signaling Establishes a Female Metabolic State and  
1112 Regulates SREBP to Control Oocyte Lipid Accumulation. *Curr Biol.* 2015;25(8):993-  
1113 1004. Epub 2015/03/25. doi: 10.1016/j.cub.2015.02.019. PubMed PMID: 25802149;  
1114 PubMed Central PMCID: PMCPMC6894397.
- 1115 63. Carvalho M, Sampaio JL, Palm W, Brankatschk M, Eaton S, Shevchenko A. Effects of  
1116 diet and development on the *Drosophila* lipidome. *Mol Syst Biol.* 2012;8:600. Epub  
1117 2012/08/07. doi: 10.1038/msb.2012.29. PubMed PMID: 22864382; PubMed Central  
1118 PMCID: PMCPMC3421444.
- 1119 64. Miyaura C, Inada M, Matsumoto C, Ohshiba T, Uozumi N, Shimizu T, et al. An essential  
1120 role of cytosolic phospholipase A2alpha in prostaglandin E2-mediated bone resorption  
1121 associated with inflammation. *J Exp Med.* 2003;197(10):1303-10. Epub 2003/05/14. doi:  
1122 10.1084/jem.20030015. PubMed PMID: 12743173; PubMed Central PMCID:  
1123 PMCPMC2193787.
- 1124 65. Barbour SE, Dennis EA. Antisense inhibition of group II phospholipase A2 expression  
1125 blocks the production of prostaglandin E2 by P388D1 cells. *J Biol Chem.*  
1126 1993;268(29):21875-82. Epub 1993/10/15. PubMed PMID: 8408042.
- 1127 66. Ghosh M, Stewart A, Tucker DE, Bonventre JV, Murphy RC, Leslie CC. Role of cytosolic  
1128 phospholipase A(2) in prostaglandin E(2) production by lung fibroblasts. *Am J Respir*  
1129 *Cell Mol Biol.* 2004;30(1):91-100. Epub 2003/07/05. doi: 10.1165/rcmb.2003-0005OC.  
1130 PubMed PMID: 12842849.
- 1131 67. Moreira LS, Piva B, Gentile LB, Mesquita-Santos FP, D'Avila H, Maya-Monteiro CM, et  
1132 al. Cytosolic phospholipase A2-driven PGE2 synthesis within unsaturated fatty acids-  
1133 induced lipid bodies of epithelial cells. *Biochim Biophys Acta.* 2009;1791(3):156-65.  
1134 Epub 2009/04/16. doi: 10.1016/j.bbali.2009.01.003. PubMed PMID: 19367763.
- 1135 68. Yu W, Bozza PT, Tzizik DM, Gray JP, Cassara J, Dvorak AM, et al. Co-  
1136 compartmentalization of MAP kinases and cytosolic phospholipase A2 at cytoplasmic  
1137 arachidonate-rich lipid bodies. *Am J Pathol.* 1998;152(3):759-69. Epub 1998/03/21.  
1138 PubMed PMID: 9502418; PubMed Central PMCID: PMCPMC1858398.
- 1139 69. Accioly MT, Pacheco P, Maya-Monteiro CM, Carrossini N, Robbs BK, Oliveira SS, et al.  
1140 Lipid bodies are reservoirs of cyclooxygenase-2 and sites of prostaglandin-E2 synthesis  
1141 in colon cancer cells. *Cancer Res.* 2008;68(6):1732-40. Epub 2008/03/15. doi:  
1142 10.1158/0008-5472.CAN-07-1999. PubMed PMID: 18339853.

- 1143 70. D'Avila H, Freire-de-Lima CG, Roque NR, Teixeira L, Barja-Fidalgo C, Silva AR, et al.  
1144 Host cell lipid bodies triggered by Trypanosoma cruzi infection and enhanced by the  
1145 uptake of apoptotic cells are associated with prostaglandin E(2) generation and  
1146 increased parasite growth. *J Infect Dis*. 2011;204(6):951-61. Epub 2011/08/19. doi:  
1147 10.1093/infdis/jir432. PubMed PMID: 21849292.
- 1148 71. Hugenothe M, Bohnert M. Come a little bit closer! Lipid droplet-ER contact sites are  
1149 getting crowded. *Biochim Biophys Acta Mol Cell Res*. 2020;1867(2):118603. Epub  
1150 2019/11/17. doi: 10.1016/j.bbamcr.2019.118603. PubMed PMID: 31733263.
- 1151 72. Nguyen TB, Louie SM, Daniele JR, Tran Q, Dillin A, Zoncu R, et al. DGAT1-Dependent  
1152 Lipid Droplet Biogenesis Protects Mitochondrial Function during Starvation-Induced  
1153 Autophagy. *Dev Cell*. 2017;42(1):9-21 e5. Epub 2017/07/12. doi:  
1154 10.1016/j.devcel.2017.06.003. PubMed PMID: 28697336; PubMed Central PMCID:  
1155 PMC5553613.
- 1156 73. Chitraju C, Mejhert N, Haas JT, Diaz-Ramirez LG, Grueter CA, Imbriglio JE, et al.  
1157 Triglyceride Synthesis by DGAT1 Protects Adipocytes from Lipid-Induced ER Stress  
1158 during Lipolysis. *Cell Metab*. 2017;26(2):407-18 e3. Epub 2017/08/03. doi:  
1159 10.1016/j.cmet.2017.07.012. PubMed PMID: 28768178; PubMed Central PMCID:  
1160 PMC6195226.
- 1161 74. Rambold AS, Cohen S, Lippincott-Schwartz J. Fatty acid trafficking in starved cells:  
1162 regulation by lipid droplet lipolysis, autophagy, and mitochondrial fusion dynamics. *Dev*  
1163 *Cell*. 2015;32(6):678-92. Epub 2015/03/11. doi: 10.1016/j.devcel.2015.01.029. PubMed  
1164 PMID: 25752962; PubMed Central PMCID: PMC4375018.
- 1165 75. Haemmerle G, Moustafa T, Woelkart G, Buttner S, Schmidt A, van de Weijer T, et al.  
1166 ATGL-mediated fat catabolism regulates cardiac mitochondrial function via PPAR-alpha  
1167 and PGC-1. *Nat Med*. 2011;17(9):1076-85. Epub 2011/08/23. doi: 10.1038/nm.2439.  
1168 PubMed PMID: 21857651; PubMed Central PMCID: PMC3244833.
- 1169 76. Okuda S, Saito H, Katsuki H. Arachidonic acid: toxic and trophic effects on cultured  
1170 hippocampal neurons. *Neuroscience*. 1994;63(3):691-9. Epub 1994/12/01. doi:  
1171 10.1016/0306-4522(94)90515-0. PubMed PMID: 7898670.
- 1172 77. Zhang N, Wang L, Luo G, Tang X, Ma L, Zheng Y, et al. Arachidonic Acid Regulation of  
1173 Intracellular Signaling Pathways and Target Gene Expression in Bovine Ovarian  
1174 Granulosa Cells. *Animals (Basel)*. 2019;9(6). Epub 2019/06/30. doi:  
1175 10.3390/ani9060374. PubMed PMID: 31248190; PubMed Central PMCID:  
1176 PMC6617051.
- 1177 78. Aguila JR, Suszko J, Gibbs AG, Hoshizaki DK. The role of larval fat cells in adult  
1178 *Drosophila melanogaster*. *J Exp Biol*. 2007;210(Pt 6):956-63. Epub 2007/03/06. doi:  
1179 10.1242/jeb.001586. PubMed PMID: 17337708.
- 1180 79. Liu L, Zhang K, Sandoval H, Yamamoto S, Jaiswal M, Sanz E, et al. Glial lipid droplets  
1181 and ROS induced by mitochondrial defects promote neurodegeneration. *Cell*.  
1182 2015;160(1-2):177-90. Epub 2015/01/17. doi: 10.1016/j.cell.2014.12.019. PubMed  
1183 PMID: 25594180; PubMed Central PMCID: PMC4377295.
- 1184 80. Lubojemska A, Stefana MI, Sorge S, Bailey AP, Lampe L, Yoshimura A, et al. Adipose  
1185 triglyceride lipase protects renal cell endocytosis in a *Drosophila* dietary model of chronic  
1186 kidney disease. *PLoS Biol*. 2021;19(5):e3001230. Epub 2021/05/05. doi:  
1187 10.1371/journal.pbio.3001230. PubMed PMID: 33945525; PubMed Central PMCID:  
1188 PMC8121332.
- 1189 81. Lima IV, Bastos LF, Limborco-Filho M, Fiebich BL, de Oliveira AC. Role of  
1190 prostaglandins in neuroinflammatory and neurodegenerative diseases. *Mediators*  
1191 *Inflamm*. 2012;2012:946813. Epub 2012/07/11. doi: 10.1155/2012/946813. PubMed  
1192 PMID: 22778499; PubMed Central PMCID: PMC3385693.



- 1193 82. Tzeng SF, Hsiao HY, Mak OT. Prostaglandins and cyclooxygenases in glial cells during  
1194 brain inflammation. *Curr Drug Targets Inflamm Allergy*. 2005;4(3):335-40. Epub  
1195 2005/08/17. doi: 10.2174/1568010054022051. PubMed PMID: 16101543.
- 1196 83. Heier C, Knittelfelder O, Hofbauer HF, Mende W, Pornbacher I, Schiller L, et al.  
1197 Hormone-sensitive lipase couples intergenerational sterol metabolism to reproductive  
1198 success. *Elife*. 2021;10. Epub 2021/02/05. doi: 10.7554/eLife.63252. PubMed PMID:  
1199 33538247; PubMed Central PMCID: PMC7880688.
- 1200 84. Spracklen AJ, Kelsch DJ, Chen X, Spracklen CN, Tootle TL. Prostaglandins temporally  
1201 regulate cytoplasmic actin bundle formation during *Drosophila* oogenesis. *Mol Biol Cell*.  
1202 2014;25(3):397-411. Epub 2013/11/29. doi: 10.1091/mbc.E13-07-0366. PubMed PMID:  
1203 24284900; PubMed Central PMCID: PMC3907279.
- 1204 85. Yuan C, Smith WL. A cyclooxygenase-2-dependent prostaglandin E2 biosynthetic  
1205 system in the Golgi apparatus. *J Biol Chem*. 2015;290(9):5606-20. Epub 2014/12/31.  
1206 doi: 10.1074/jbc.M114.632463. PubMed PMID: 25548276; PubMed Central PMCID:  
1207 PMC4342474.
- 1208 86. Fong TH, Wu CH, Liao EW, Chang CY, Pai MH, Chiou RJ, et al. Association of globular  
1209 beta-actin with intracellular lipid droplets in rat adrenocortical cells and adipocytes.  
1210 *Biochem Biophys Res Commun*. 2001;289(5):1168-74. Epub 2001/12/14. doi:  
1211 10.1006/bbrc.2001.6080. PubMed PMID: 11741315.
- 1212 87. Pfisterer SG, Gateva G, Horvath P, Pirhonen J, Salo VT, Karhinen L, et al. Role for  
1213 formin-like 1-dependent acto-myosin assembly in lipid droplet dynamics and lipid  
1214 storage. *Nat Commun*. 2017;8:14858. Epub 2017/04/01. doi: 10.1038/ncomms14858.  
1215 PubMed PMID: 28361956; PubMed Central PMCID: PMC5380971.
- 1216 88. Kilwein MD, Welte MA. Lipid droplet motility and organelle contacts. *Contact (Thousand*  
1217 *Oaks)*. 2019;2. Epub 2020/01/08. doi: 10.1177/2515256419895688. PubMed PMID:  
1218 31909374; PubMed Central PMCID: PMC6943980.
- 1219 89. Bersuker K, Peterson CWH, To M, Sahl SJ, Savikhin V, Grossman EA, et al. A Proximity  
1220 Labeling Strategy Provides Insights into the Composition and Dynamics of Lipid Droplet  
1221 Proteomes. *Dev Cell*. 2018;44(1):97-112 e7. Epub 2017/12/26. doi:  
1222 10.1016/j.devcel.2017.11.020. PubMed PMID: 29275994; PubMed Central PMCID:  
1223 PMC5764092.
- 1224 90. Welte MA, Cermelli S, Griner J, Viera A, Guo Y, Kim DH, et al. Regulation of lipid-droplet  
1225 transport by the perilipin homolog LSD2. *Curr Biol*. 2005;15(14):1266-75. Epub  
1226 2005/07/30. doi: 10.1016/j.cub.2005.06.062. PubMed PMID: 16051169.
- 1227 91. Herms A, Bosch M, Reddy BJ, Schieber NL, Fajardo A, Ruperez C, et al. AMPK  
1228 activation promotes lipid droplet dispersion on deetyrosinated microtubules to increase  
1229 mitochondrial fatty acid oxidation. *Nat Commun*. 2015;6:7176. Epub 2015/05/28. doi:  
1230 10.1038/ncomms8176. PubMed PMID: 26013497; PubMed Central PMCID:  
1231 PMC4446796.
- 1232 92. Ying F, Cai Y, Cai Y, Wang Y, Tang EHC. Prostaglandin E receptor subtype 4 regulates  
1233 lipid droplet size and mitochondrial activity in murine subcutaneous white adipose tissue.  
1234 *FASEB J*. 2017;31(9):4023-36. Epub 2017/05/24. doi: 10.1096/fj.201700191R. PubMed  
1235 PMID: 28533326.
- 1236 93. Seachord CL, VandeVoort CA, Duffy DM. Adipose differentiation-related protein: a  
1237 gonadotropin- and prostaglandin-regulated protein in primate periovulatory follicles. *Biol*  
1238 *Reprod*. 2005;72(6):1305-14. Epub 2005/02/04. doi: 10.1095/biolreprod.104.037523.  
1239 PubMed PMID: 15689536.
- 1240 94. de Souza G, Silva RJ, Milian ICB, Rosini AM, de Araujo TE, Teixeira SC, et al.  
1241 Cyclooxygenase (COX)-2 modulates *Toxoplasma gondii* infection, immune response  
1242 and lipid droplets formation in human trophoblast cells and villous explants. *Sci Rep*.

- 1243 2021;11(1):12709. Epub 2021/06/18. doi: 10.1038/s41598-021-92120-3. PubMed PMID:  
1244 34135407; PubMed Central PMCID: PMCPMC8209052.
- 1245 95. Dutta A, Kumar Sinha D. Turnover of the actomyosin complex in zebrafish embryos  
1246 directs geometric remodelling and the recruitment of lipid droplets. *Sci Rep*.  
1247 2015;5:13915. Epub 2015/09/12. doi: 10.1038/srep13915. PubMed PMID: 26355567;  
1248 PubMed Central PMCID: PMCPMC4650301.
- 1249 96. Gupta P, Martin R, Knolker HJ, Nihalani D, Kumar Sinha D. Myosin-1 inhibition by PCIP  
1250 affects membrane shape, cortical actin distribution and lipid droplet dynamics in early  
1251 Zebrafish embryos. *PLoS One*. 2017;12(7):e0180301. Epub 2017/07/06. doi:  
1252 10.1371/journal.pone.0180301. PubMed PMID: 28678859; PubMed Central PMCID:  
1253 PMCPMC5498032.
- 1254 97. Veerabagu M, L KP, Rinne PL, van der Schoot C. Plant Lipid Bodies Traffic on Actin to  
1255 Plasmodesmata Motorized by Myosin XIs. *Int J Mol Sci*. 2020;21(4). Epub 2020/02/26.  
1256 doi: 10.3390/ijms21041422. PubMed PMID: 32093159; PubMed Central PMCID:  
1257 PMCPMC7073070.
- 1258 98. Spracklen AJ, Lamb MC, Groen CM, Tootle TL. Pharmaco-Genetic Screen To Uncover  
1259 Actin Regulators Targeted by Prostaglandins During Drosophila Oogenesis. *G3*  
1260 (Bethesda). 2019;9(11):3555-65. Epub 2019/09/12. doi: 10.1534/g3.119.400704.  
1261 PubMed PMID: 31506320; PubMed Central PMCID: PMCPMC6829128.
- 1262 99. Gaspar I, Szabad J. In vivo analysis of MT-based vesicle transport by confocal reflection  
1263 microscopy. *Cell Motil Cytoskeleton*. 2009;66(2):68-79. Epub 2009/01/09. doi:  
1264 10.1002/cm.20334. PubMed PMID: 19130480.
- 1265 100. Shubeita GT, Tran SL, Xu J, Vershinin M, Cermelli S, Cotton SL, et al. Consequences of  
1266 motor copy number on the intracellular transport of kinesin-1-driven lipid droplets. *Cell*.  
1267 2008;135(6):1098-107. Epub 2008/12/17. doi: 10.1016/j.cell.2008.10.021. PubMed  
1268 PMID: 19070579; PubMed Central PMCID: PMCPMC2768369.
- 1269 101. Gross SP, Welte MA, Block SM, Wieschaus EF. Dynein-mediated cargo transport in  
1270 vivo. A switch controls travel distance. *J Cell Biol*. 2000;148(5):945-56. Epub  
1271 2000/03/08. doi: 10.1083/jcb.148.5.945. PubMed PMID: 10704445; PubMed Central  
1272 PMCID: PMCPMC2174539.
- 1273 102. Sieber MH, Spradling AC. The role of metabolic states in development and disease. *Curr*  
1274 *Opin Genet Dev*. 2017;45:58-68. Epub 2017/03/30. doi: 10.1016/j.gde.2017.03.002.  
1275 PubMed PMID: 28347941; PubMed Central PMCID: PMCPMC6894399.
- 1276 103. Hashemi HF, Goodman JM. The life cycle of lipid droplets. *Curr Opin Cell Biol*.  
1277 2015;33:119-24. doi: 10.1016/j.ceb.2015.02.002. PubMed PMID: 25703629; PubMed  
1278 Central PMCID: PMCPMC4380764.
- 1279 104. Chan AP, Kloc M, Larabell CA, LeGros M, Etkin LD. The maternally localized RNA fatvg  
1280 is required for cortical rotation and germ cell formation. *Mech Dev*. 2007;124(5):350-63.  
1281 Epub 2007/03/23. doi: 10.1016/j.mod.2007.02.001. PubMed PMID: 17376659; PubMed  
1282 Central PMCID: PMCPMC2435194.
- 1283 105. Robker RL. Evidence that obesity alters the quality of oocytes and embryos.  
1284 *Pathophysiology*. 2008;15(2):115-21. Epub 2008/07/05. doi:  
1285 10.1016/j.pathophys.2008.04.004. PubMed PMID: 18599275.
- 1286 106. Wattanakumtornkul S, Damario MA, Stevens Hall SA, Thornhill AR, Tummon IS. Body  
1287 mass index and uterine receptivity in the oocyte donation model. *Fertil Steril*.  
1288 2003;80(2):336-40. Epub 2003/08/12. doi: 10.1016/s0015-0282(03)00595-8. PubMed  
1289 PMID: 12909496.
- 1290 107. Styne-Gross A, Elkind-Hirsch K, Scott RT, Jr. Obesity does not impact implantation rates  
1291 or pregnancy outcome in women attempting conception through oocyte donation. *Fertil*  
1292 *Steril*. 2005;83(6):1629-34. Epub 2005/06/14. doi: 10.1016/j.fertnstert.2005.01.099.  
1293 PubMed PMID: 15950629.

- 1294 108. Lim H, Paria BC, Das SK, Dinchuk JE, Langenbach R, Trzaskos JM, et al. Multiple  
1295 female reproductive failures in cyclooxygenase 2-deficient mice. *Cell*. 1997;91(2):197-  
1296 208. Epub 1997/11/05. doi: 10.1016/s0092-8674(00)80402-x. PubMed PMID: 9346237.
- 1297 109. Wang H, Ma WG, Tejada L, Zhang H, Morrow JD, Das SK, et al. Rescue of female  
1298 infertility from the loss of cyclooxygenase-2 by compensatory up-regulation of  
1299 cyclooxygenase-1 is a function of genetic makeup. *J Biol Chem*. 2004;279(11):10649-  
1300 58. Epub 2004/01/01. doi: 10.1074/jbc.M312203200. PubMed PMID: 14701858.
- 1301 110. Takahashi T, Morrow JD, Wang H, Dey SK. Cyclooxygenase-2-derived prostaglandin  
1302 E(2) directs oocyte maturation by differentially influencing multiple signaling pathways. *J*  
1303 *Biol Chem*. 2006;281(48):37117-29. Epub 2006/10/07. doi: 10.1074/jbc.M608202200.  
1304 PubMed PMID: 17023426.
- 1305 111. Takahashi T, Igarashi H, Amita M, Hara S, Kurachi H. Roles of Prostaglandins During  
1306 Oocyte Maturation: Lessons from Knockout Mice. *Journal of Mammalian Ova Research*.  
1307 2010;27(1):11-20. doi: 10.1274/jmor.27.11.
- 1308 112. Pall M, Friden BE, Brannstrom M. Induction of delayed follicular rupture in the human by  
1309 the selective COX-2 inhibitor rofecoxib: a randomized double-blind study. *Hum Reprod*.  
1310 2001;16(7):1323-8. Epub 2001/06/27. doi: 10.1093/humrep/16.7.1323. PubMed PMID:  
1311 11425807.
- 1312 113. Akil M, Amos RS, Stewart P. Infertility may sometimes be associated with NSAID  
1313 consumption. *Br J Rheumatol*. 1996;35(1):76-8. Epub 1996/01/01. doi:  
1314 10.1093/rheumatology/35.1.76. PubMed PMID: 8624628.
- 1315 114. Smith G, Roberts R, Hall C, Nuki G. Reversible ovulatory failure associated with the  
1316 development of luteinized unruptured follicles in women with inflammatory arthritis taking  
1317 non-steroidal anti-inflammatory drugs. *Br J Rheumatol*. 1996;35(5):458-62. Epub  
1318 1996/05/01. doi: 10.1093/rheumatology/35.5.458. PubMed PMID: 8646437.
- 1319 115. Arend A, Masso R, Masso M, Selstam G. Electron microscope immunocytochemical  
1320 localization of cyclooxygenase-1 and -2 in pseudopregnant rat corpus luteum during  
1321 luteolysis. *Prostaglandins Other Lipid Mediat*. 2004;74(1-4):1-10. Epub 2004/11/25. doi:  
1322 10.1016/j.prostaglandins.2004.05.002. PubMed PMID: 15560112.
- 1323 116. Meadows JW, Eis AL, Brockman DE, Myatt L. Expression and localization of  
1324 prostaglandin E synthase isoforms in human fetal membranes in term and preterm labor.  
1325 *J Clin Endocrinol Metab*. 2003;88(1):433-9. Epub 2003/01/10. doi: 10.1210/jc.2002-  
1326 021061. PubMed PMID: 12519887.
- 1327 117. Meadows JW, Pitzer B, Brockman DE, Myatt L. Expression and localization of  
1328 adipophilin and perilipin in human fetal membranes: association with lipid bodies and  
1329 enzymes involved in prostaglandin synthesis. *J Clin Endocrinol Metab*. 2005;90(4):2344-  
1330 50. Epub 2005/01/20. doi: 10.1210/jc.2004-1199. PubMed PMID: 15657374.
- 1331 118. Namgoong S, Kim NH. Roles of actin binding proteins in mammalian oocyte maturation  
1332 and beyond. *Cell Cycle*. 2016;15(14):1830-43. Epub 2016/05/07. doi:  
1333 10.1080/15384101.2016.1181239. PubMed PMID: 27152960; PubMed Central PMCID:  
1334 PMCPMC4968894.
- 1335 119. Coticchio G, Dal Canto M, Mignini Renzini M, Guglielmo MC, Brambillasca F, Turchi D,  
1336 et al. Oocyte maturation: gamete-somatic cells interactions, meiotic resumption,  
1337 cytoskeletal dynamics and cytoplasmic reorganization. *Hum Reprod Update*.  
1338 2015;21(4):427-54. Epub 2015/03/07. doi: 10.1093/humupd/dmv011. PubMed PMID:  
1339 25744083.
- 1340 120. Thibault ST, Singer MA, Miyazaki WY, Milash B, Dompe NA, Singh CM, et al. A  
1341 complementary transposon tool kit for *Drosophila melanogaster* using P and piggyBac.  
1342 *Nat Genet*. 2004;36(3):283-7. Epub 2004/02/26. doi: 10.1038/ng1314. PubMed PMID:  
1343 14981521.

- 1344 121. LaJeunesse DR, Buckner SM, Lake J, Na C, Pirt A, Fromson K. Three new *Drosophila*  
1345 markers of intracellular membranes. *Biotechniques*. 2004;36(5):784-8, 90. Epub  
1346 2004/05/22. doi: 10.2144/04365ST01. PubMed PMID: 15152597.
- 1347 122. Riedel F, Gillingham AK, Rosa-Ferreira C, Galindo A, Munro S. An antibody toolkit for  
1348 the study of membrane traffic in *Drosophila melanogaster*. *Biol Open*. 2016;5(7):987-92.  
1349 Epub 2016/06/04. doi: 10.1242/bio.018937. PubMed PMID: 27256406; PubMed Central  
1350 PMCID: PMCPMC4958275.
- 1351 123. Platt JL, Michael AF. Retardation of fading and enhancement of intensity of  
1352 immunofluorescence by p-phenylenediamine. *The journal of histochemistry and*  
1353 *cytochemistry : official journal of the Histochemistry Society*. 1983;31(6):840-2. Epub  
1354 1983/06/01. doi: 10.1177/31.6.6341464. PubMed PMID: 6341464.
- 1355 124. Abramoff M, Magalhaes P, Ram S. Image processing with ImageJ. *Biophotonics Int*.  
1356 2004;11(7):36-42.
- 1357 125. Tran SL, Welte MA. In-vivo centrifugation of *Drosophila* embryos. *J Vis Exp*. 2010;(40).  
1358 Epub 2010/07/09. doi: 10.3791/2005. PubMed PMID: 20613707; PubMed Central  
1359 PMCID: PMCPMC3153895.
- 1360 126. Knittelfelder OL, Kohlwein SD. Thin-Layer Chromatography to Separate Phospholipids  
1361 and Neutral Lipids from Yeast. *Cold Spring Harb Protoc*. 2017;2017(5). Epub  
1362 2017/05/04. doi: 10.1101/pdb.prot085456. PubMed PMID: 28461652.
- 1363

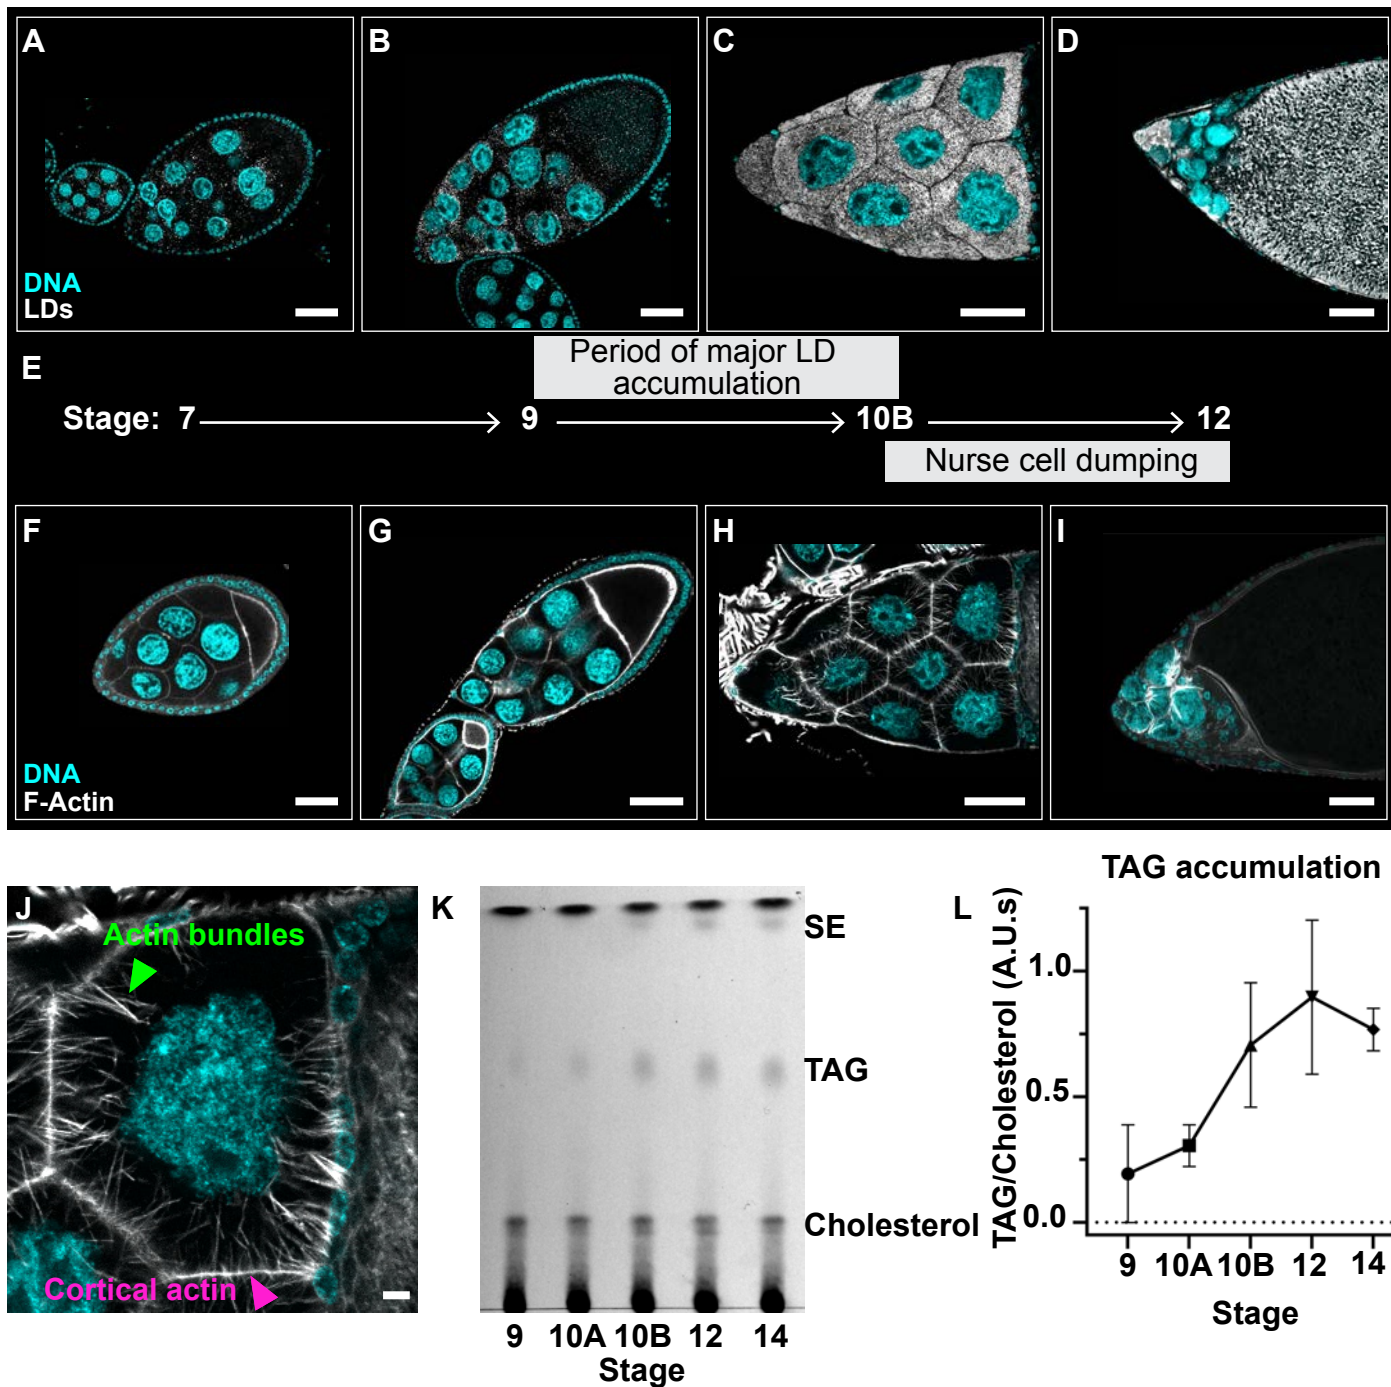

Fig 1

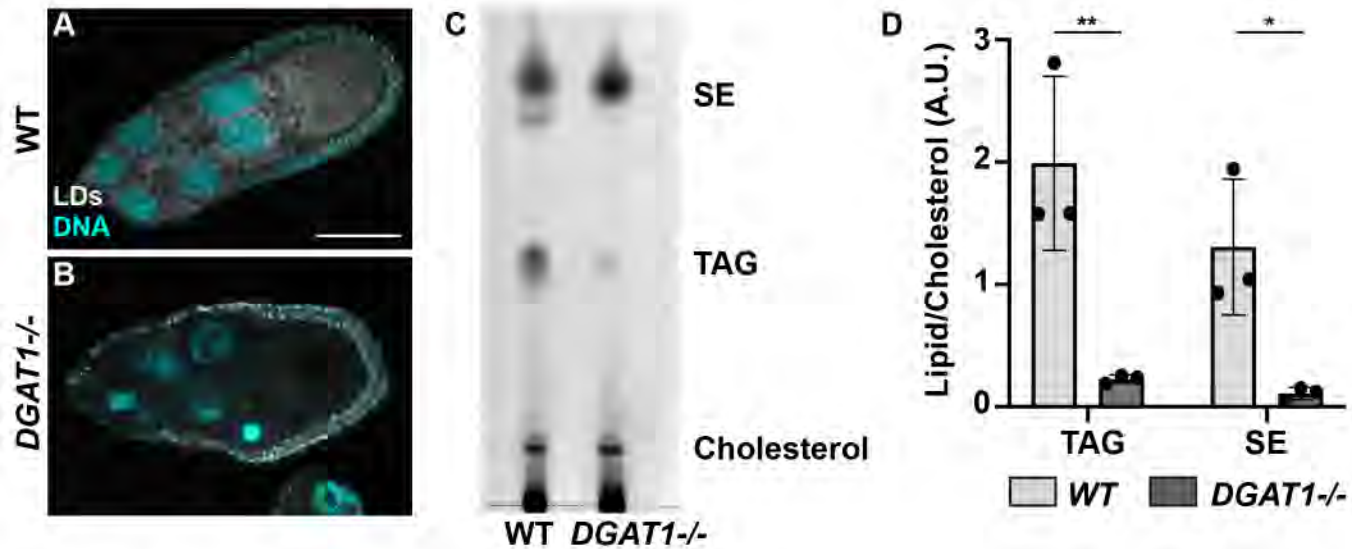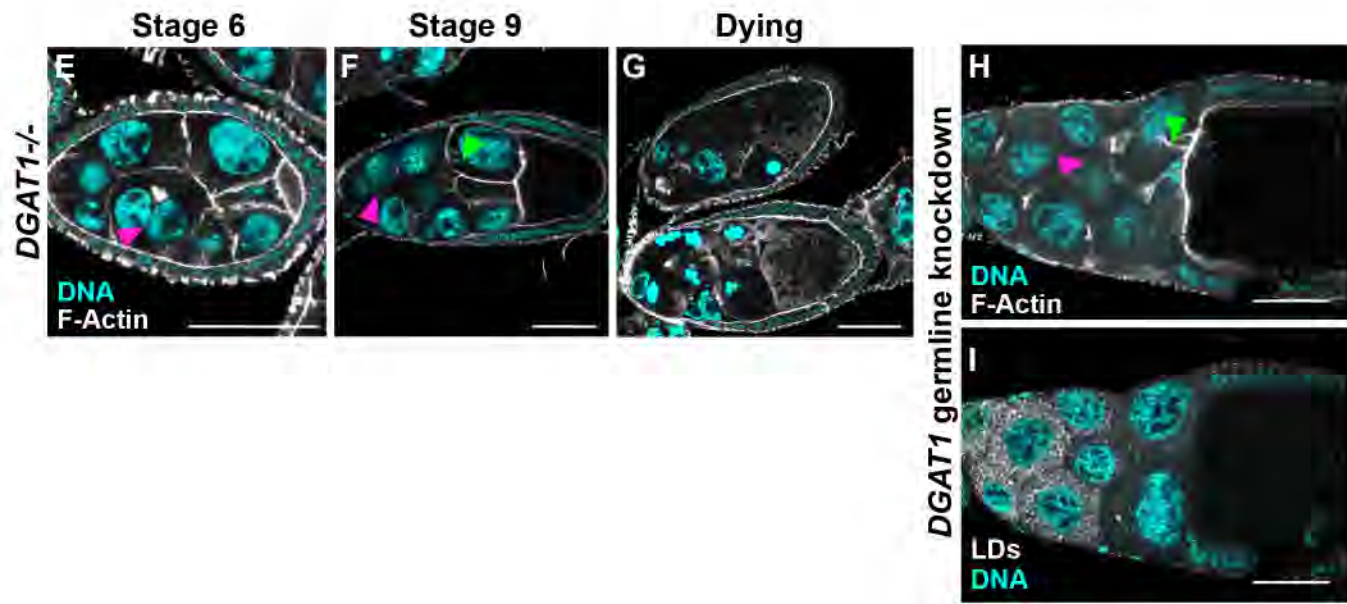

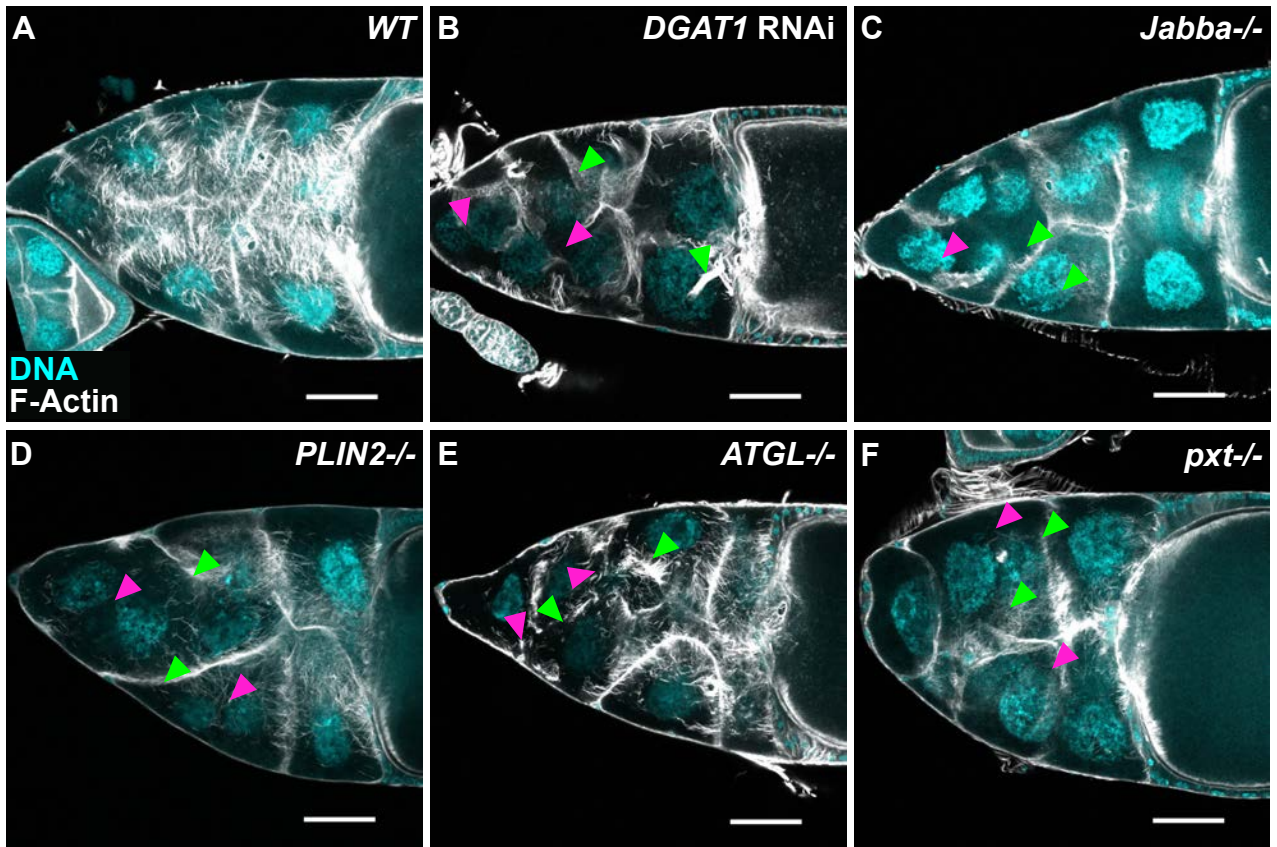

Fig 3

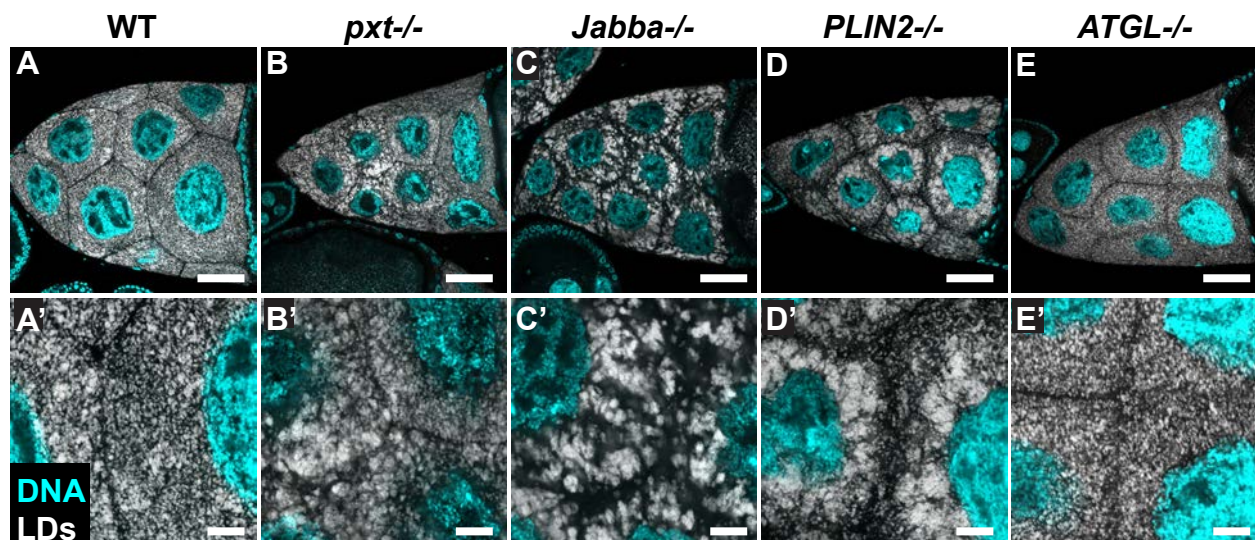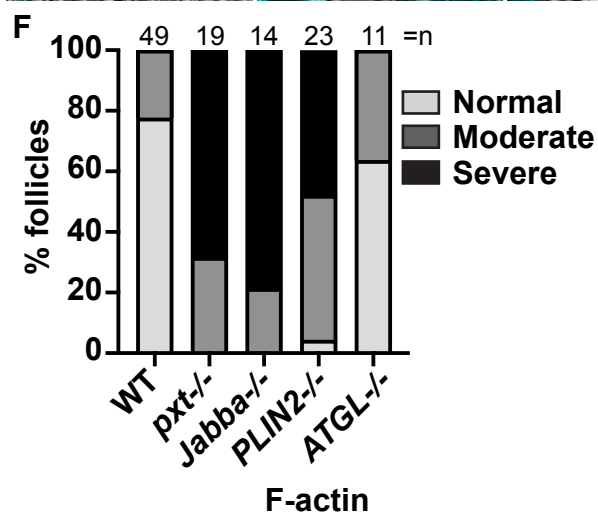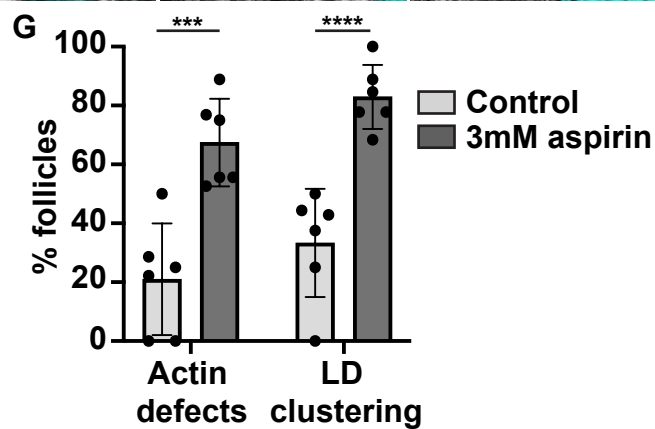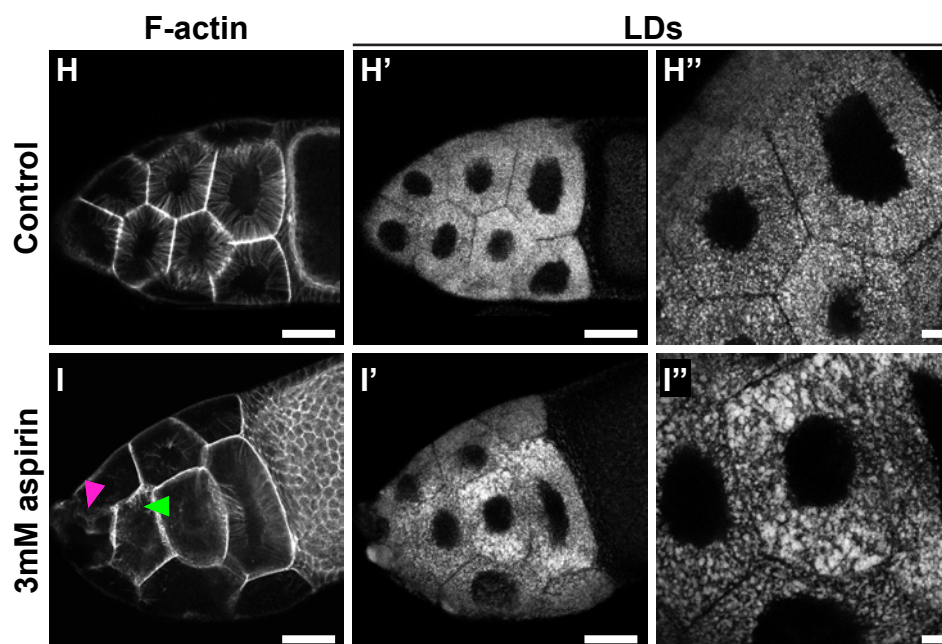

Fig 4



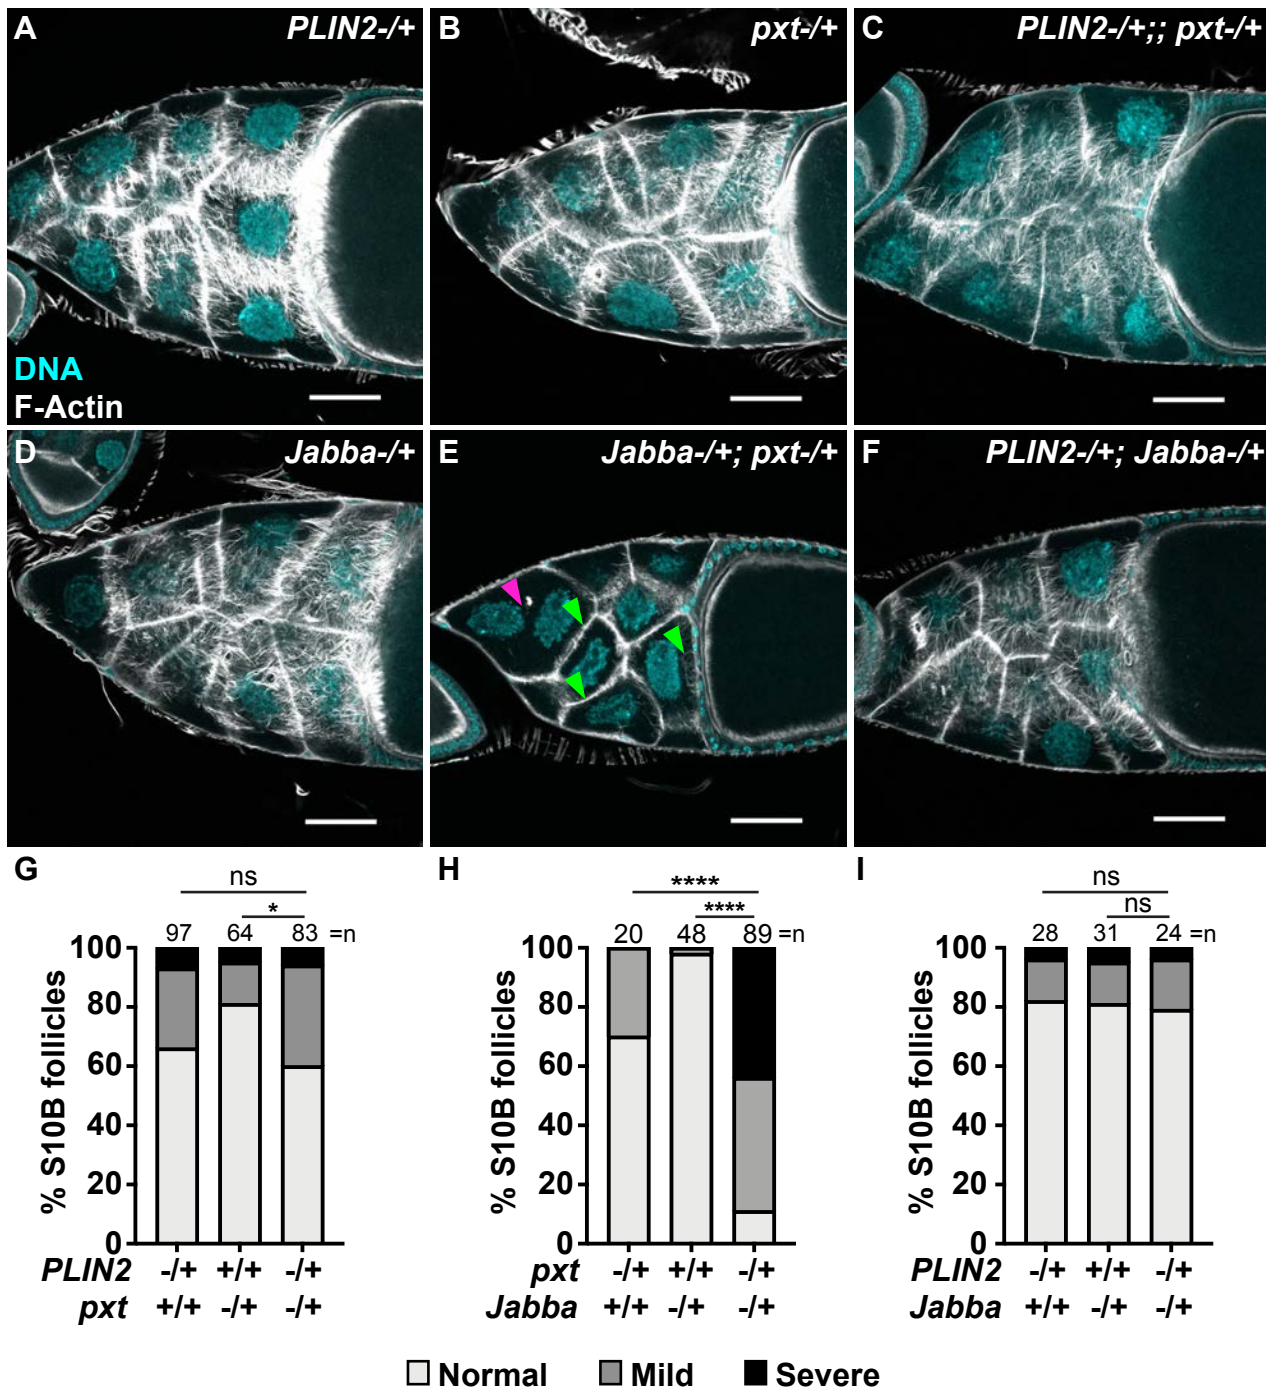

Fig 5

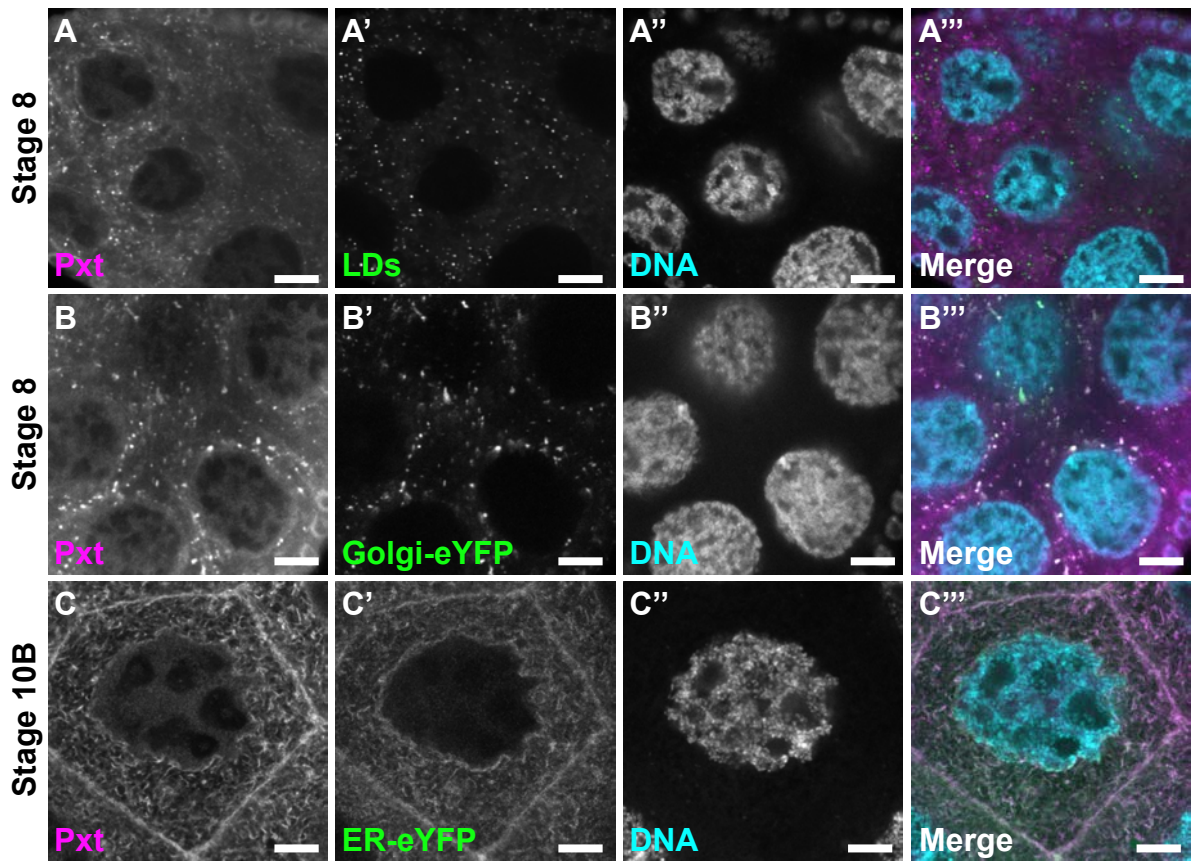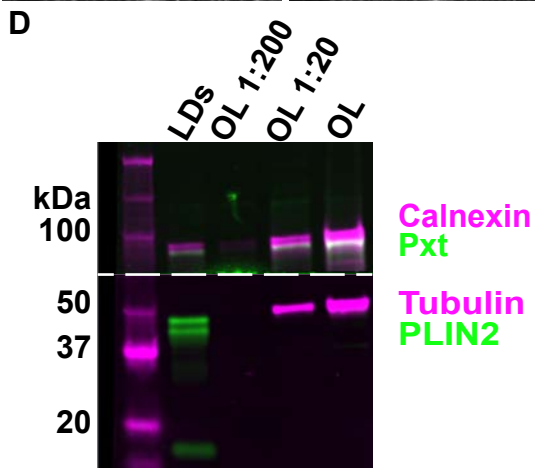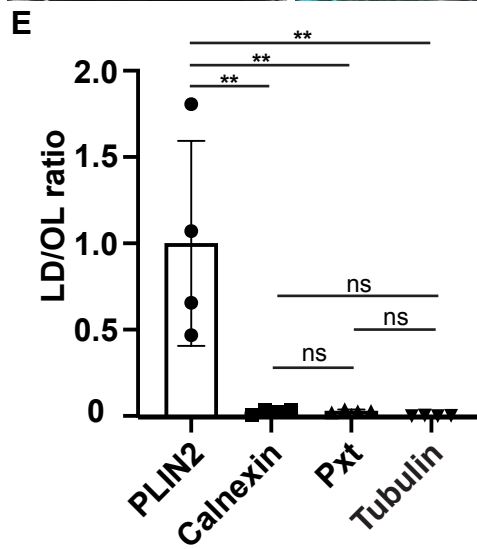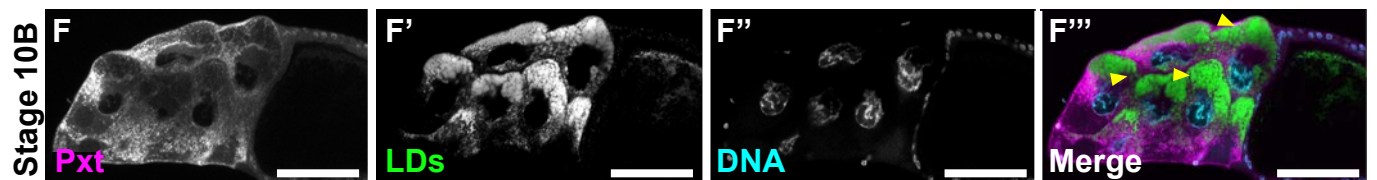

Fig 6

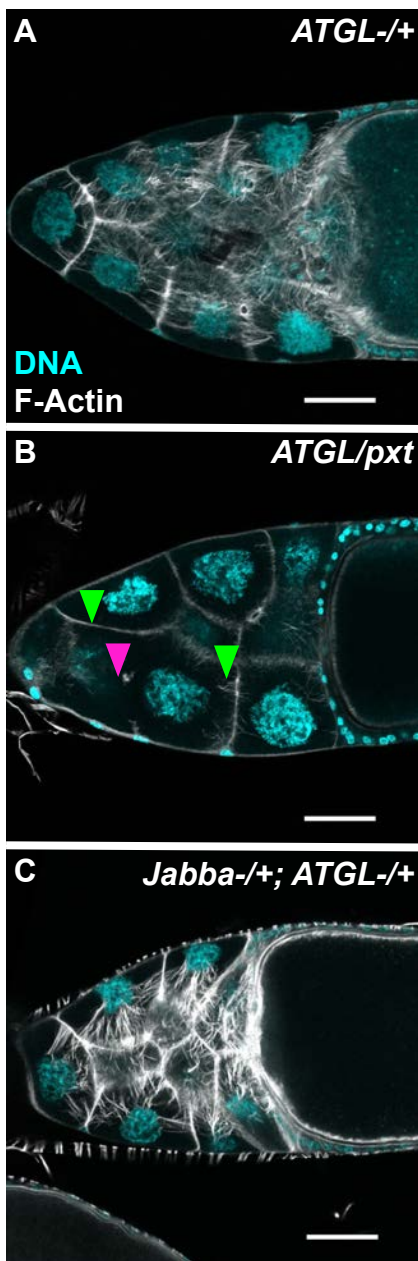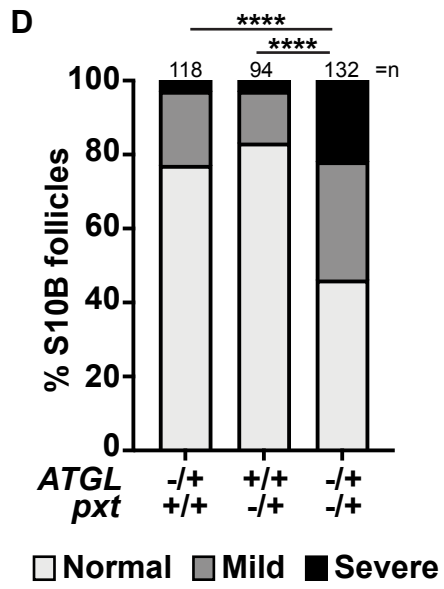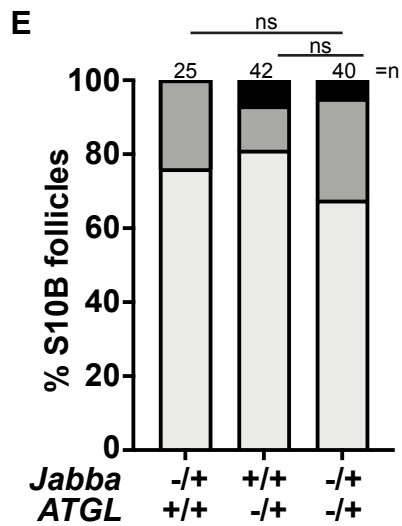

Fig 7

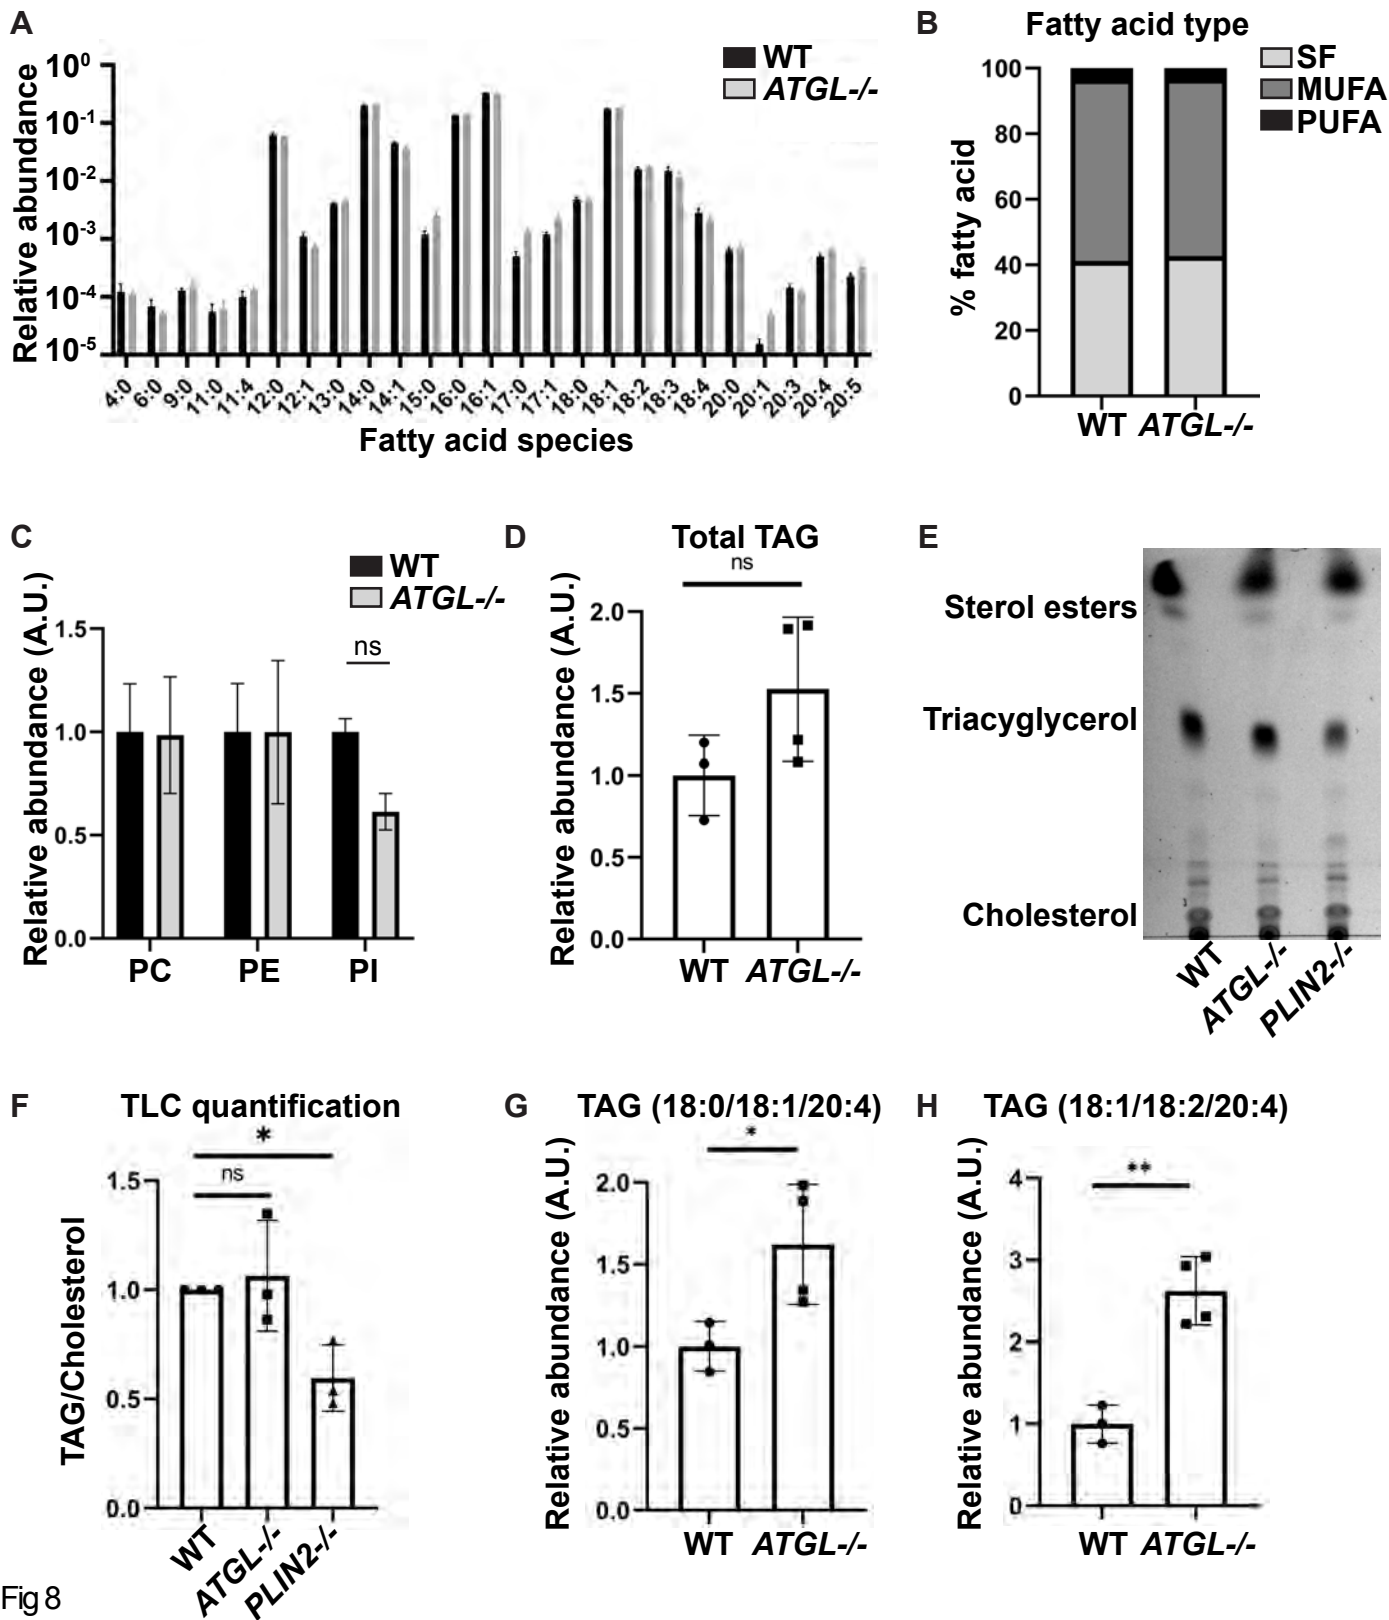

Fig 8

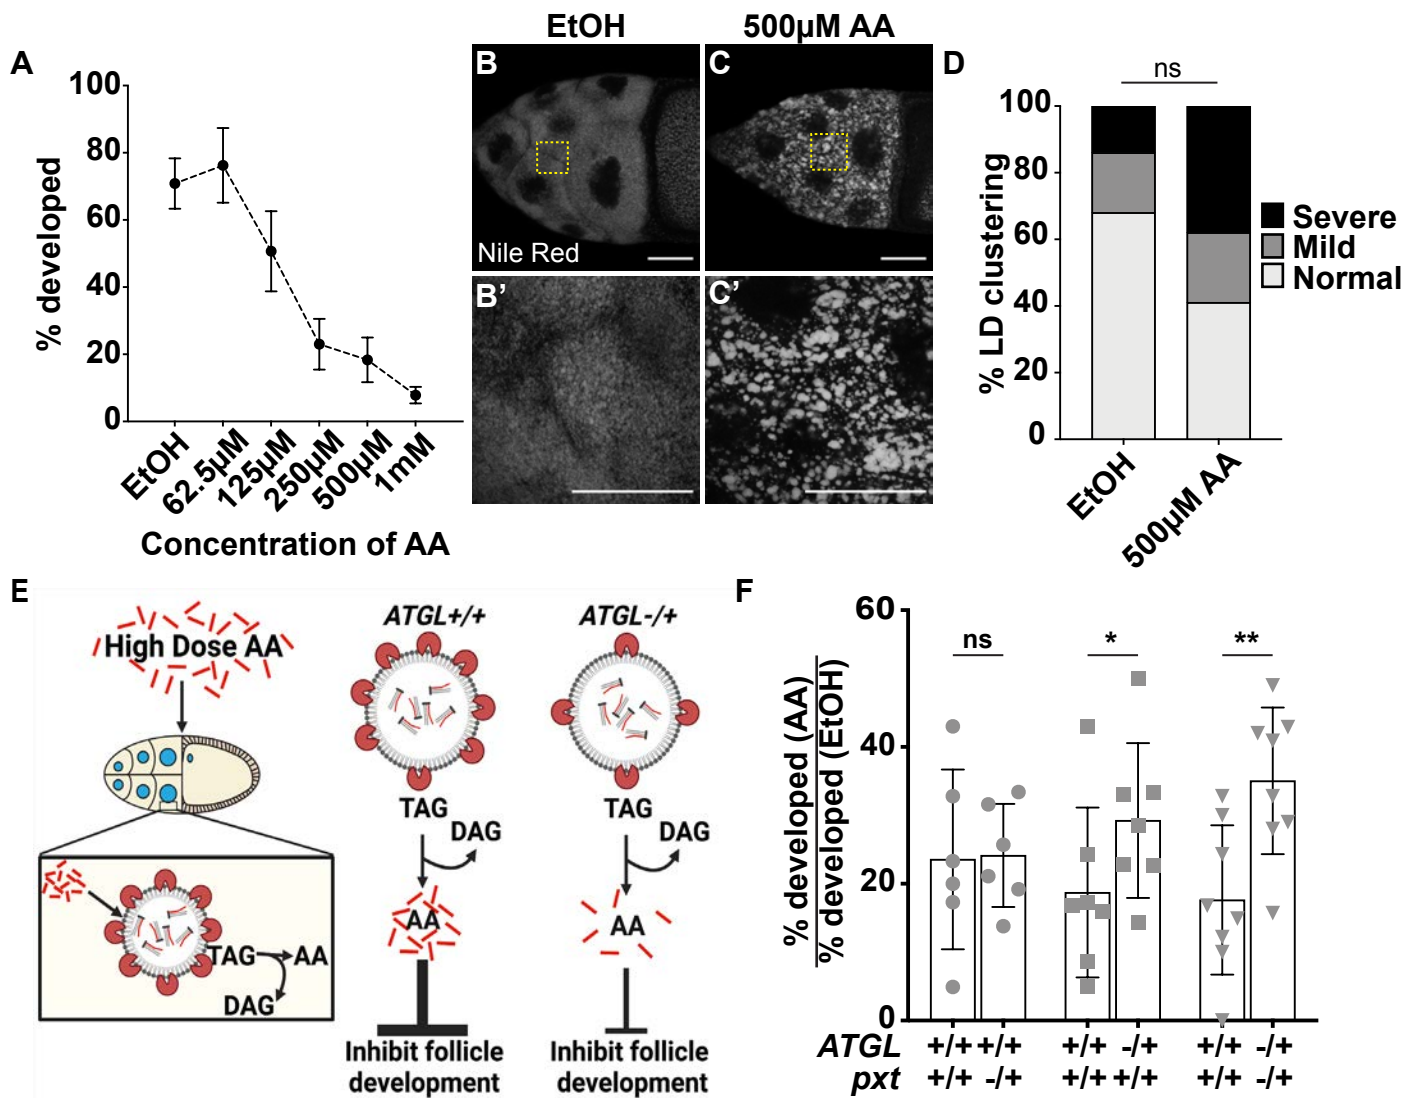

Fig 9

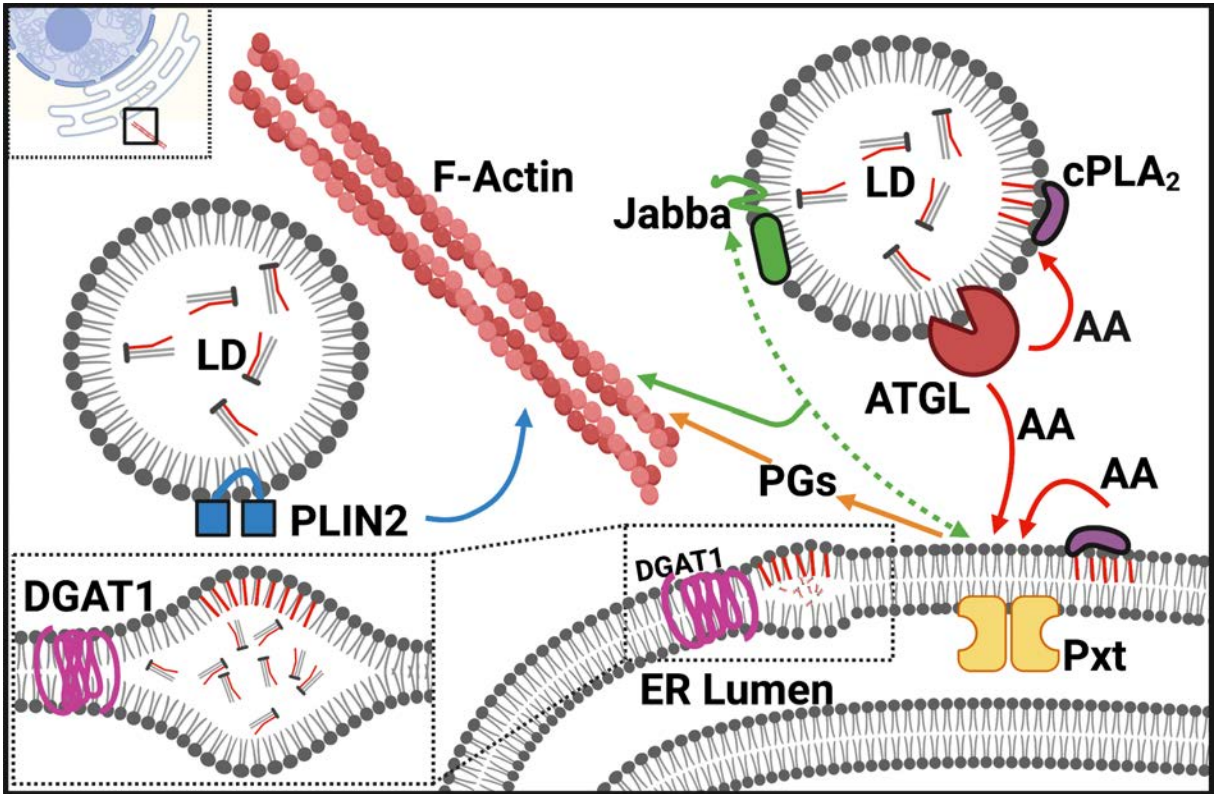

Fig 10

|         |          | Actin Bundles                                                                                                                                                                                                           | Cortical Actin                                                                                                                                                                                                     |
|---------|----------|-------------------------------------------------------------------------------------------------------------------------------------------------------------------------------------------------------------------------|--------------------------------------------------------------------------------------------------------------------------------------------------------------------------------------------------------------------|
| Normal  |          | 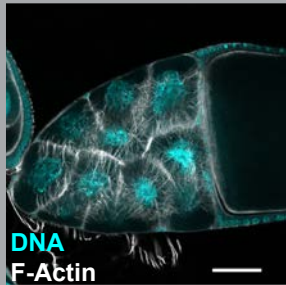 <p>Bundles form around nurse cell periphery</p> <p>Bundles are straight and oriented inward</p>                                       |  <p>Actin surrounds each nurse cell, separating nurse cell nuclei</p>                                                            |
|         | Mild     |  <p>Actin bundles are largely normal, but may be sparse, or missing from areas</p>                                                     |  <p>Nurse cell nuclei are in close proximity/ touching</p> <p>A single instance of disrupted cortical actin is observed</p>      |
| Defects | Moderate |  <p>Actin bundles are sparse, stunted, and/or clumped</p> <p>Actin bundles are missing from areas around the nurse cell periphery</p> |  <p>Two instances of disrupted cortical actin are observed</p> <p>Nurse cell nuclei are in close proximity/ touching</p>        |
|         | Severe   |  <p>Actin bundle formation is delayed, bundles fail to form, and are sparse and/or stunted and/or missing</p>                        |  <p>Three or more instances of cortical actin breakdown are seen</p> <p>Nurse cell nuclei are in close proximity/ touching</p> |

SFig 1

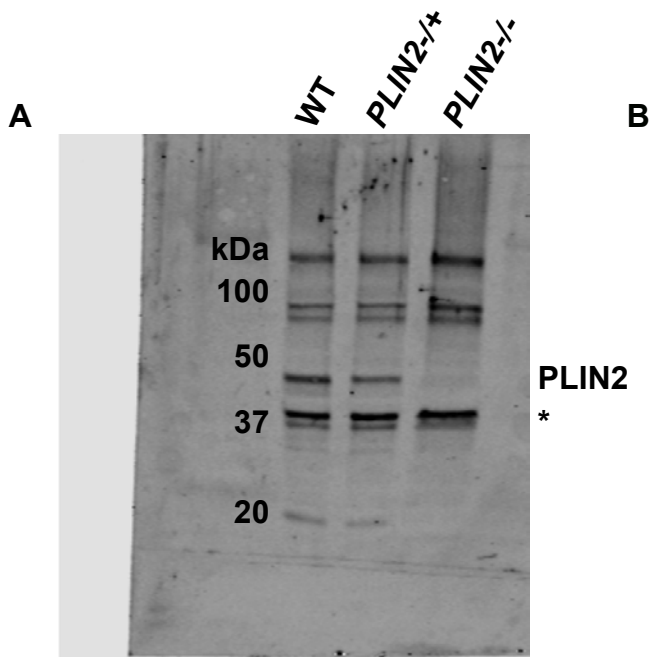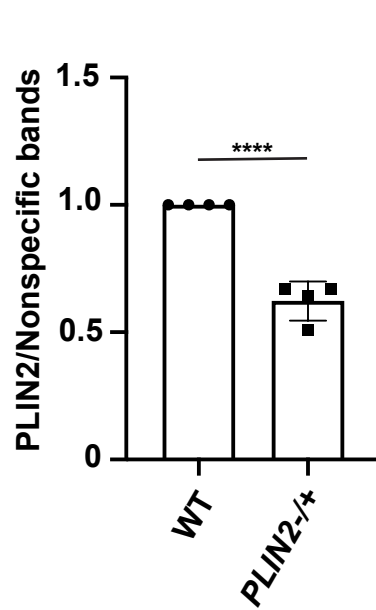

SFig 2



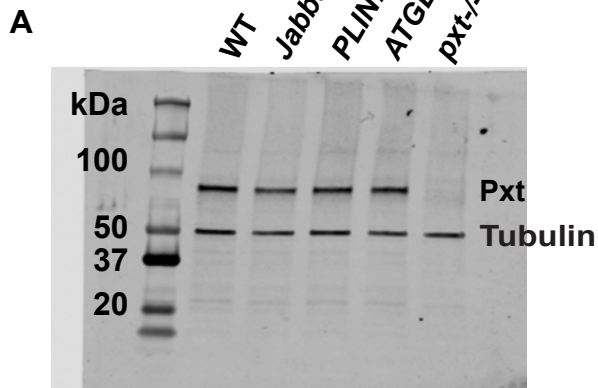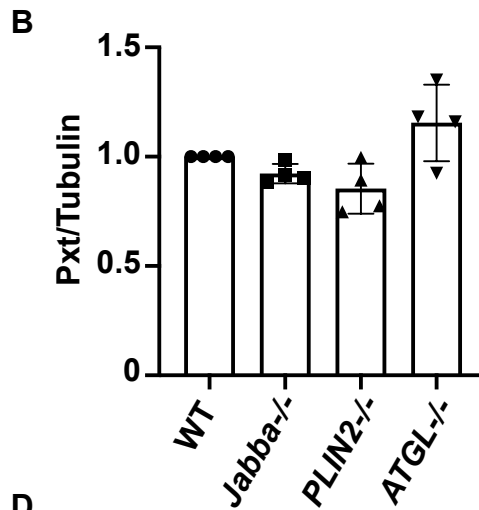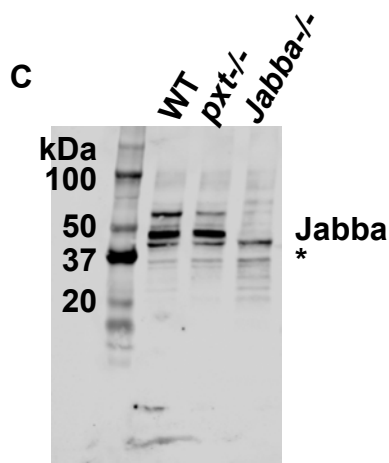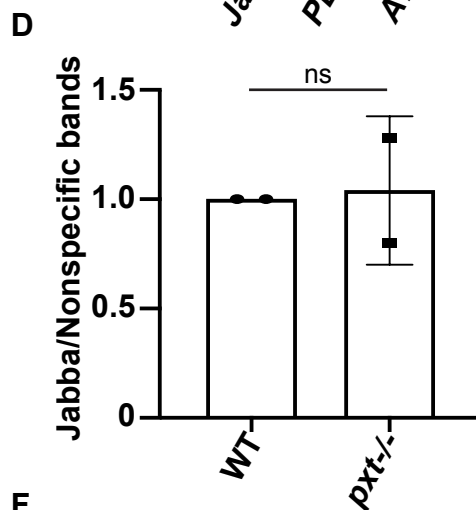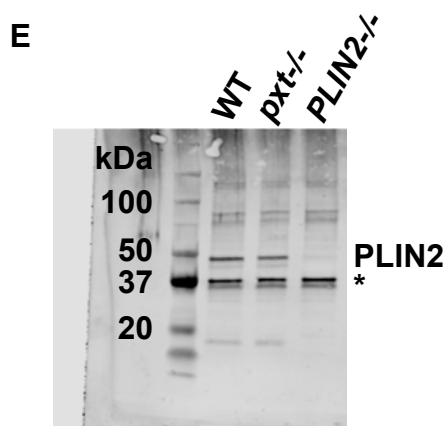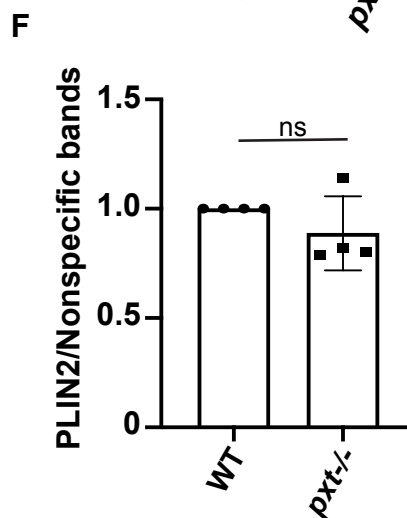

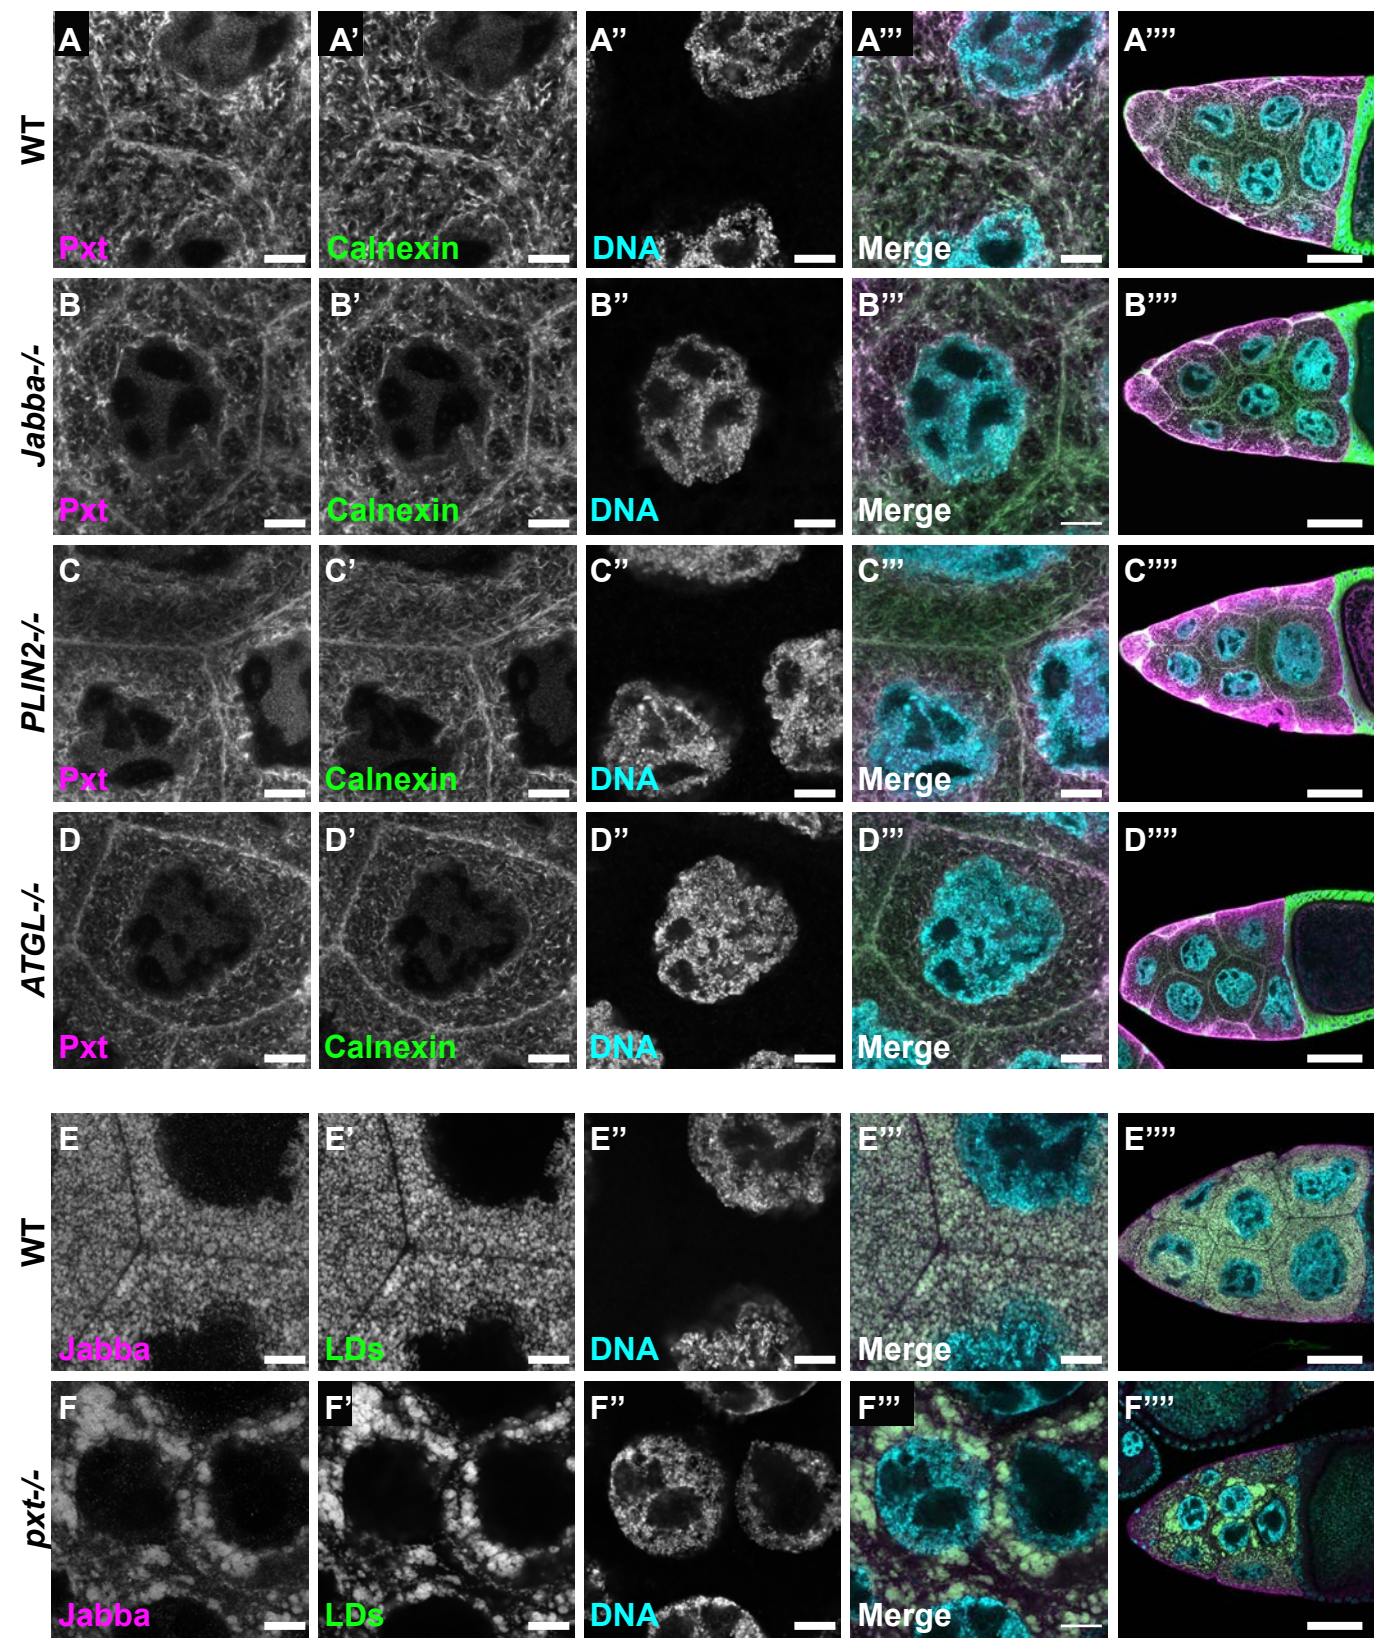

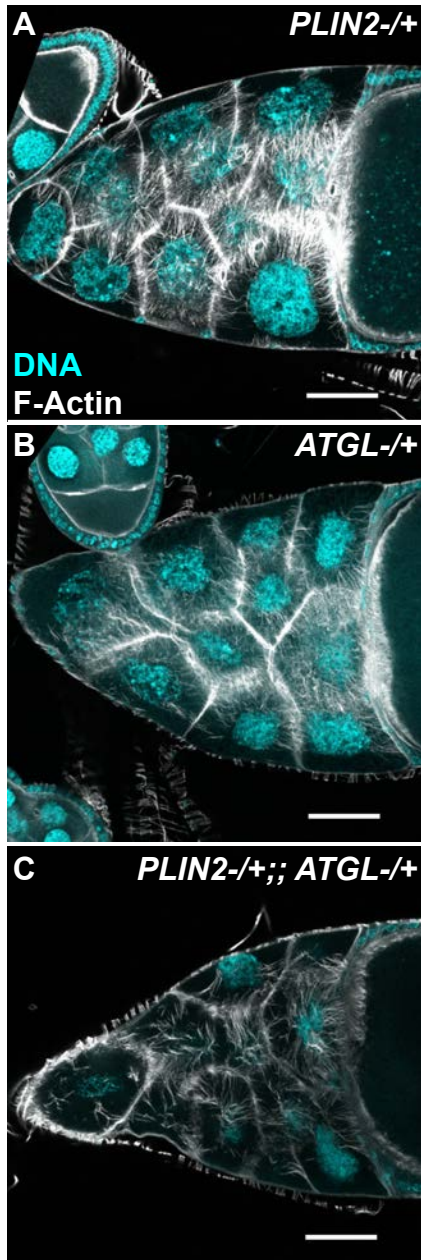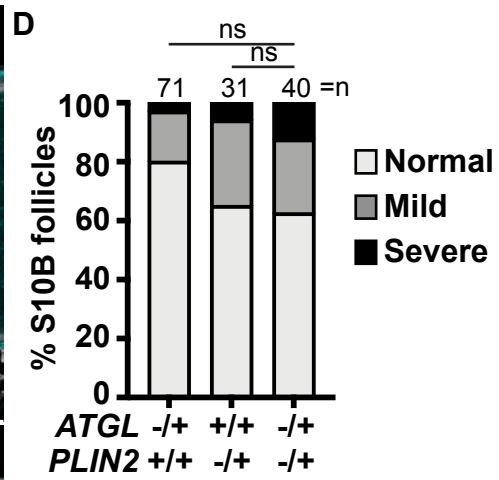

**A** TAG (18:0/18:1/20:4)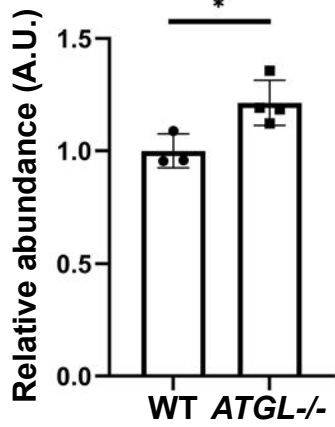**B** TAG (18:1/18:2/20:4)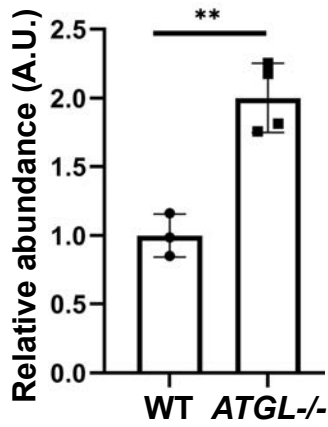**C** Total TAG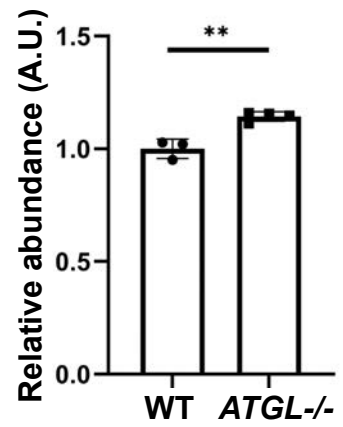**D**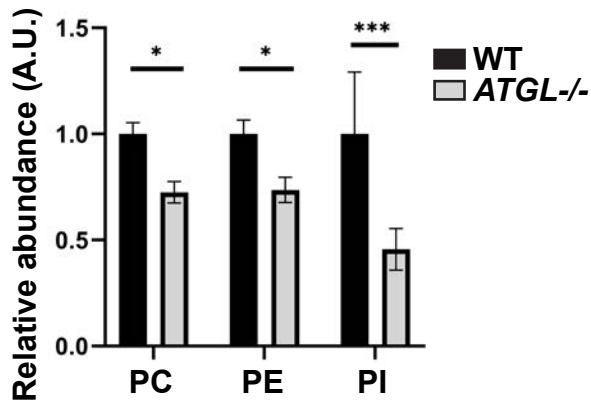

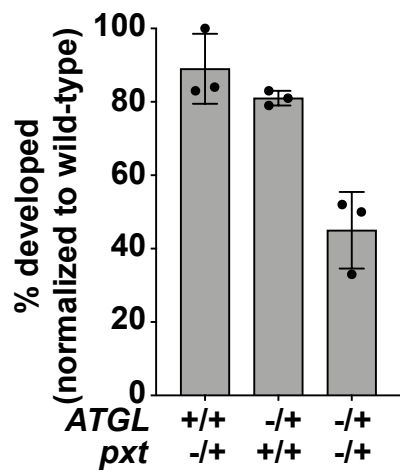

SFig 7

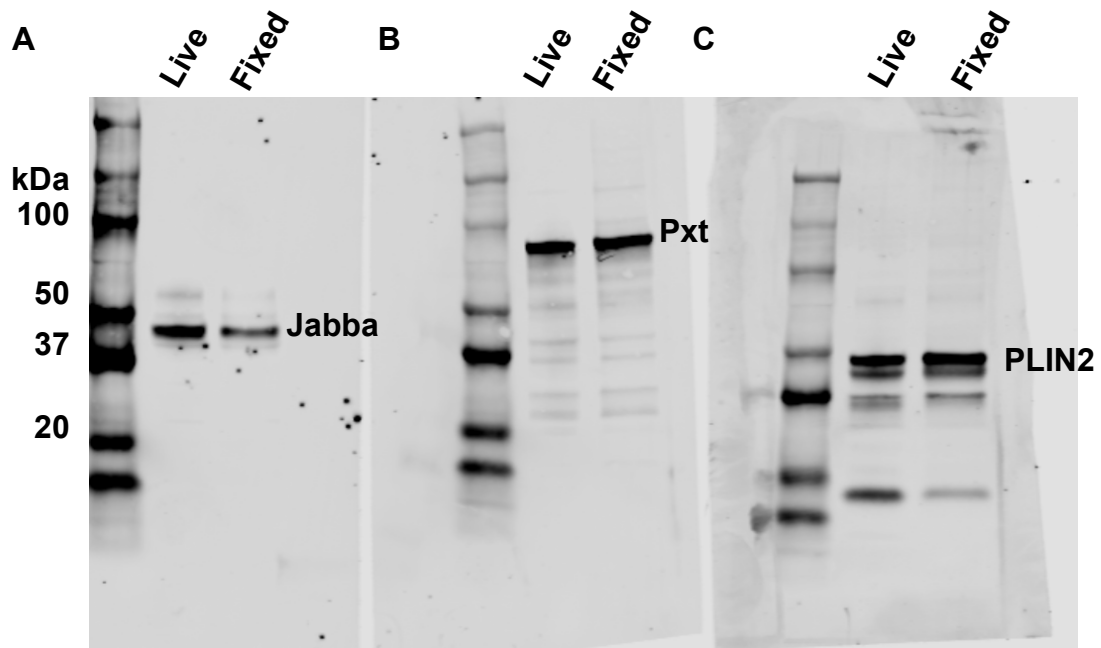

SFig 8

| Triglyceride species | wild type 2 | wild type 3 | wild type 4 | ATGL 1     | ATGL 2     | ATGL 3     | ATGL 4     |
|----------------------|-------------|-------------|-------------|------------|------------|------------|------------|
| 16:1/17:1/18:2       | 4028800     | 5894800     | 5037800     | 9625800    | 8910800    | 17357800   | 11937800   |
| 16:1/17:1/18:1       | 12114670    | 30224670    | 23104670    | 33724670   | 52254670   | 81364670   | 76874670   |
| 16:0/17:0/18:1       | 9373400     | 16235400    | 9343400     | 51165400   | 28065400   | 65165400   | 90555400   |
| 16:0/17:1/18:1       | 4137000     | 16844000    | 13074000    | 100434000  | 36974000   | 93664000   | 209534000  |
| 16:1/18:2/18:3       | 6618000     | 7563000     | 8387000     | 8656000    | 7124000    | 11580000   | 12230000   |
| 16:1/18:2/18:2       | 60132600    | 76802600    | 84792600    | 96572600   | 84822600   | 154002600  | 144702600  |
| 16:0/18:3/18:3       | 239213200   | 265713200   | 280313200   | 289213200  | 293313200  | 336713200  | 351213200  |
| 16:0/18:1/18:1       | 651417000   | 889417000   | 1044717000  | 1131717000 | 1049717000 | 1967717000 | 1790717000 |
| 16:1/18:1/18:1       | 350998000   | 620098000   | 728198000   | 575298000  | 611898000  | 1101198000 | 1008198000 |
| 18:0/16:0/18:0       | -1351000    | 5946000     | -274000     | 766000     | 404000     | 293000     | 5596000    |
| 18:0/16:0/18:1       | 204881000   | 251781000   | 294481000   | 255881000  | 261981000  | 460181000  | 484981000  |
| 18:1/17:1/18:1       | 3689500     | 5196500     | 5905500     | 11836500   | 11186500   | 19696500   | 21746500   |
| 17:0/18:1/18:1       | 3882870     | 10355870    | 5462870     | 14605870   | 14895870   | 26285870   | 30315870   |
| 18:0/17:0/18:1       | 1815370     | 2666370     | 2927370     | 6245370    | 6207370    | 13873370   | 14393370   |
| 16:0/18:2/18:3       | 358861000   | 410861000   | 423761000   | 401361000  | 383261000  | 456261000  | 453961000  |
| 16:1/18:1/18:2       | 197861810   | 362561810   | 252361810   | 516761810  | 494661810  | 520561810  | 554361810  |
| 16:0/18:1/18:3       | 180684000   | 230684000   | 236784000   | 242384000  | 220484000  | 312984000  | 284684000  |
| 18:1/17:1/18:2       | 2040932     | 2523932     | 2585932     | 4208932    | 4480932    | 9307932    | 8063932    |
| 18:1/18:1/18:2       | 41067000    | 59897000    | 82277000    | 146257000  | 151157000  | 270257000  | 256057000  |
| 18:1/18:1/18:1       | 57566000    | 82996000    | 97366000    | 176266000  | 148266000  | 264166000  | 236166000  |
| 18:1/18:2/18:2       | 23786000    | 24666000    | 23886000    | 37276000   | 37106000   | 194856000  | 62736000   |
| 18:1/18:2/18:3       | 4033000     | 4218000     | 4060000     | 8135000    | 8378000    | 8587000    | 11959000   |
| 18:0/18:0/18:0       | 874000      | 415000      | 863000      | 16000      | 412000     | 1362000    | 726000     |
| 20:0/16:0/18:1       | 32296500    | 38566500    | 51966500    | 40066500   | 42846500   | 73046500   | 70666500   |
| 18:0/18:1/18:1       | 81152000    | 101912000   | 122712000   | 128612000  | 121612000  | 227012000  | 235612000  |
| 18:0/18:1/20:0       | 4287500     | 2946500     | 5775500     | 5189500    | 6357500    | 10104500   | 8550500    |
| 20:0/18:1/18:1       | 7320500     | 7999500     | 10952500    | 16302500   | 19632500   | 30372500   | 29632500   |
| 20:0/18:1/18:2       | 1844160     | 2363160     | 2575160     | 6299160    | 7283160    | 11603160   | 11413160   |
| 18:0/18:1/20:3       | 10737520    | 11887520    | 15497520    | 12437520   | 13607520   | 20487520   | 20097520   |
| 20:1/18:1/18:2       | 902700      | 1274200     | 2044200     | 4523200    | 6021200    | 8181200    | 7727200    |
| 18:0/18:1/20:4       | 25554100    | 30534100    | 34514100    | 38384100   | 40504100   | 57014100   | 59884100   |
| 18:0/18:1/20:5       | 6982000     | 10821000    | 8221000     | 18731000   | 19941000   | 31471000   | 28641000   |

|                |            |            |            |            |            |            |            |
|----------------|------------|------------|------------|------------|------------|------------|------------|
| 18:1/18:2/20:4 | 10681000   | 17171000   | 14131000   | 32331000   | 31021000   | 42521000   | 40971000   |
| 16:1/13:0/14:0 | 13329030   | 20259030   | 19019030   | 45249030   | 28799030   | 56029030   | 70829030   |
| 16:0/13:0/14:0 | 6196000    | 10599000   | 11059000   | 36299000   | 23969000   | 32019000   | 49869000   |
| 12:0/14:1/18:3 | 8790000    | 8677000    | 11500000   | 8853000    | 8726000    | 14370000   | 16240000   |
| 16:1/12:0/16:1 | 678033300  | 1046033300 | 1335033300 | 1390033300 | 955133300  | 2383033300 | 2367033300 |
| 16:1/14:1/14:1 | 149165090  | 289265090  | 378165090  | 218965090  | 132165090  | 373365090  | 368365090  |
| 16:0/14:0/14:0 | 150501000  | 206901000  | 227501000  | 317201000  | 269201000  | 517701000  | 517801000  |
| 16:1/14:0/14:0 | 865006000  | 1521306000 | 1564306000 | 1717306000 | 1310306000 | 2807306000 | 2376306000 |
| 16:0/9:0/20:5  | 9265960    | 11568960   | 13068960   | 23668960   | 15348960   | 22308960   | 17968960   |
| 16:1/13:0/16:1 | 40157500   | 59137500   | 68267500   | 62877500   | 63237500   | 92627500   | 88377500   |
| 16:1/12:1/17:1 | 15681520   | 11441520   | 19681520   | 19411520   | 16531520   | 24631520   | 20631520   |
| 16:0/13:0/16:1 | 16147540   | 27777540   | 25897540   | 65397540   | 39867540   | 116777540  | 105977540  |
| 15:0/14:0/16:0 | 2747700    | 5173700    | 5266700    | 10177700   | 11527700   | 16297700   | 19007700   |
| 16:1/12:0/18:3 | 30040190   | 39840190   | 68370190   | 51410190   | 52560190   | 81240190   | 81230190   |
| 16:1/14:1/16:1 | 567743500  | 854043500  | 1023643500 | 754243500  | 774043500  | 1347643500 | 1289643500 |
| 16:1/14:0/16:1 | 1200527000 | 2320527000 | 2475527000 | 2450527000 | 2309527000 | 3902527000 | 4107527000 |
| 16:0/14:0/16:1 | 1199890000 | 2039890000 | 2212890000 | 2472890000 | 2038890000 | 3763890000 | 3703890000 |
| 16:0/14:0/16:0 | 33530000   | 41780000   | 45330000   | 66210000   | 62020000   | 108340000  | 114840000  |
| 18:4/13:0/16:1 | 15020980   | 20390980   | 23860980   | 22120980   | 25580980   | 37290980   | 31310980   |
| 16:1/13:0/18:3 | 12905110   | 25995110   | 23495110   | 20325110   | 15845110   | 39395110   | 30755110   |
| 16:1/13:0/18:2 | 22309630   | 27299630   | 29549630   | 32819630   | 24079630   | 58839630   | 48109630   |
| 15:0/16:0/16:0 | -3774000   | -4006000   | -3577000   | 588000     | -2416000   | 4224000    | 1917000    |
| 15:0/16:0/16:1 | 21870000   | 41550000   | 31210000   | 79930000   | 76170000   | 134650000  | 156050000  |
| 15:0/16:1/16:1 | 12790500   | 19000500   | 21280500   | 58390500   | 37030500   | 72210500   | 87500500   |
| 18:4/14:0/16:0 | 181187000  | 205787000  | 210187000  | 210787000  | 195387000  | 229187000  | 222787000  |
| 16:1/14:1/18:2 | 77313700   | 104483700  | 107483700  | 80713700   | 84323700   | 139483700  | 128883700  |
| 16:1/14:1/18:3 | 18850000   | 24380000   | 19030000   | 24080000   | 18310000   | 28730000   | 18480000   |
| 16:0/16:0/16:0 | 10890000   | 11380000   | 16000000   | 19130000   | 17710000   | 24150000   | 37880000   |
| 16:0/14:0/18:1 | 1462227000 | 2093227000 | 2285227000 | 2493227000 | 2257227000 | 4009227000 | 4207227000 |
| 16:1/14:0/18:1 | 2413634000 | 3721634000 | 4113634000 | 3295634000 | 3620634000 | 6420634000 | 6523634000 |
| 16:1/16:1/16:1 | 1259614000 | 1910614000 | 1894614000 | 1870614000 | 1771614000 | 2733614000 | 2811614000 |
| 18:4/15:0/16:1 | 24866790   | 34216790   | 25226790   | 44996790   | 5740790    | 54936790   | 58736790   |
| 16:1/16:1/17:1 | 29614120   | 53894120   | 53674120   | 58864120   | 52714120   | 94444120   | 104034120  |



|                |            |            |            |            |            |            |            |
|----------------|------------|------------|------------|------------|------------|------------|------------|
| 16:0/16:0/18:1 | 940998000  | 1337998000 | 1505998000 | 1632998000 | 1397998000 | 2759998000 | 2529998000 |
| 16:1/16:1/17:0 | 19234000   | 26384000   | 25904000   | 82114000   | 53734000   | 105094000  | 122294000  |
| 15:0/16:0/18:1 | 20373000   | 32913000   | 27363000   | 103293000  | 67123000   | 146293000  | 157693000  |
| 16:1/16:1/18:3 | 48716010   | 65426010   | 75796010   | 61616010   | 58326010   | 106266010  | 104066010  |
| 18:0/16:0/16:0 | 2430000    | 3115000    | 3538000    | 2519000    | 4656000    | 7666000    | 9286000    |
| 16:1/16:1/18:1 | 1445819000 | 1048819000 | 1532819000 | 2460819000 | 1112819000 | 1927819000 | 1663819000 |
| 16:0/16:1/18:1 | 2259521000 | 3282521000 | 3769521000 | 3557521000 | 3427521000 | 5693521000 | 6088521000 |
| 16:1/16:1/18:2 | 222845400  | 333245400  | 407745400  | 398745400  | 357645400  | 657445400  | 678045400  |
| 4:0/14:0/16:1  | 4557000    | 3758000    | 7911000    | 6126000    | 6512000    | 9974000    | 10230000   |
| 12:0/12:0/12:1 | 3052000    | 4825000    | 6376000    | 6618000    | 7058000    | 11680000   | 11850000   |
| 4:0/16:1/16:1  | 4847000    | 3396000    | 8107000    | 5018000    | 5778000    | 7704000    | 7573000    |
| 12:0/14:1/14:1 | 82885700   | 97715700   | 173695700  | 64675700   | 97045700   | 135895700  | 101295700  |
| 16:1/12:0/12:0 | 384788700  | 673688700  | 812688700  | 517788700  | 545188700  | 878888700  | 964388700  |
| 12:0/13:0/14:0 | 7012600    | 9015600    | 7736600    | 25022600   | 19612600   | 33282600   | 28552600   |
| 14:1/12:1/14:1 | 5199510    | 12032510   | 18392510   | 5524510    | 10192510   | 18972510   | 7462510    |
| 11:0/14:1/14:1 | 2981000    | 7452000    | 4521000    | 6734000    | 8740000    | 11010000   | 5697000    |
| 12:0/13:0/14:1 | 13711210   | 21751210   | 24651210   | 44951210   | 49221210   | 29041210   | 31341210   |
| 12:0/12:0/14:0 | 295054000  | 487154000  | 597854000  | 534654000  | 443354000  | 959254000  | 877354000  |
| 12:0/12:0/14:1 | 109223650  | 168123650  | 211323650  | 122223650  | 150823650  | 209823650  | 185123650  |
| 6:0/14:1/18:0  | 5382300    | 4312300    | 8269300    | 5289300    | 5407300    | 9215300    | 8442300    |
| 12:0/12:0/13:0 | 6437660    | 12098660   | 12798660   | 9628660    | 10388660   | 14908660   | 15368660   |
| 12:0/12:1/14:1 | 6960950    | 9858950    | 16655950   | 8248950    | 11065950   | 15255950   | 16115950   |
| 12:0/12:0/12:0 | 37670000   | 82170000   | 98680000   | 75030000   | 80380000   | 138180000  | 136280000  |
| 16:1/13:0/14:1 | 42614890   | 53754890   | 58024890   | 55934890   | 48574890   | 69304890   | 70244890   |
| 16:1/11:4/16:1 | 5941000    | 7661000    | 13750000   | 12660000   | 15270000   | 22180000   | 21430000   |
| 14:0/14:0/14:0 | 385915000  | 601715000  | 632015000  | 841015000  | 711715000  | 1287615000 | 1369615000 |
| 14:0/14:0/14:1 | 675182000  | 1052482000 | 1138482000 | 1231482000 | 976882000  | 1697482000 | 1848482000 |
| 16:1/12:0/14:1 | 820078500  | 1081878500 | 1105878500 | 677178500  | 961878500  | 1578878500 | 1143878500 |
| 16:1/12:1/14:1 | 44080000   | 51430000   | 68610000   | 34050000   | 39450000   | 55830000   | 61110000   |
| 14:0/13:0/14:0 | 11909370   | 16269370   | 15669370   | 37449370   | 24689370   | 50449370   | 51789370   |
| 16:1/12:0/13:0 | 39732960   | 57002960   | 61132960   | 55512960   | 79152960   | 82472960   | 76482960   |
| 13:0/14:1/14:1 | 28310000   | 28410000   | 30680000   | 17060000   | 17810000   | 44780000   | 41760000   |
| 12:0/14:0/14:0 | 459324000  | 715924000  | 841324000  | 938724000  | 777924000  | 1409724000 | 1287724000 |

|                                |            |            |            |            |            |            |            |
|--------------------------------|------------|------------|------------|------------|------------|------------|------------|
| sum of all triglyceride values | 2.1588E+10 | 3.1807E+10 | 3.5577E+10 | 3.6082E+10 | 3.2121E+10 | 5.6826E+10 | 5.6153E+10 |
|--------------------------------|------------|------------|------------|------------|------------|------------|------------|
